# Supplementary material
Source: PubMed Central journal article supplement (PMC3567863)

## Supplemental Information

### **A Combined Proteomic and Transcriptomic Approach Shows Diverging Molecular Mechanisms in Thoracic Aortic Aneurysm Development In Patients With Tricuspid- And Bicuspid Aortic Valve**

Sanela Kjellqvist<sup>1\*</sup>‡, Shohreh Maleki<sup>1</sup>, Therese Olsson<sup>1</sup>, Maggy Chwastyniak<sup>2</sup>, Rui Miguel Mamede Branca<sup>3</sup>, Janne Lehtiö<sup>3</sup>, Florence Pinet<sup>2</sup>, Anders Franco-Cereceda<sup>4</sup>, and Per Eriksson<sup>1</sup>

<sup>1</sup>Atherosclerosis Research Unit, Center for Molecular Medicine, Department of Medicine, Karolinska Institutet, Stockholm, Sweden, <sup>2</sup>Inserm U744, Institut Pasteur de Lille, University of Lille Nord de France, Lille, France, <sup>3</sup>Clinical Proteomics Mass Spectrometry, Department of Oncology-Pathology, Science for Life Laboratory and Karolinska Institutet, Stockholm, Sweden, <sup>4</sup>Cardiothoracic Surgery Unit, Department of Molecular Medicine and Surgery, Karolinska Institutet, Stockholm, Sweden.

‡Formerly Sanela Kurtovic.

#### **\*Address for correspondence:**

CMM, L8:03, Karolinska University Hospital, Solna,

S-171 76 Stockholm, Sweden

Phone + 46 8-51773828

Fax. +46 8-311 298

E-mail: sanela.kjellqvist@ki.se

**Keywords:** Proteomics, 2D-DIGE, LC-MS/MS, PCA, OPLS-DA

### *Supplemental Figure 1*

PCA (A) and OPLS-DA (B) of protein spot expression data with TAV vs BAV contrast in OPLS-DA. The analyses were performed on 22 patients with TAV and BAV and non-dilated ascending aorta. The Hotelling's T<sup>2</sup> (based on 95% confidence level) tolerance ellipsoid and ellipse are shown in the scores plots of PCA (A) and OPLS-DA (B), respectively. Three-dimensional scores plot showing the PC1-PC3 plane of TAV (blue) and BAV (green) samples with non-dilated aorta tissues. Three-dimensional score plots are rotated as to display the highest separation between the two groups of patients. Two-dimensional scores plot of OPLS-DA showing the first predictive component (tp1) and orthogonal component (to1) plane of TAV (blue) and BAV (green) samples without dilatation. Bar plots of loadings and jack-knife confidence intervals contributing to the first PC for the 302 protein spots. Model parameters for both PCA and OPLS-DA are shown in Supplemental Table 1.

### *Supplemental Figure 2*

PCA (A, D) and OPLS-DA (B-C, E-F) of LC-MS/MS protein expression data. The analyses were performed on 21 patients and 35 proteins found in the LC-MS/MS analysis that overlap with proteins identified by 2D gel analysis (Table 2). The Hotelling's T<sup>2</sup> (based on 95% confidence level) tolerance ellipsoid and ellipse are shown in the scores plots of PCA (A, D) and OPLS-DA (B, E), respectively. Three-dimensional scores plot showing the PC1-PC3 plane of non-dilated (black) and dilated (red) thoracic aorta tissue samples with TAV (A) and BAV (D) patients separately. Three-dimensional score plots are rotated as to display the highest separation between the two groups of patients. Two-dimensional scores plot of OPLS-DA showing the first predictive component (tp1) and orthogonal component (to1) plane of non-dilated (black) and dilated (red) thoracic aorta tissue samples with TAV (B) and BAV (E) separately. Bar plots of loadings and jack-knife confidence intervals contributing to the first PC for the chosen genes in TAV (C) and BAV (F). Model parameters for both PCA and OPLS-DA are shown in Supplemental Table 1.

### *Supplemental Figure 3*

OPLS-DA of LC-MS/MS protein expression data. The analyses were performed on 21 patients and 286 proteins in A and 35 proteins found in the LC-MS/MS analysis that overlap with proteins identified by 2D gel analysis (Table 2) in B (corresponding PCA and loading plot for this particular analysis can be found in Supplemental Figure 2). Combined model scatter plot where loadings from TAV model of dilated versus non-dilated aorta samples is plotted against loadings from BAV model of dilated versus non-dilated aorta samples, color coded according to significant proteins identified with 2D-DIGE where common proteins for TAV and BAV models are color coded as red dots, statistically significant only in TAV (blue dots), and BAV (green dots). Model parameters for OPLS-DA are shown in Supplemental Table 1.

### *Supplemental Figure 4*

IHC staining of paraffin-embedded sections taken from aortic intima-media in non-dilated (ND) and dilated (D) aortas of TAV and BAV patients respectively. Pictures are aligned according to aortic phenotypes in perpendicular, and antibodies used in the vertical columns. Antibodies: anti-human, LDH, TGM2, TTR, VIM antibodies, top to bottom respectively.

### *Supplemental Figure 5*

PCA (A, D) and OPLS-DA (B-C, E-F) of mRNA expression data. The analyses were performed on 81 patients (4) and 43 genes chosen based on the identified protein spots in Figure 1, Table 1, Supplemental Table 3. The Hotelling's T<sup>2</sup> (based on 95% confidence level) tolerance ellipsoid and ellipse are shown in the scores plots of PCA (A, D) and OPLS-DA (B, E), respectively. Three-dimensional scores plot showing the PC1-PC3 plane of non-dilated (black) and dilated (red) thoracic aorta tissue samples with TAV (A) and BAV (D) patients separately. Three-dimensional score plots are rotated as to display the highest separation between the two groups of patients. Two-dimensional scores plot of OPLS-DA showing the first predictive component (tp1) and orthogonal component (to1) plane of

non-dilated (black) and dilated (red) thoracic aorta tissue samples with TAV (B) and BAV (E) separately. Bar plots of loadings and jack-knife confidence intervals contributing to the first PC for the chosen genes in TAV (C) and BAV (F). Model parameters for both PCA and OPLS-DA are shown in Supplemental Table 1.

#### *Supplemental Figure 6*

PCA (A, D) and OPLS-DA (B-C, E-F) of gene level normalized exon expression (splice index) data. The analyses were performed on 81 patients (4) and 393 exons chosen based on the identified protein spots in Figure 1, Table 1, Supplemental Table 3. The Hotelling's T<sup>2</sup> (based on 95% confidence level) tolerance ellipsoid and ellipse are shown in the scores plots of PCA (A, D) and OPLS-DA (B, E), respectively. Three-dimensional scores plot showing the PC1-PC3 plane of non-dilated (black) and dilated (red) thoracic aorta tissue samples with TAV (A) and BAV (D) patients separately. Three-dimensional score plots are rotated as to display the highest separation between the two groups of patients. Two-dimensional scores plot of OPLS-DA showing the first predictive component (tp1) and orthogonal component (to1) plane of non-dilated (black) and dilated (red) thoracic aorta tissue samples with TAV (B) and BAV (E) separately. Bar plots of loadings and jack-knife confidence intervals contributing to the first PC for the chosen genes in TAV (C) and BAV (F). (G) Combined model scatter plot where loadings from TAV model of dilated versus non-dilated aorta samples is plotted against loadings from BAV model of dilated versus non-dilated aorta samples, color coded according to significant spots (derived from (C) and (F)) common for TAV and BAV models (red dots), statistically significant only in TAV (blue dots), and BAV (green dots). The black diagonal is aimed for the interpretation purposes. (H) Venn diagram based on ABS (loading) – ABS (jack-knife confidence interval) significant protein spots of dilated versus non-dilated samples in TAV and BAV patients separately, color coded according to (G). Model parameters for both PCA and OPLS-DA are shown in Supplemental Table 1.

**Supplemental Table 1.** Model quality parameters of PCA and OPLS-DA. No of PCs refers to the optimal number of PCs for a particular multivariate data model according to cross-validation.  $R_X^2$  accounts for the explained variance while  $Q_Y^2$  accounts for the cumulative fraction of the total variation of Y that can be predicted by the model.  $Q_X^2$  accounts for the cumulative fraction of the total variation of X that can be predicted by the model.  $R_Y^2$  accounts for the explained variance for the Y component.

**PCA models**

| Model description                                                                             | No of PCs | No of patients | No of protein spots/proteins/genes/exons | $R_X^2$ | $Q_X^2$ |
|-----------------------------------------------------------------------------------------------|-----------|----------------|------------------------------------------|---------|---------|
| Protein level 2D gel - TAV patients only - <b>Figure 2</b>                                    | 3         | 21             | 302                                      | 0.632   | 0.363   |
| Protein level 2D gel - BAV patients only - <b>Figure 2</b>                                    | 3         | 23             | 302                                      | 0.526   | 0.254   |
| Protein level 2D gel - Non-dilated patients only - <b>Supplemental Figure 1</b>               | 3         | 22             | 302                                      | 0.542   | 0.0746  |
| Protein level LC-MS/MS - TAV patients only - <b>Supplemental Figure 2</b>                     | 3         | 10             | 35                                       | 0.721   | 0.129   |
| Protein level LC-MS/MS - BAV patients only - <b>Supplemental Figure 2</b>                     | 3         | 11             | 35                                       | 0.706   | 0.142   |
| Gene level - TAV patients only, genes from identified proteins - <b>Supplemental Figure 5</b> | 4         | 29             | 43                                       | 0.64    | 0.22    |
| Gene level - BAV patients only, genes from identified proteins - <b>Supplemental Figure 5</b> | 4         | 52             | 43                                       | 0.55    | 0.25    |
| Exon level - TAV patients only, exons from identified proteins - <b>Supplemental Figure 6</b> | 4         | 29             | 393                                      | 0.45    | 0.15    |
| Exon level - BAV patients only, exons from identified proteins - <b>Supplemental Figure 6</b> | 4         | 52             | 393                                      | 0.37    | 0.16    |

**OPLS-DA models**

| Model description                                                                                             | No of PCs | No of patients | No of protein spots/proteins/genes/exons | $R_Y^2$ | $Q_Y^2$ | $R_X^2$ |
|---------------------------------------------------------------------------------------------------------------|-----------|----------------|------------------------------------------|---------|---------|---------|
| Protein level - TAV patients only - <b>Figure 2, Figure 3</b>                                                 | 1+4       | 21             | 302                                      | 0.992   | 0.783   | 0.699   |
| Protein level - BAV patients only - <b>Figure 2, Figure 3</b>                                                 | 1+4       | 23             | 302                                      | 0.988   | 0.464   | 0.581   |
| Protein level - Non-dilated patients only, TAV vs BAV - <b>Supplemental Figure 1</b>                          | 1+1       | 22             | 302                                      | 0.736   | -0.419  | 0.263   |
| Protein level LC-MS/MS only 2D gel identified proteins - TAV patients only - <b>Supplemental Figure 2, 3B</b> | 1+1       | 10             | 35                                       | 0.937   | 0.725   | 0.602   |
| Protein level LC-MS/MS only 2D gel identified proteins - BAV patients only - <b>Supplemental Figure 2, 3B</b> | 1+1       | 11             | 35                                       | 0.924   | 0.435   | 0.527   |
| Protein level LC-MS/MS all identified proteins - TAV patients only - <b>Supplemental Figure 3A</b>            | 1+1       | 10             | 286                                      | 0.976   | 0.773   | 0.448   |
| Protein level LC-MS/MS all identified proteins - BAV patients only - <b>Supplemental Figure 3A</b>            | 1+1       | 11             | 286                                      | 0.954   | 0.416   | 0.423   |
| Gene level - TAV patients only, genes from identified proteins - <b>Supplemental Figure 5</b>                 | 1+1       | 29             | 43                                       | 0.784   | 0.537   | 0.41    |
| Gene level - BAV patients only, genes from identified proteins - <b>Supplemental Figure 5</b>                 | 1+1       | 52             | 43                                       | 0.6     | 0.3     | 0.35    |
| Exon level - TAV patients only, exons from identified proteins - <b>Supplemental Figure 6</b>                 | 1+1       | 29             | 393                                      | 0.91    | 0.48    | 0.18    |
| Exon level - BAV patients only, exons from identified proteins - <b>Supplemental Figure 6</b>                 | 1+2       | 52             | 393                                      | 0.89    | 0.34    | 0.25    |

**Supplemental Table 2.** Loadings and jack-knife (JK) confidence intervals for the 302 protein spots data set for both TAV and BAV OPLS-DA models, where dilated and non-dilated have been added as a Y variable.

| TAV model           |                            |                                                  |                                         |                                        | BAV model           |                            |                                                  |                                         |                                        |
|---------------------|----------------------------|--------------------------------------------------|-----------------------------------------|----------------------------------------|---------------------|----------------------------|--------------------------------------------------|-----------------------------------------|----------------------------------------|
| Protein spot number | Loading value <sup>a</sup> | jack-knife (JK) confidence interval <sup>b</sup> | ABS>Loading value)-ABS(JK) <sup>c</sup> | Significant probe set = 1 <sup>d</sup> | Protein spot number | Loading value <sup>a</sup> | jack-knife (JK) confidence interval <sup>b</sup> | ABS>Loading value)-ABS(JK) <sup>c</sup> | Significant probe set = 1 <sup>d</sup> |
| 47                  | 0.076                      | 0.037                                            | 0.039                                   | 1                                      | 47                  | 0.053                      | 0.032                                            | 0.021                                   | 1                                      |
| 50                  | 0.095                      | 0.044                                            | 0.051                                   | 1                                      | 50                  | 0.103                      | 0.039                                            | 0.064                                   | 1                                      |
| 51                  | 0.085                      | 0.050                                            | 0.035                                   | 1                                      | 51                  | 0.075                      | 0.042                                            | 0.033                                   | 1                                      |
| 52                  | 0.074                      | 0.050                                            | 0.024                                   | 1                                      | 52                  | 0.071                      | 0.032                                            | 0.039                                   | 1                                      |
| 53                  | 0.064                      | 0.033                                            | 0.031                                   | 1                                      | 53                  | 0.053                      | 0.043                                            | 0.010                                   | 1                                      |
| 54                  | 0.038                      | 0.033                                            | 0.005                                   | 1                                      | 57                  | 0.106                      | 0.045                                            | 0.061                                   | 1                                      |
| 57                  | 0.107                      | 0.028                                            | 0.078                                   | 1                                      | 58                  | 0.118                      | 0.033                                            | 0.086                                   | 1                                      |
| 58                  | 0.080                      | 0.017                                            | 0.063                                   | 1                                      | 59                  | 0.115                      | 0.028                                            | 0.087                                   | 1                                      |
| 59                  | 0.082                      | 0.028                                            | 0.053                                   | 1                                      | 62                  | 0.117                      | 0.045                                            | 0.072                                   | 1                                      |
| 62                  | 0.079                      | 0.017                                            | 0.062                                   | 1                                      | 63                  | 0.096                      | 0.067                                            | 0.029                                   | 1                                      |
| 63                  | 0.082                      | 0.030                                            | 0.051                                   | 1                                      | 64                  | 0.101                      | 0.065                                            | 0.036                                   | 1                                      |
| 64                  | 0.078                      | 0.028                                            | 0.051                                   | 1                                      | 65                  | 0.109                      | 0.060                                            | 0.049                                   | 1                                      |
| 65                  | 0.076                      | 0.028                                            | 0.047                                   | 1                                      | 67                  | 0.069                      | 0.035                                            | 0.034                                   | 1                                      |
| 66                  | 0.083                      | 0.043                                            | 0.039                                   | 1                                      | 76                  | 0.085                      | 0.022                                            | 0.063                                   | 1                                      |
| 67                  | 0.087                      | 0.042                                            | 0.046                                   | 1                                      | 82                  | 0.047                      | 0.039                                            | 0.009                                   | 1                                      |
| 76                  | 0.105                      | 0.021                                            | 0.083                                   | 1                                      | 90                  | 0.076                      | 0.063                                            | 0.013                                   | 1                                      |
| 80                  | 0.033                      | 0.029                                            | 0.004                                   | 1                                      | 97                  | 0.068                      | 0.062                                            | 0.006                                   | 1                                      |
| 91                  | -0.042                     | 0.022                                            | 0.019                                   | 1                                      | 112                 | 0.065                      | 0.054                                            | 0.011                                   | 1                                      |
| 94                  | -0.069                     | 0.029                                            | 0.040                                   | 1                                      | 114                 | 0.076                      | 0.030                                            | 0.046                                   | 1                                      |
| 100                 | -0.057                     | 0.038                                            | 0.020                                   | 1                                      | 122                 | 0.060                      | 0.039                                            | 0.021                                   | 1                                      |
| 101                 | -0.058                     | 0.028                                            | 0.030                                   | 1                                      | 128                 | 0.061                      | 0.037                                            | 0.024                                   | 1                                      |
| 102                 | -0.065                     | 0.029                                            | 0.035                                   | 1                                      | 130                 | 0.048                      | 0.036                                            | 0.012                                   | 1                                      |
| 106                 | -0.052                     | 0.032                                            | 0.020                                   | 1                                      | 131                 | 0.082                      | 0.082                                            | 0.000                                   | 1                                      |
| 112                 | 0.089                      | 0.046                                            | 0.043                                   | 1                                      | 133                 | 0.058                      | 0.040                                            | 0.017                                   | 1                                      |
| 113                 | 0.091                      | 0.042                                            | 0.049                                   | 1                                      | 136                 | 0.070                      | 0.030                                            | 0.040                                   | 1                                      |
| 114                 | 0.106                      | 0.039                                            | 0.068                                   | 1                                      | 142                 | 0.094                      | 0.038                                            | 0.056                                   | 1                                      |
| 115                 | -0.051                     | 0.022                                            | 0.029                                   | 1                                      | 149                 | 0.073                      | 0.042                                            | 0.031                                   | 1                                      |
| 116                 | -0.053                     | 0.029                                            | 0.024                                   | 1                                      | 152                 | 0.086                      | 0.041                                            | 0.045                                   | 1                                      |
| 117                 | -0.045                     | 0.033                                            | 0.012                                   | 1                                      | 153                 | 0.068                      | 0.052                                            | 0.017                                   | 1                                      |
| 119                 | -0.056                     | 0.030                                            | 0.027                                   | 1                                      | 176                 | -0.067                     | 0.067                                            | 0.000                                   | 1                                      |
| 120                 | -0.053                     | 0.025                                            | 0.028                                   | 1                                      | 180                 | 0.093                      | 0.023                                            | 0.070                                   | 1                                      |
| 121                 | -0.055                     | 0.034                                            | 0.021                                   | 1                                      | 182                 | 0.083                      | 0.032                                            | 0.050                                   | 1                                      |
| 123                 | -0.043                     | 0.038                                            | 0.005                                   | 1                                      | 185                 | 0.071                      | 0.045                                            | 0.026                                   | 1                                      |
| 128                 | 0.096                      | 0.036                                            | 0.059                                   | 1                                      | 187                 | 0.058                      | 0.054                                            | 0.003                                   | 1                                      |
| 133                 | 0.073                      | 0.051                                            | 0.022                                   | 1                                      | 188                 | 0.067                      | 0.065                                            | 0.002                                   | 1                                      |
| 135                 | 0.079                      | 0.049                                            | 0.031                                   | 1                                      | 189                 | 0.091                      | 0.065                                            | 0.026                                   | 1                                      |
| 136                 | 0.102                      | 0.030                                            | 0.072                                   | 1                                      | 199                 | 0.051                      | 0.039                                            | 0.012                                   | 1                                      |
| 138                 | 0.071                      | 0.064                                            | 0.007                                   | 1                                      | 203                 | 0.086                      | 0.032                                            | 0.054                                   | 1                                      |
| 140                 | 0.093                      | 0.063                                            | 0.030                                   | 1                                      | 207                 | 0.089                      | 0.035                                            | 0.055                                   | 1                                      |
| 141                 | 0.088                      | 0.023                                            | 0.065                                   | 1                                      | 211                 | 0.081                      | 0.030                                            | 0.051                                   | 1                                      |
| 142                 | 0.076                      | 0.044                                            | 0.033                                   | 1                                      | 226                 | 0.105                      | 0.031                                            | 0.074                                   | 1                                      |
| 144                 | 0.074                      | 0.035                                            | 0.039                                   | 1                                      | 231                 | 0.065                      | 0.028                                            | 0.037                                   | 1                                      |
| 146                 | 0.072                      | 0.070                                            | 0.003                                   | 1                                      | 233                 | 0.061                      | 0.036                                            | 0.025                                   | 1                                      |
| 148                 | 0.089                      | 0.057                                            | 0.032                                   | 1                                      | 235                 | 0.050                      | 0.034                                            | 0.016                                   | 1                                      |
| 152                 | 0.053                      | 0.040                                            | 0.013                                   | 1                                      | 236                 | 0.055                      | 0.053                                            | 0.002                                   | 1                                      |
| 153                 | 0.068                      | 0.031                                            | 0.037                                   | 1                                      | 239                 | 0.052                      | 0.036                                            | 0.016                                   | 1                                      |
| 167                 | 0.115                      | 0.037                                            | 0.078                                   | 1                                      | 243                 | 0.102                      | 0.020                                            | 0.082                                   | 1                                      |
| 168                 | 0.075                      | 0.073                                            | 0.002                                   | 1                                      | 248                 | 0.087                      | 0.044                                            | 0.042                                   | 1                                      |
| 169                 | 0.088                      | 0.065                                            | 0.023                                   | 1                                      | 249                 | 0.075                      | 0.039                                            | 0.036                                   | 1                                      |
| 170                 | 0.049                      | 0.040                                            | 0.009                                   | 1                                      | 252                 | 0.070                      | 0.050                                            | 0.020                                   | 1                                      |
| 173                 | -0.038                     | 0.036                                            | 0.002                                   | 1                                      | 262                 | 0.064                      | 0.049                                            | 0.015                                   | 1                                      |
| 175                 | 0.049                      | 0.035                                            | 0.014                                   | 1                                      | 265                 | 0.071                      | 0.045                                            | 0.026                                   | 1                                      |
| 179                 | -0.056                     | 0.038                                            | 0.018                                   | 1                                      | 267                 | -0.083                     | 0.056                                            | 0.027                                   | 1                                      |
| 180                 | 0.046                      | 0.040                                            | 0.006                                   | 1                                      | 269                 | -0.076                     | 0.044                                            | 0.032                                   | 1                                      |
| 182                 | 0.056                      | 0.032                                            | 0.025                                   | 1                                      | 272                 | -0.059                     | 0.051                                            | 0.008                                   | 1                                      |
| 185                 | 0.061                      | 0.033                                            | 0.028                                   | 1                                      | 284                 | -0.079                     | 0.058                                            | 0.021                                   | 1                                      |
| 189                 | 0.045                      | 0.043                                            | 0.002                                   | 1                                      | 285                 | 0.060                      | 0.039                                            | 0.021                                   | 1                                      |
| 193                 | 0.044                      | 0.043                                            | 0.001                                   | 1                                      | 291                 | 0.069                      | 0.041                                            | 0.029                                   | 1                                      |
| 199                 | 0.089                      | 0.059                                            | 0.029                                   | 1                                      | 292                 | 0.075                      | 0.063                                            | 0.012                                   | 1                                      |
| 203                 | 0.101                      | 0.045                                            | 0.056                                   | 1                                      | 293                 | -0.086                     | 0.047                                            | 0.038                                   | 1                                      |
| 207                 | 0.091                      | 0.047                                            | 0.044                                   | 1                                      | 296                 | 0.043                      | 0.024                                            | 0.018                                   | 1                                      |
| 211                 | 0.053                      | 0.033                                            | 0.020                                   | 1                                      | 305                 | 0.059                      | 0.053                                            | 0.006                                   | 1                                      |
| 222                 | 0.086                      | 0.037                                            | 0.049                                   | 1                                      | 316                 | 0.079                      | 0.035                                            | 0.044                                   | 1                                      |
| 223                 | 0.077                      | 0.025                                            | 0.052                                   | 1                                      | 317                 | 0.072                      | 0.055                                            | 0.017                                   | 1                                      |
| 231                 | 0.053                      | 0.027                                            | 0.027                                   | 1                                      | 318                 | 0.095                      | 0.061                                            | 0.034                                   | 1                                      |
| 233                 | 0.045                      | 0.024                                            | 0.021                                   | 1                                      | 328                 | 0.077                      | 0.036                                            | 0.040                                   | 1                                      |
| 235                 | 0.030                      | 0.030                                            | 0.001                                   | 1                                      | 330                 | 0.084                      | 0.039                                            | 0.045                                   | 1                                      |
| 239                 | 0.040                      | 0.016                                            | 0.024                                   | 1                                      | 331                 | 0.070                      | 0.035                                            | 0.035                                   | 1                                      |
| 241                 | -0.051                     | 0.031                                            | 0.021                                   | 1                                      | 339                 | 0.066                      | 0.042                                            | 0.024                                   | 1                                      |
| 243                 | 0.049                      | 0.029                                            | 0.020                                   | 1                                      | 345                 | 0.068                      | 0.039                                            | 0.030                                   | 1                                      |
| 245                 | -0.050                     | 0.035                                            | 0.015                                   | 1                                      | 346                 | 0.064                      | 0.027                                            | 0.037                                   | 1                                      |
| 252                 | 0.059                      | 0.054                                            | 0.005                                   | 1                                      | 347                 | -0.071                     | 0.061                                            | 0.010                                   | 1                                      |
| 253                 | -0.049                     | 0.039                                            | 0.010                                   | 1                                      | 350                 | 0.074                      | 0.041                                            | 0.033                                   | 1                                      |
| 260                 | -0.069                     | 0.039                                            | 0.030                                   | 1                                      | 355                 | 0.071                      | 0.037                                            | 0.034                                   | 1                                      |
| 262                 | 0.064                      | 0.039                                            | 0.025                                   | 1                                      | 356                 | 0.084                      | 0.038                                            | 0.046                                   | 1                                      |
| 265                 | 0.084                      | 0.049                                            | 0.035                                   | 1                                      | 358                 | 0.064                      | 0.052                                            | 0.011                                   | 1                                      |
| 266                 | 0.083                      | 0.061                                            | 0.022                                   | 1                                      | 371                 | 0.072                      | 0.045                                            | 0.026                                   | 1                                      |
| 267                 | -0.073                     | 0.027                                            | 0.046                                   | 1                                      | 375                 | 0.059                      | 0.058                                            | 0.001                                   | 1                                      |
| 268                 | 0.083                      | 0.053                                            | 0.030                                   | 1                                      | 378                 | 0.061                      | 0.060                                            | 0.001                                   | 1                                      |
| 269                 | -0.067                     | 0.026                                            | 0.041                                   | 1                                      | 383                 | 0.058                      | 0.047                                            | 0.012                                   | 1                                      |
| 272                 | -0.052                     | 0.019                                            | 0.032                                   | 1                                      | 387                 | 0.088                      | 0.018                                            | 0.070                                   | 1                                      |
| 276                 | 0.072                      | 0.062                                            | 0.009                                   | 1                                      | 392                 | 0.091                      | 0.039                                            | 0.051                                   | 1                                      |
| 280                 | 0.076                      | 0.037                                            | 0.039                                   | 1                                      | 393                 | 0.096                      | 0.040                                            | 0.056                                   | 1                                      |
| 282                 | 0.088                      | 0.038                                            | 0.050                                   | 1                                      | 401                 | 0.056                      | 0.034                                            | 0.022                                   | 1                                      |
| 283                 | 0.044                      | 0.036                                            | 0.009                                   | 1                                      | 412                 | 0.066                      | 0.017                                            | 0.049                                   | 1                                      |

|     |        |       |        |   |     |        |       |        |   |
|-----|--------|-------|--------|---|-----|--------|-------|--------|---|
| 285 | 0.061  | 0.056 | 0.005  | 1 | 422 | 0.066  | 0.035 | 0.031  | 1 |
| 287 | 0.094  | 0.028 | 0.065  | 1 | 440 | 0.045  | 0.042 | 0.003  | 1 |
| 293 | -0.053 | 0.037 | 0.016  | 1 | 451 | -0.062 | 0.057 | 0.005  | 1 |
| 296 | 0.057  | 0.040 | 0.016  | 1 | 462 | -0.071 | 0.035 | 0.036  | 1 |
| 300 | 0.066  | 0.063 | 0.003  | 1 | 464 | -0.074 | 0.027 | 0.047  | 1 |
| 301 | 0.075  | 0.073 | 0.002  | 1 | 465 | -0.079 | 0.033 | 0.046  | 1 |
| 302 | 0.072  | 0.069 | 0.003  | 1 | 468 | -0.079 | 0.036 | 0.043  | 1 |
| 304 | 0.098  | 0.049 | 0.049  | 1 | 480 | -0.074 | 0.030 | 0.044  | 1 |
| 305 | 0.092  | 0.053 | 0.039  | 1 | 484 | -0.086 | 0.026 | 0.060  | 1 |
| 311 | 0.071  | 0.068 | 0.003  | 1 | 488 | -0.075 | 0.030 | 0.045  | 1 |
| 317 | 0.030  | 0.027 | 0.003  | 1 | 492 | -0.091 | 0.029 | 0.062  | 1 |
| 318 | 0.071  | 0.041 | 0.030  | 1 | 544 | 0.070  | 0.035 | 0.035  | 1 |
| 323 | -0.051 | 0.047 | 0.004  | 1 | 592 | -0.072 | 0.071 | 0.002  | 1 |
| 330 | 0.064  | 0.043 | 0.021  | 1 | 747 | -0.082 | 0.038 | 0.044  | 1 |
| 333 | 0.086  | 0.065 | 0.021  | 1 | 751 | -0.090 | 0.034 | 0.057  | 1 |
| 346 | 0.067  | 0.037 | 0.030  | 1 | 753 | 0.080  | 0.032 | 0.047  | 1 |
| 347 | -0.048 | 0.041 | 0.006  | 1 | 754 | 0.107  | 0.023 | 0.084  | 1 |
| 348 | 0.063  | 0.042 | 0.021  | 1 | 755 | 0.107  | 0.024 | 0.083  | 1 |
| 349 | -0.053 | 0.017 | 0.036  | 1 | 761 | 0.083  | 0.036 | 0.047  | 1 |
| 350 | 0.045  | 0.024 | 0.021  | 1 | 762 | 0.106  | 0.030 | 0.076  | 1 |
| 358 | 0.078  | 0.030 | 0.049  | 1 | 764 | 0.087  | 0.031 | 0.056  | 1 |
| 360 | 0.093  | 0.051 | 0.042  | 1 | 765 | 0.089  | 0.026 | 0.063  | 1 |
| 374 | 0.072  | 0.036 | 0.037  | 1 | 769 | 0.086  | 0.028 | 0.058  | 1 |
| 378 | 0.076  | 0.046 | 0.030  | 1 | 771 | 0.104  | 0.015 | 0.088  | 1 |
| 386 | 0.067  | 0.065 | 0.002  | 1 | 776 | 0.087  | 0.036 | 0.051  | 1 |
| 387 | 0.097  | 0.044 | 0.053  | 1 | 778 | 0.104  | 0.023 | 0.081  | 1 |
| 388 | 0.086  | 0.059 | 0.027  | 1 | 781 | 0.064  | 0.043 | 0.021  | 1 |
| 389 | 0.081  | 0.051 | 0.030  | 1 | 783 | 0.110  | 0.016 | 0.095  | 1 |
| 392 | 0.112  | 0.025 | 0.086  | 1 | 785 | 0.117  | 0.032 | 0.085  | 1 |
| 393 | 0.094  | 0.047 | 0.047  | 1 | 787 | 0.069  | 0.037 | 0.032  | 1 |
| 394 | 0.074  | 0.052 | 0.022  | 1 | 791 | 0.047  | 0.045 | 0.001  | 1 |
| 401 | 0.070  | 0.049 | 0.020  | 1 | 793 | 0.107  | 0.018 | 0.089  | 1 |
| 412 | 0.072  | 0.051 | 0.021  | 1 | 796 | 0.088  | 0.054 | 0.033  | 1 |
| 421 | 0.051  | 0.049 | 0.002  | 1 | 799 | 0.095  | 0.040 | 0.055  | 1 |
| 422 | 0.078  | 0.052 | 0.026  | 1 | 803 | 0.093  | 0.049 | 0.043  | 1 |
| 423 | 0.069  | 0.043 | 0.026  | 1 | 805 | 0.068  | 0.052 | 0.016  | 1 |
| 429 | 0.032  | 0.023 | 0.009  | 1 | 807 | 0.077  | 0.051 | 0.025  | 1 |
| 434 | -0.045 | 0.032 | 0.012  | 1 | 808 | 0.078  | 0.045 | 0.033  | 1 |
| 462 | -0.076 | 0.024 | 0.052  | 1 | 816 | 0.073  | 0.042 | 0.030  | 1 |
| 464 | -0.076 | 0.031 | 0.045  | 1 | 819 | 0.051  | 0.037 | 0.014  | 1 |
| 465 | -0.076 | 0.027 | 0.049  | 1 | 821 | 0.058  | 0.020 | 0.038  | 1 |
| 468 | -0.080 | 0.023 | 0.057  | 1 | 825 | 0.064  | 0.025 | 0.039  | 1 |
| 479 | -0.030 | 0.029 | 0.000  | 1 | 826 | 0.068  | 0.053 | 0.015  | 1 |
| 480 | -0.073 | 0.030 | 0.042  | 1 | 827 | 0.060  | 0.019 | 0.041  | 1 |
| 484 | -0.072 | 0.026 | 0.046  | 1 | 835 | -0.043 | 0.031 | 0.012  | 1 |
| 488 | -0.074 | 0.030 | 0.044  | 1 | 54  | 0.035  | 0.045 | -0.009 | 0 |
| 492 | -0.077 | 0.024 | 0.053  | 1 | 66  | 0.035  | 0.044 | -0.009 | 0 |
| 544 | 0.089  | 0.050 | 0.039  | 1 | 69  | 0.061  | 0.082 | -0.021 | 0 |
| 548 | 0.103  | 0.024 | 0.080  | 1 | 70  | 0.034  | 0.069 | -0.036 | 0 |
| 747 | -0.081 | 0.025 | 0.056  | 1 | 71  | 0.014  | 0.048 | -0.035 | 0 |
| 751 | -0.078 | 0.024 | 0.054  | 1 | 72  | 0.012  | 0.071 | -0.059 | 0 |
| 753 | 0.098  | 0.038 | 0.059  | 1 | 73  | 0.029  | 0.083 | -0.054 | 0 |
| 754 | 0.084  | 0.029 | 0.055  | 1 | 74  | 0.045  | 0.092 | -0.047 | 0 |
| 755 | 0.085  | 0.031 | 0.053  | 1 | 75  | 0.027  | 0.058 | -0.031 | 0 |
| 761 | 0.101  | 0.029 | 0.072  | 1 | 80  | 0.036  | 0.064 | -0.027 | 0 |
| 762 | 0.071  | 0.022 | 0.049  | 1 | 85  | 0.053  | 0.065 | -0.012 | 0 |
| 764 | 0.095  | 0.042 | 0.053  | 1 | 87  | 0.044  | 0.058 | -0.014 | 0 |
| 765 | 0.093  | 0.047 | 0.046  | 1 | 91  | 0.005  | 0.037 | -0.033 | 0 |
| 769 | 0.095  | 0.045 | 0.049  | 1 | 94  | -0.036 | 0.055 | -0.019 | 0 |
| 771 | 0.062  | 0.031 | 0.031  | 1 | 95  | -0.003 | 0.062 | -0.059 | 0 |
| 776 | 0.092  | 0.038 | 0.054  | 1 | 96  | 0.039  | 0.062 | -0.023 | 0 |
| 778 | 0.082  | 0.032 | 0.050  | 1 | 98  | 0.021  | 0.069 | -0.048 | 0 |
| 781 | 0.109  | 0.041 | 0.069  | 1 | 99  | -0.009 | 0.063 | -0.054 | 0 |
| 783 | 0.068  | 0.026 | 0.042  | 1 | 100 | -0.015 | 0.062 | -0.047 | 0 |
| 785 | 0.070  | 0.026 | 0.044  | 1 | 101 | -0.028 | 0.061 | -0.033 | 0 |
| 787 | 0.078  | 0.065 | 0.014  | 1 | 102 | -0.031 | 0.056 | -0.024 | 0 |
| 791 | 0.106  | 0.030 | 0.076  | 1 | 103 | -0.014 | 0.057 | -0.043 | 0 |
| 792 | 0.060  | 0.036 | 0.024  | 1 | 104 | 0.022  | 0.061 | -0.040 | 0 |
| 793 | 0.052  | 0.031 | 0.021  | 1 | 105 | 0.057  | 0.066 | -0.009 | 0 |
| 796 | 0.060  | 0.050 | 0.009  | 1 | 106 | -0.032 | 0.057 | -0.025 | 0 |
| 799 | 0.088  | 0.043 | 0.045  | 1 | 107 | -0.031 | 0.056 | -0.025 | 0 |
| 803 | 0.060  | 0.053 | 0.007  | 1 | 108 | -0.011 | 0.074 | -0.063 | 0 |
| 812 | 0.040  | 0.038 | 0.002  | 1 | 109 | 0.040  | 0.067 | -0.027 | 0 |
| 825 | -0.022 | 0.016 | 0.006  | 1 | 113 | 0.042  | 0.047 | -0.005 | 0 |
| 827 | -0.019 | 0.014 | 0.005  | 1 | 115 | -0.031 | 0.071 | -0.040 | 0 |
| 835 | -0.039 | 0.034 | 0.005  | 1 | 116 | -0.020 | 0.085 | -0.065 | 0 |
| 69  | 0.009  | 0.055 | -0.045 | 0 | 117 | -0.012 | 0.049 | -0.036 | 0 |
| 70  | 0.017  | 0.051 | -0.034 | 0 | 118 | 0.053  | 0.067 | -0.014 | 0 |
| 71  | 0.022  | 0.064 | -0.041 | 0 | 119 | -0.006 | 0.089 | -0.083 | 0 |
| 72  | -0.001 | 0.062 | -0.062 | 0 | 120 | 0.004  | 0.089 | -0.086 | 0 |
| 73  | -0.005 | 0.047 | -0.042 | 0 | 121 | 0.009  | 0.082 | -0.073 | 0 |
| 74  | 0.036  | 0.071 | -0.034 | 0 | 123 | 0.010  | 0.073 | -0.063 | 0 |
| 75  | 0.042  | 0.065 | -0.023 | 0 | 124 | 0.011  | 0.071 | -0.061 | 0 |
| 82  | 0.045  | 0.054 | -0.009 | 0 | 125 | 0.017  | 0.056 | -0.038 | 0 |
| 85  | 0.001  | 0.045 | -0.044 | 0 | 134 | -0.018 | 0.070 | -0.052 | 0 |
| 87  | -0.020 | 0.054 | -0.034 | 0 | 135 | 0.011  | 0.085 | -0.074 | 0 |
| 90  | -0.025 | 0.057 | -0.032 | 0 | 137 | -0.013 | 0.067 | -0.054 | 0 |
| 95  | -0.020 | 0.051 | -0.030 | 0 | 138 | -0.056 | 0.121 | -0.065 | 0 |
| 96  | 0.073  | 0.073 | -0.001 | 0 | 139 | -0.001 | 0.060 | -0.059 | 0 |
| 97  | 0.068  | 0.072 | -0.004 | 0 | 140 | 0.026  | 0.072 | -0.045 | 0 |
| 98  | 0.010  | 0.065 | -0.055 | 0 | 141 | 0.041  | 0.087 | -0.046 | 0 |
| 99  | -0.030 | 0.059 | -0.029 | 0 | 144 | 0.058  | 0.065 | -0.007 | 0 |

|     |        |       |        |   |     |        |       |        |   |
|-----|--------|-------|--------|---|-----|--------|-------|--------|---|
| 103 | -0.031 | 0.046 | -0.015 | 0 | 146 | -0.031 | 0.058 | -0.027 | 0 |
| 104 | 0.011  | 0.054 | -0.043 | 0 | 148 | 0.016  | 0.039 | -0.023 | 0 |
| 105 | 0.040  | 0.063 | -0.023 | 0 | 155 | 0.008  | 0.059 | -0.051 | 0 |
| 107 | -0.042 | 0.042 | 0.000  | 0 | 156 | 0.005  | 0.064 | -0.059 | 0 |
| 108 | -0.017 | 0.025 | -0.008 | 0 | 157 | 0.002  | 0.069 | -0.067 | 0 |
| 109 | 0.014  | 0.057 | -0.043 | 0 | 158 | 0.019  | 0.062 | -0.043 | 0 |
| 118 | 0.021  | 0.049 | -0.028 | 0 | 159 | 0.020  | 0.065 | -0.044 | 0 |
| 122 | 0.006  | 0.055 | -0.049 | 0 | 161 | 0.021  | 0.054 | -0.033 | 0 |
| 124 | -0.030 | 0.040 | -0.010 | 0 | 162 | 0.035  | 0.058 | -0.024 | 0 |
| 125 | 0.002  | 0.042 | -0.040 | 0 | 163 | 0.020  | 0.057 | -0.037 | 0 |
| 130 | 0.020  | 0.055 | -0.035 | 0 | 164 | 0.028  | 0.091 | -0.063 | 0 |
| 131 | -0.011 | 0.051 | -0.041 | 0 | 165 | 0.045  | 0.097 | -0.052 | 0 |
| 134 | -0.036 | 0.057 | -0.021 | 0 | 166 | 0.017  | 0.101 | -0.084 | 0 |
| 137 | 0.062  | 0.074 | -0.012 | 0 | 167 | 0.057  | 0.058 | -0.001 | 0 |
| 139 | 0.045  | 0.061 | -0.016 | 0 | 168 | -0.012 | 0.068 | -0.056 | 0 |
| 149 | 0.003  | 0.047 | -0.044 | 0 | 169 | 0.005  | 0.071 | -0.066 | 0 |
| 155 | 0.043  | 0.064 | -0.021 | 0 | 170 | -0.028 | 0.100 | -0.072 | 0 |
| 156 | 0.046  | 0.066 | -0.020 | 0 | 171 | -0.039 | 0.080 | -0.041 | 0 |
| 157 | 0.042  | 0.063 | -0.020 | 0 | 172 | 0.003  | 0.062 | -0.059 | 0 |
| 158 | 0.049  | 0.058 | -0.009 | 0 | 173 | -0.053 | 0.082 | -0.030 | 0 |
| 159 | 0.045  | 0.064 | -0.019 | 0 | 174 | 0.019  | 0.092 | -0.073 | 0 |
| 161 | 0.012  | 0.055 | -0.043 | 0 | 175 | -0.024 | 0.090 | -0.067 | 0 |
| 162 | 0.046  | 0.062 | -0.016 | 0 | 177 | 0.029  | 0.045 | -0.015 | 0 |
| 163 | 0.028  | 0.061 | -0.033 | 0 | 179 | 0.000  | 0.126 | -0.125 | 0 |
| 164 | 0.010  | 0.038 | -0.028 | 0 | 183 | -0.038 | 0.049 | -0.012 | 0 |
| 165 | 0.018  | 0.039 | -0.021 | 0 | 190 | 0.057  | 0.070 | -0.013 | 0 |
| 166 | -0.010 | 0.039 | -0.029 | 0 | 191 | 0.037  | 0.093 | -0.055 | 0 |
| 171 | 0.036  | 0.047 | -0.010 | 0 | 192 | 0.040  | 0.069 | -0.029 | 0 |
| 172 | 0.014  | 0.073 | -0.059 | 0 | 193 | 0.046  | 0.064 | -0.018 | 0 |
| 174 | -0.004 | 0.061 | -0.056 | 0 | 194 | 0.022  | 0.039 | -0.016 | 0 |
| 176 | -0.003 | 0.029 | -0.026 | 0 | 198 | 0.053  | 0.059 | -0.006 | 0 |
| 177 | 0.034  | 0.053 | -0.019 | 0 | 200 | -0.027 | 0.083 | -0.056 | 0 |
| 183 | -0.021 | 0.051 | -0.030 | 0 | 218 | 0.023  | 0.043 | -0.020 | 0 |
| 187 | 0.007  | 0.045 | -0.037 | 0 | 222 | 0.051  | 0.065 | -0.014 | 0 |
| 188 | 0.008  | 0.036 | -0.028 | 0 | 223 | 0.045  | 0.058 | -0.014 | 0 |
| 190 | -0.008 | 0.042 | -0.035 | 0 | 224 | 0.048  | 0.075 | -0.027 | 0 |
| 191 | -0.024 | 0.031 | -0.008 | 0 | 230 | 0.021  | 0.064 | -0.043 | 0 |
| 192 | 0.018  | 0.065 | -0.047 | 0 | 237 | -0.004 | 0.067 | -0.063 | 0 |
| 194 | -0.009 | 0.048 | -0.040 | 0 | 241 | -0.009 | 0.110 | -0.101 | 0 |
| 198 | 0.056  | 0.073 | -0.017 | 0 | 245 | 0.006  | 0.115 | -0.109 | 0 |
| 200 | 0.052  | 0.067 | -0.016 | 0 | 253 | 0.015  | 0.110 | -0.095 | 0 |
| 218 | 0.059  | 0.061 | -0.002 | 0 | 254 | 0.023  | 0.050 | -0.027 | 0 |
| 224 | 0.033  | 0.051 | -0.018 | 0 | 256 | 0.006  | 0.103 | -0.097 | 0 |
| 226 | 0.001  | 0.026 | -0.025 | 0 | 260 | -0.058 | 0.090 | -0.032 | 0 |
| 230 | -0.002 | 0.033 | -0.032 | 0 | 263 | 0.003  | 0.092 | -0.089 | 0 |
| 236 | -0.011 | 0.048 | -0.037 | 0 | 266 | 0.030  | 0.078 | -0.049 | 0 |
| 237 | -0.031 | 0.036 | -0.005 | 0 | 268 | 0.015  | 0.073 | -0.059 | 0 |
| 248 | 0.027  | 0.035 | -0.008 | 0 | 270 | -0.001 | 0.042 | -0.041 | 0 |
| 249 | 0.028  | 0.067 | -0.039 | 0 | 273 | 0.039  | 0.040 | -0.001 | 0 |
| 254 | -0.019 | 0.045 | -0.026 | 0 | 276 | 0.045  | 0.053 | -0.008 | 0 |
| 256 | -0.035 | 0.043 | -0.007 | 0 | 277 | 0.013  | 0.076 | -0.063 | 0 |
| 263 | -0.028 | 0.049 | -0.021 | 0 | 278 | 0.043  | 0.062 | -0.018 | 0 |
| 270 | 0.020  | 0.024 | -0.004 | 0 | 280 | 0.041  | 0.051 | -0.010 | 0 |
| 273 | -0.015 | 0.040 | -0.025 | 0 | 282 | 0.035  | 0.072 | -0.036 | 0 |
| 277 | -0.038 | 0.055 | -0.017 | 0 | 283 | 0.042  | 0.057 | -0.015 | 0 |
| 278 | 0.002  | 0.061 | -0.058 | 0 | 287 | 0.048  | 0.062 | -0.014 | 0 |
| 284 | 0.029  | 0.054 | -0.026 | 0 | 297 | 0.017  | 0.075 | -0.058 | 0 |
| 291 | -0.003 | 0.041 | -0.037 | 0 | 299 | 0.042  | 0.050 | -0.008 | 0 |
| 292 | 0.065  | 0.085 | -0.020 | 0 | 300 | 0.026  | 0.046 | -0.020 | 0 |
| 297 | 0.039  | 0.079 | -0.041 | 0 | 301 | 0.049  | 0.060 | -0.011 | 0 |
| 299 | 0.038  | 0.071 | -0.033 | 0 | 302 | 0.012  | 0.105 | -0.093 | 0 |
| 303 | 0.065  | 0.071 | -0.006 | 0 | 303 | 0.021  | 0.060 | -0.039 | 0 |
| 306 | 0.052  | 0.065 | -0.013 | 0 | 304 | 0.050  | 0.065 | -0.014 | 0 |
| 307 | 0.043  | 0.063 | -0.020 | 0 | 306 | 0.024  | 0.046 | -0.023 | 0 |
| 309 | 0.065  | 0.082 | -0.017 | 0 | 307 | 0.006  | 0.017 | -0.011 | 0 |
| 312 | 0.022  | 0.066 | -0.044 | 0 | 309 | 0.021  | 0.049 | -0.027 | 0 |
| 314 | -0.038 | 0.039 | -0.002 | 0 | 311 | 0.047  | 0.056 | -0.010 | 0 |
| 316 | 0.019  | 0.053 | -0.034 | 0 | 312 | 0.033  | 0.053 | -0.020 | 0 |
| 319 | 0.016  | 0.064 | -0.047 | 0 | 314 | -0.001 | 0.048 | -0.047 | 0 |
| 320 | -0.017 | 0.053 | -0.036 | 0 | 319 | -0.009 | 0.056 | -0.047 | 0 |
| 321 | -0.007 | 0.067 | -0.060 | 0 | 320 | -0.046 | 0.093 | -0.046 | 0 |
| 322 | -0.007 | 0.059 | -0.052 | 0 | 321 | -0.011 | 0.101 | -0.090 | 0 |
| 326 | 0.048  | 0.060 | -0.012 | 0 | 322 | -0.020 | 0.098 | -0.078 | 0 |
| 328 | 0.021  | 0.050 | -0.029 | 0 | 323 | -0.035 | 0.103 | -0.068 | 0 |
| 331 | 0.030  | 0.034 | -0.004 | 0 | 326 | 0.012  | 0.106 | -0.094 | 0 |
| 339 | 0.025  | 0.032 | -0.007 | 0 | 333 | 0.049  | 0.075 | -0.026 | 0 |
| 345 | 0.026  | 0.035 | -0.008 | 0 | 348 | 0.059  | 0.061 | -0.002 | 0 |
| 355 | 0.021  | 0.037 | -0.016 | 0 | 349 | -0.014 | 0.087 | -0.073 | 0 |
| 356 | 0.033  | 0.041 | -0.008 | 0 | 357 | 0.065  | 0.068 | -0.003 | 0 |
| 357 | 0.033  | 0.076 | -0.043 | 0 | 360 | 0.048  | 0.051 | -0.004 | 0 |
| 362 | -0.004 | 0.027 | -0.023 | 0 | 362 | 0.023  | 0.053 | -0.030 | 0 |
| 363 | -0.013 | 0.043 | -0.030 | 0 | 363 | 0.013  | 0.100 | -0.088 | 0 |
| 371 | 0.028  | 0.048 | -0.019 | 0 | 374 | 0.027  | 0.080 | -0.053 | 0 |
| 375 | 0.011  | 0.030 | -0.019 | 0 | 382 | 0.046  | 0.063 | -0.017 | 0 |
| 382 | -0.013 | 0.028 | -0.014 | 0 | 385 | 0.019  | 0.078 | -0.059 | 0 |
| 383 | 0.044  | 0.044 | -0.001 | 0 | 386 | 0.073  | 0.093 | -0.020 | 0 |
| 385 | 0.003  | 0.072 | -0.069 | 0 | 388 | 0.056  | 0.085 | -0.029 | 0 |
| 395 | -0.008 | 0.057 | -0.049 | 0 | 389 | 0.057  | 0.091 | -0.035 | 0 |
| 398 | -0.007 | 0.040 | -0.033 | 0 | 394 | 0.071  | 0.087 | -0.016 | 0 |
| 411 | -0.033 | 0.040 | -0.007 | 0 | 395 | 0.034  | 0.074 | -0.040 | 0 |
| 414 | 0.052  | 0.058 | -0.005 | 0 | 398 | 0.042  | 0.067 | -0.025 | 0 |
| 424 | -0.034 | 0.036 | -0.002 | 0 | 411 | 0.007  | 0.045 | -0.038 | 0 |



|     |        |       |        |   |     |        |       |        |   |
|-----|--------|-------|--------|---|-----|--------|-------|--------|---|
| 426 | 0.059  | 0.072 | -0.013 | 0 | 414 | 0.025  | 0.060 | -0.035 | 0 |
| 430 | 0.014  | 0.093 | -0.079 | 0 | 421 | 0.053  | 0.089 | -0.036 | 0 |
| 431 | -0.008 | 0.035 | -0.027 | 0 | 423 | 0.018  | 0.059 | -0.041 | 0 |
| 440 | -0.013 | 0.042 | -0.029 | 0 | 424 | 0.042  | 0.056 | -0.014 | 0 |
| 443 | -0.020 | 0.035 | -0.016 | 0 | 426 | -0.010 | 0.066 | -0.056 | 0 |
| 451 | -0.035 | 0.062 | -0.027 | 0 | 429 | -0.005 | 0.082 | -0.076 | 0 |
| 483 | 0.023  | 0.035 | -0.012 | 0 | 430 | -0.024 | 0.056 | -0.032 | 0 |
| 541 | 0.006  | 0.050 | -0.044 | 0 | 431 | 0.053  | 0.060 | -0.007 | 0 |
| 560 | 0.026  | 0.039 | -0.013 | 0 | 434 | -0.007 | 0.057 | -0.050 | 0 |
| 563 | 0.036  | 0.060 | -0.025 | 0 | 443 | -0.021 | 0.056 | -0.035 | 0 |
| 592 | -0.034 | 0.045 | -0.011 | 0 | 479 | 0.009  | 0.032 | -0.023 | 0 |
| 593 | -0.016 | 0.063 | -0.047 | 0 | 483 | 0.025  | 0.102 | -0.077 | 0 |
| 782 | 0.071  | 0.079 | -0.008 | 0 | 541 | -0.076 | 0.079 | -0.002 | 0 |
| 795 | -0.005 | 0.043 | -0.038 | 0 | 548 | 0.023  | 0.055 | -0.032 | 0 |
| 804 | 0.046  | 0.066 | -0.020 | 0 | 560 | 0.055  | 0.063 | -0.008 | 0 |
| 805 | 0.044  | 0.046 | -0.002 | 0 | 563 | 0.004  | 0.106 | -0.102 | 0 |
| 806 | 0.025  | 0.046 | -0.021 | 0 | 593 | -0.042 | 0.137 | -0.095 | 0 |
| 807 | 0.027  | 0.040 | -0.013 | 0 | 782 | 0.069  | 0.076 | -0.008 | 0 |
| 808 | 0.037  | 0.044 | -0.007 | 0 | 792 | 0.015  | 0.051 | -0.036 | 0 |
| 809 | 0.025  | 0.054 | -0.029 | 0 | 795 | 0.040  | 0.091 | -0.050 | 0 |
| 810 | 0.037  | 0.065 | -0.028 | 0 | 804 | 0.025  | 0.054 | -0.029 | 0 |
| 811 | 0.047  | 0.069 | -0.022 | 0 | 806 | 0.062  | 0.065 | -0.003 | 0 |
| 813 | 0.048  | 0.063 | -0.014 | 0 | 809 | 0.023  | 0.059 | -0.037 | 0 |
| 814 | 0.037  | 0.066 | -0.028 | 0 | 810 | 0.020  | 0.057 | -0.037 | 0 |
| 816 | 0.042  | 0.044 | -0.002 | 0 | 811 | 0.036  | 0.101 | -0.065 | 0 |
| 819 | -0.012 | 0.020 | -0.008 | 0 | 812 | 0.031  | 0.069 | -0.037 | 0 |
| 821 | -0.007 | 0.022 | -0.014 | 0 | 813 | -0.001 | 0.050 | -0.049 | 0 |
| 824 | 0.000  | 0.033 | -0.032 | 0 | 814 | 0.021  | 0.072 | -0.051 | 0 |
| 826 | -0.013 | 0.027 | -0.014 | 0 | 824 | 0.054  | 0.068 | -0.014 | 0 |
| 829 | 0.021  | 0.059 | -0.038 | 0 | 829 | 0.037  | 0.076 | -0.038 | 0 |
| 831 | 0.022  | 0.056 | -0.034 | 0 | 831 | 0.038  | 0.062 | -0.023 | 0 |
| 833 | -0.005 | 0.042 | -0.037 | 0 | 833 | 0.010  | 0.040 | -0.029 | 0 |
| 834 | -0.037 | 0.039 | -0.001 | 0 | 834 | -0.018 | 0.042 | -0.024 | 0 |

<sup>a</sup> Loading value from OPLS-DA model with controls vs dilated

<sup>b</sup> Jack-Knife confidence interval derived from cross-validation in OPLS-DA models

<sup>c</sup> Subtracting the jack-knife confidence intervals from the corresponding loading values, if positive indicates significance

<sup>d</sup> If the subtracting jack-knife confidence interval from the corresponding loading is positive (significant), and indicated with 1, and if negative (non-significant), it is indicated with 0

**Supplemental Table 3.** Summary of identification measures for 109 protein spots from MALDI TOF/TOF m/z derived from Prfound (Prowl) search engine. In some cases several spots are included and considered as one due to limited possibilities to separate the two spots from the 2D gel. Both empiric and experimental pI and Mw are shown. Multivariate data analysis statistics are also shown. Green and blue color indicate higher expression in dilated and non-dilated respectively. All models are made on TAV and BAV patients separately comparing dilated (D) and non-dilated (C) thoracic aorta tissues. Multivariate data analysis statistics are based on ABS (loading) – ABS (jack-knife confidence interval) values.

| Spot number | Protein accession number | Gene name | Meta probe set ID | Protein name                                                                                       | No of protein spots identified on gel | Experimental |    | In silica |        | Sequence Coverage (%) | No of peptides identified / No of possible peptides | Expectation value     | TAV               |                         | BAV               |                         |
|-------------|--------------------------|-----------|-------------------|----------------------------------------------------------------------------------------------------|---------------------------------------|--------------|----|-----------|--------|-----------------------|-----------------------------------------------------|-----------------------|-------------------|-------------------------|-------------------|-------------------------|
|             |                          |           |                   |                                                                                                    |                                       | pI           | Mw | pI        | MW     |                       |                                                     |                       | CvsD <sup>a</sup> | Fold (D-C) <sup>b</sup> | CvsD <sup>c</sup> | Fold (D-C) <sup>b</sup> |
| 90          | P02768                   | ALB       | 2731192           | Serum albumin                                                                                      | 11                                    | 5.77         | 62 | 6.1       | 71.37  | 7                     | 5/10                                                | 6.1x10 <sup>-4</sup>  | -1.05             |                         | 0.013             | 1.15                    |
| 94          |                          |           |                   |                                                                                                    |                                       | 5.55         | 59 | 6.1       | 71.37  | 13                    | 8/32                                                | 2.1x10 <sup>-4</sup>  | 0.040             | -1.23                   |                   | -1.07                   |
| 96          |                          |           |                   |                                                                                                    |                                       | 6.12         | 59 | 6.1       | 71.37  | 23                    | 11/26                                               | 1.9x10 <sup>-15</sup> |                   | 1.57                    |                   | 1.13                    |
| 97          |                          |           |                   |                                                                                                    |                                       | 6.03         | 59 | 6.1       | 71.37  | 15                    | 7/16                                                | 6.3x10 <sup>-8</sup>  |                   | 1.48                    | 0.006             | 1.20                    |
| 99          |                          |           |                   |                                                                                                    |                                       | 5.69         | 59 | 6.1       | 71.37  | 40                    | 19/25                                               | 8.1x10 <sup>-29</sup> |                   | -1.05                   |                   | -1.01                   |
| 100         |                          |           |                   |                                                                                                    |                                       | 5.62         | 59 | 6.1       | 71.37  | 17                    | 12/33                                               | 1.6x10 <sup>-10</sup> | 0.020             | -1.12                   |                   | -1.02                   |
| 101         |                          |           |                   |                                                                                                    |                                       | 5.49         | 59 | 6.1       | 71.37  | 35                    | 19/49                                               | 2.2x10 <sup>-13</sup> | 0.030             | -1.28                   |                   | -1.06                   |
| 105         |                          |           |                   |                                                                                                    |                                       | 5.95         | 59 | 6.1       | 71.37  | 23                    | 9/46                                                | 5.5x10 <sup>-7</sup>  |                   | 1.17                    |                   | 1.10                    |
| 109         |                          |           |                   |                                                                                                    |                                       | 5.86         | 59 | 6.1       | 71.37  | 43                    | 26/37                                               | 1.6x10 <sup>-34</sup> |                   | 1.06                    |                   | 1.05                    |
| 112         |                          |           |                   |                                                                                                    |                                       | 6.84         | 55 | 6.1       | 71.37  | 21                    | 8/27                                                | 1.7x10 <sup>-6</sup>  | 0.043             | 1.65                    | 0.011             | 1.17                    |
| 256         |                          |           |                   |                                                                                                    |                                       | 5.14         | 25 | 6.1       | 71.37  | 15                    | 12/37                                               | 1.6x10 <sup>-9</sup>  |                   | -1.12                   |                   | 1.03                    |
| 116_115     | P07437                   | TUBB      | 2901913           | Tubulin, beta                                                                                      | 3                                     | 4.85         | 53 | 4.7       | 50.11  | 26                    | 11/49                                               | 2.9x10 <sup>-6</sup>  | 0.024             | -1.24                   |                   | -1.15                   |
| 152         |                          |           |                   |                                                                                                    |                                       | 4.86         | 42 | 4.7       | 50.11  | 40                    | 25/42                                               | 3.4x10 <sup>-15</sup> | 0.013             | 1.16                    | 0.045             | 1.16                    |
| 153         |                          |           |                   |                                                                                                    |                                       | 4.89         | 42 | 4.7       | 50.11  | 52                    | 28/45                                               | 1.6x10 <sup>-17</sup> | 0.037             | 1.23                    | 0.017             | 1.11                    |
| 198         | P62736                   | ACTA2     | 3299504           | actin, aortic smooth muscle                                                                        | 6                                     | 4.92         | 33 | 5.2       | 42.39  | 18                    | 6/20                                                | 1.1x10 <sup>-4</sup>  |                   | 1.22                    |                   | 1.20                    |
| 203         |                          |           |                   |                                                                                                    |                                       | 4.97         | 33 | 5.2       | 42.39  | 29                    | 12/63                                               | 7.3x10 <sup>-6</sup>  | 0.056             | 1.40                    | 0.054             | 1.36                    |
| 207         |                          |           |                   |                                                                                                    |                                       | 5.03         | 33 | 5.2       | 42.39  | 28                    | 12/55                                               | 2.8x10 <sup>-8</sup>  | 0.044             | 1.43                    | 0.055             | 1.38                    |
| 762_761     |                          |           |                   |                                                                                                    |                                       | 5.28         | 32 | 5.2       | 42.39  | 21                    | 6/21                                                | 9.0x10 <sup>-5</sup>  | 0.049             | 1.37                    | 0.076             | 1.27                    |
| 769_771     |                          |           |                   |                                                                                                    |                                       | 5.09         | 33 | 5.2       | 42.39  | 37                    | 10/20                                               | 5.8x10 <sup>-14</sup> | 0.049             | 1.72                    | 0.058             | 1.54                    |
| 778_776     |                          |           |                   |                                                                                                    |                                       | 5.33         | 32 | 5.2       | 42.39  | 31                    | 10/22                                               | 6.5x10 <sup>-12</sup> | 0.050             | 1.46                    | 0.081             | 1.36                    |
| 282         | P27348                   | YWHAQ     | 2539869           | tyrosine 3-monooxygenase/tryptophan 5-monooxygenase activation protein (14-3-3 protein theta)      | 1                                     | 4.62         | 21 | 4.7       | 28.03  | 24                    | 8/43                                                | 4.0x10 <sup>-6</sup>  | 0.050             | 1.80                    |                   | 1.23                    |
| 287         | P63104                   | YWHAZ     | 3146898           | tyrosine 3-monooxygenase/tryptophan 5-monooxygenase activation protein (14-3-3 protein zeta/delta) | 2                                     | 4.66         | 21 | 4.7       | 27.90  | 24                    | 8/24                                                | 3.3x10 <sup>-11</sup> | 0.065             | 1.38                    |                   | 1.13                    |
| 291         | P31946                   | YWHAB     | 3886639           | tyrosine 3-monooxygenase/tryptophan 5-monooxygenase activation protein (14-3-3 protein beta/alpha) | 2                                     | 4.66         | 20 | 4.7       | 27.90  | 48                    | 12/35                                               | 3.2x10 <sup>-11</sup> |                   | -1.02                   | 0.029             | 1.12                    |
| 791         |                          |           |                   |                                                                                                    |                                       | 4.69         | 20 | 4.8       | 28.18  | 27                    | 11/30                                               | 7.9x10 <sup>-5</sup>  | 0.076             | 1.43                    | 0.001             | 1.12                    |
| 792         |                          |           |                   |                                                                                                    |                                       | 4.69         | 20 | 4.8       | 28.18  | 27                    | 7/20                                                | 1.0x10 <sup>-4</sup>  | 0.024             | 1.25                    |                   | 1.02                    |
| 224         | P04083                   | ANXA1     | 3174816           | annexin A1                                                                                         | 2                                     | 6.6          | 28 | 6.6       | 38.92  | 44                    | 13/33                                               | 1.7x10 <sup>-10</sup> |                   | 1.14                    |                   | 1.10                    |
| 268         | P09525                   | ANXA4     | 2487412           | annexin A4                                                                                         | 1                                     | 7.33         | 24 | 6.6       | 38.92  | 44                    | 13/28                                               | 2.4x10 <sup>-14</sup> | 0.030             | 1.42                    |                   | 1.04                    |
| 270         |                          |           |                   |                                                                                                    |                                       | 5.57         | 24 | 5.8       | 36.30  | 46                    | 17/31                                               | 2.6x10 <sup>-12</sup> |                   | 1.06                    |                   | 1.00                    |
| 273         | P08758                   | ANXA5     | 2784027           | annexin A5                                                                                         | 1                                     | 4.89         | 23 | 4.9       | 35.98  | 48                    | 15/63                                               | 1.8x10 <sup>-8</sup>  |                   | -1.04                   |                   | 1.08                    |
| 362         | P24844                   | MYL9      | 3883921           | myosin regulatory light polypeptide 9                                                              | 2                                     | 4.69         | 15 | 5.6       | 13.85  | 27                    | 4/14                                                | 1.3x10 <sup>-3</sup>  |                   | -1.07                   |                   | 1.06                    |
| 371         | O14950                   | MYL12B    | 3776449           | Myosin regulatory light chain 12B                                                                  | 2                                     | 4.74         | 15 | 5.6       | 13.85  | 42                    | 5/13                                                | 1.7x10 <sup>-4</sup>  |                   | 1.11                    | 0.026             | 1.22                    |
| 375         |                          |           |                   |                                                                                                    |                                       | 4.63         | 15 | 4.7       | 19.83  | 19                    | 5/10                                                | 3.3x10 <sup>-4</sup>  |                   | 1.05                    | 0.001             | 1.15                    |
| 383         |                          |           |                   |                                                                                                    |                                       | 4.66         | 14 | 4.7       | 19.83  | 19                    | 5/11                                                | 5.5x10 <sup>-4</sup>  |                   | 1.14                    | 0.012             | 1.14                    |
| 422         | P60660                   | MYL6      | 3417457           | myosin light polypeptide 6                                                                         | 1                                     | 4.48         | 13 | 4.6       | 15.80  | 43                    | 6/23                                                | 6.3x10 <sup>-9</sup>  | 0.026             | 1.47                    | 0.031             | 1.28                    |
| 58          | O43707                   | ACTN4     | 3832643           | alpha actinin 4                                                                                    | 5                                     | 5.21         | 76 | 5.3       | 102.25 | 20                    | 13/35                                               | 8.8x10 <sup>-7</sup>  | 0.063             | 1.44                    | 0.086             | 1.35                    |
| 59          |                          |           |                   |                                                                                                    |                                       | 5.19         | 76 | 5.3       | 102.25 | 27                    | 22/50                                               | 5.7x10 <sup>-13</sup> | 0.053             | 1.44                    | 0.087             | 1.35                    |
| 62          |                          |           |                   |                                                                                                    |                                       | 5.24         | 75 | 5.3       | 102.25 | 22                    | 15/48                                               | 2.2x10 <sup>-10</sup> | 0.062             | 1.42                    | 0.072             | 1.35                    |
| 755         |                          |           |                   |                                                                                                    |                                       | 5.16         | 76 | 5.2       | 105.29 | 18                    | 13/50                                               | 4.3x10 <sup>-6</sup>  | 0.053             | 1.48                    | 0.083             | 1.34                    |
| 754         |                          |           |                   |                                                                                                    |                                       | 5.14         | 76 | 5.3       | 105.29 | 26                    | 19/50                                               | 4.0x10 <sup>-8</sup>  | 0.055             | 1.46                    | 0.084             | 1.32                    |
| 64          | P12814                   | ACTN1     | 3569814           | alpha actinin 1                                                                                    | 2                                     | 5.29         | 74 | 5.3       | 102.69 | 12                    | 9/22                                                | 2.1x10 <sup>-9</sup>  | 0.051             | 1.44                    | 0.036             | 1.32                    |
| 65          |                          |           |                   |                                                                                                    |                                       | 5.26         | 74 | 5.3       | 102.69 | 33                    | 23/50                                               | 1.7x10 <sup>-13</sup> | 0.047             | 1.44                    | 0.049             | 1.34                    |
| 339         | Q01995                   | TAGLN     | 3350830           | transgelin                                                                                         | 5                                     | 7.99         | 16 | 8.9       | 22.65  | 69                    | 17/24                                               | 9.8x10 <sup>-15</sup> |                   | 1.19                    | 0.024             | 1.29                    |
| 345         |                          |           |                   |                                                                                                    |                                       | 7.84         | 16 | 8.9       | 22.65  | 62                    | 17/35                                               | 1.2x10 <sup>-13</sup> |                   | 1.18                    | 0.030             | 1.30                    |
| 355         |                          |           |                   |                                                                                                    |                                       | 7.34         | 16 | 8.9       | 22.65  | 57                    | 10/57                                               | 4.8x10 <sup>-6</sup>  |                   | 1.15                    | 0.034             | 1.27                    |
| 389         |                          |           |                   |                                                                                                    |                                       | 6.38         | 14 | 8.9       | 22.65  | 58                    | 17/42                                               | 1.1x10 <sup>-11</sup> | 0.030             | 1.49                    |                   | 1.29                    |
| 394         |                          |           |                   |                                                                                                    |                                       | 6.79         | 14 | 8.9       | 22.65  | 63                    | 18/33                                               | 5.7x10 <sup>-11</sup> | 0.022             | 1.41                    |                   | 1.34                    |
| 363         | P37802                   | TAGLN2    | 2439842           | Transgelin 2                                                                                       | 1                                     | 7.87         | 15 | 8.6       | 22.4   | 75                    | 18/48                                               | 1.1x10 <sup>-8</sup>  |                   | -1.12                   |                   | 1.02                    |
| 331         | P02743                   | APCS      | 2362651           | serum amyloid P-component precursor                                                                | 1                                     | 5.51         | 17 | 6.1       | 25.48  | 26                    | 6/14                                                | 2.0x10 <sup>-9</sup>  |                   | 1.10                    | 0.035             | 1.22                    |
| 412         | P09382                   | LGALS1    | 3944882           | galactin-1                                                                                         | 1                                     | 4.97         | 13 | 5.3       | 15.04  | 54                    | 8/17                                                | 1.1x10 <sup>-9</sup>  | 0.021             | 1.38                    | 0.049             | 1.27                    |
| 346         | Q99497                   | PARK7     | 2318736           | protein DJ-1                                                                                       | 1                                     | 6.18         | 16 | 6.3       | 20.04  | 35                    | 6/23                                                | 5.1x10 <sup>-3</sup>  | 0.030             | 1.27                    | 0.037             | 1.19                    |
| 47          | P06396                   | GSN       | 3187686           | gelsolin                                                                                           | 3                                     | 6.06         | 98 | 5.6       | 82.33  | 6                     | 5/11                                                | 1.1x10 <sup>-3</sup>  | 0.039             | 1.55                    | 0.021             | 1.23                    |
| 52          |                          |           |                   |                                                                                                    |                                       | 5.98         | 98 | 5.6       | 82.33  | 8                     | 6/18                                                | 3.9x10 <sup>-4</sup>  | 0.024             | 1.63                    | 0.039             | 1.38                    |
| 53          |                          |           |                   |                                                                                                    |                                       | 6.14         | 97 | 5.6       | 82.33  | 7                     | 6/14                                                | 3.8x10 <sup>-4</sup>  | 0.031             | 1.48                    | 0.010             | 1.26                    |
| 70          | P02787                   | TF        | 2643217           | transferrin                                                                                        | 4                                     | 6.18         | 66 | 7.1       | 76.94  | 6                     | 4/13                                                | 2.9x10 <sup>-3</sup>  |                   | 1.02                    |                   | 1.04                    |
| 71          |                          |           |                   |                                                                                                    |                                       | 6.45         | 66 | 7.1       | 76.94  | 10                    | 7/21                                                | 7.8x10 <sup>-4</sup>  |                   | 1.04                    |                   | 1.01                    |
| 72          |                          |           |                   |                                                                                                    |                                       | 6.35         | 66 | 7.1       | 76.94  | 11                    | 11/31                                               | 1.7x10 <sup>-4</sup>  |                   | 1.00                    |                   | 1.01                    |
| 75          |                          |           |                   |                                                                                                    |                                       | 6.55         | 65 | 7.1       | 76.94  | 13                    | 11/47                                               | 1.1x10 <sup>-3</sup>  |                   | 1.07                    |                   | 1.02                    |

|         |        |          |         |                                                         |   |      |    |     |        |    |       |                       |       |       |       |       |
|---------|--------|----------|---------|---------------------------------------------------------|---|------|----|-----|--------|----|-------|-----------------------|-------|-------|-------|-------|
| 155     | P02675 | FGB      | 2748542 | fibrinogen beta chain, isoform CRA_d                    | 1 | 7.26 | 42 | 8.7 | 52.77  | 18 | 7/17  | 2.1x10 <sup>-6</sup>  |       | 1.38  |       | 1.02  |
| 167     | P02679 | FGG      | 2790652 | fibrinogen gamma                                        | 1 | 5.61 | 39 | 5.5 | 46.83  | 10 | 4/13  | 4.9x10 <sup>-3</sup>  | 0.078 | 1.79  |       | 1.14  |
| 80      | P21980 | TGM2     | 3905145 | protein-glutamine gamma-glutamyltransferase 2 isoform a | 1 | 5.06 | 64 | 5.1 | 78.47  | 19 | 12/41 | 3.2x10 <sup>-6</sup>  | 0.004 | 1.28  |       | 1.10  |
| 231_233 | P04406 | GAPDH    | 3402625 | glyceraldehyde-3-phosphate dehydrogenase                | 2 | 7.85 | 27 | 8.4 | 36.21  | 24 | 7/14  | 8.9x10 <sup>-4</sup>  | 0.027 | 1.14  | 0.037 | 1.15  |
| 239     |        |          |         |                                                         |   | 7.47 | 27 | 8.4 | 36.21  | 26 | 6/17  | 2.6x10 <sup>-4</sup>  | 0.024 | 1.14  | 0.016 | 1.11  |
| 266     | P00338 | LDHA     | 3322775 | lactate dehydrogenase A variant                         | 1 | 7.67 | 25 | 8.7 | 36.82  | 18 | 8/19  | 3.1x10 <sup>-5</sup>  | 0.022 | 1.39  |       | 1.08  |
| 180     | P06733 | ENO1     | 2395490 | alpha-enolase isoform 1                                 | 3 | 6.72 | 36 | 7.0 | 47.49  | 43 | 16/30 | 7.7x10 <sup>-10</sup> | 0.006 | 1.21  | 0.070 | 1.24  |
| 182     |        |          |         |                                                         |   | 6.96 | 36 | 7.0 | 47.49  | 19 | 8/14  | 3.1x10 <sup>-8</sup>  | 0.025 | 1.30  | 0.050 | 1.25  |
| 185     |        |          |         |                                                         |   | 6.48 | 36 | 7.0 | 47.49  | 27 | 10/19 | 7.0x10 <sup>-9</sup>  | 0.028 | 1.20  | 0.026 | 1.15  |
| 76      | P08238 | HSP90AB1 | 2908474 | heat shock protein HSP 90-beta                          | 1 | 4.93 | 65 | 5   | 83.59  | 21 | 13/30 | 3.1x10 <sup>-9</sup>  | 0.083 | 1.80  | 0.063 | 1.28  |
| 316     | P04792 | HSPB1    | 3009399 | heat shock protein 27                                   | 2 | 6.01 | 18 | 8.1 | 22.42  | 40 | 8/14  | 1.4x10 <sup>-6</sup>  |       | 1.08  | 0.044 | 1.29  |
| 360     |        |          |         |                                                         |   | 5.62 | 15 | 8.1 | 22.42  | 32 | 6/15  | 1.5x10 <sup>-5</sup>  | 0.042 | 1.64  |       | 1.19  |
| 243     | P07951 | TPM2     | 3204721 | tropomyosin beta chain                                  | 3 | 4.61 | 26 | 4.6 | 32.97  | 12 | 7/14  | 1.6x10 <sup>-6</sup>  | 0.020 | 1.25  | 0.082 | 1.34  |
| 248     |        |          |         |                                                         |   | 4.64 | 26 | 4.6 | 32.97  | 28 | 11/70 | 6.4x10 <sup>-13</sup> |       | 1.12  | 0.042 | 1.25  |
| 280     |        |          |         |                                                         |   | 4.61 | 22 | 4.6 | 32.97  | 9  | 5/46  | 9.5x10 <sup>-6</sup>  | 0.039 | 1.27  |       | 1.10  |
| 462     | P68871 | HBB      | 3360401 | Hemoglobin subunit beta                                 | 7 | 6.75 | 10 | 6.8 | 15.94  | 69 | 9/18  | 2.4x10 <sup>-12</sup> | 0.052 | -2.48 | 0.036 | -1.56 |
| 465_484 |        |          |         |                                                         |   | 7.24 | 10 | 6.8 | 15.94  | 72 | 10/17 | 3.9x10 <sup>-15</sup> | 0.049 | -1.99 | 0.046 | -1.51 |
| 468     |        |          |         |                                                         |   | 6.9  | 10 | 6.8 | 15.94  | 69 | 10/39 | 2.7x10 <sup>-9</sup>  | 0.057 | -2.62 | 0.043 | -1.65 |
| 484     |        |          |         |                                                         |   | 7.26 | 9  | 6.8 | 15.94  | 69 | 10/52 | 5.4x10 <sup>-7</sup>  | 0.046 | -2.60 | 0.060 | -1.77 |
| 492     |        |          |         |                                                         |   | 6.9  | 9  | 6.8 | 15.94  | 53 | 7/16  | 1.7x10 <sup>-10</sup> | 0.053 | -3.06 | 0.062 | -1.89 |
| 747     |        |          |         |                                                         |   | 7.06 | 10 | 6.8 | 15.94  | 64 | 8/15  | 5.4x10 <sup>-12</sup> | 0.056 | -2.53 | 0.044 | -1.71 |
| 751     |        |          |         |                                                         |   | 7.07 | 9  | 6.8 | 15.94  | 56 | 8/21  | 2.1x10 <sup>-7</sup>  | 0.054 | -3.16 | 0.057 | -2.00 |
| 480     | P69905 | HBA1     | 3642675 | hemoglobin subunit alpha 1                              | 1 | 7.93 | 9  | 8.7 | 15.30  | 75 | 7/11  | 8.0x10 <sup>-9</sup>  | 0.042 | -2.45 | 0.044 | -1.70 |
| 488     | P02042 | HBD      | 3360417 | hemoglobin subunit delta                                | 1 | 7.6  | 9  | 8.0 | 16.15  | 80 | 11/26 | 6.0x10 <sup>-12</sup> | 0.044 | -2.58 | 0.045 | -1.76 |
| 117     | Q8WUP2 | FBLIM1   | 2322036 | filamin-binding LIM protein 1                           | 2 | 5.56 | 53 | 9.7 | 32.24  | 44 | 20/36 | 2.1x10 <sup>-15</sup> | 0.012 | -1.17 |       | -1.03 |
| 122     |        |          |         |                                                         |   | 5.43 | 52 | 9.7 | 32.24  | 37 | 8/17  | 2.6x10 <sup>-11</sup> |       | 1.02  | 0.021 | 1.13  |
| 322     | Q9Y696 | CLIC4    | 2325593 | chloride intracellular channel protein 4                | 1 | 5.43 | 18 | 5.5 | 28.98  | 34 | 8/19  | 1.4x10 <sup>-7</sup>  |       | -1.06 |       | -1.17 |
| 123     | P08670 | VIM      | 3236958 | vimentin                                                | 8 | 5.09 | 52 | 5.1 | 53.69  | 48 | 21/50 | 2.1x10 <sup>-7</sup>  | 0.005 | -1.17 |       | 1.08  |
| 164     |        |          |         |                                                         |   | 5    | 41 | 5.1 | 53.69  | 40 | 19/41 | 1.6x10 <sup>-12</sup> |       | 1.08  |       | 1.07  |
| 165     |        |          |         |                                                         |   | 5.08 | 41 | 5.1 | 53.69  | 38 | 17/33 | 5.5x10 <sup>-14</sup> |       | 1.13  |       | 1.13  |
| 166     |        |          |         |                                                         |   | 5.04 | 41 | 5.1 | 53.69  | 38 | 13/41 | 6.8x10 <sup>-7</sup>  |       | -1.08 |       | 1.06  |
| 170     |        |          |         |                                                         |   | 4.85 | 39 | 5.1 | 53.69  | 21 | 9/28  | 8.0x10 <sup>-7</sup>  | 0.009 | 1.36  |       | -1.10 |
| 171     |        |          |         |                                                         |   | 4.82 | 39 | 5.1 | 53.69  | 26 | 12/37 | 1.45x10 <sup>-6</sup> |       | 1.24  |       | -1.21 |
| 175     |        |          |         |                                                         |   | 4.78 | 37 | 5.1 | 53.69  | 24 | 14/41 | 5.2x10 <sup>-7</sup>  | 0.014 | 1.31  |       | -1.07 |
| 193     |        |          |         |                                                         |   | 4.68 | 35 | 5.1 | 53.69  | 25 | 14/51 | 8.1x10 <sup>-8</sup>  | 0.001 | 1.36  |       | 1.22  |
| 241     | A8MVM2 | MFAP4    | 3748798 | microfibrillar-associated protein 4                     | 2 | 4.79 | 26 | 5.4 | 29.00  | 18 | 6/63  | 0.046                 | 0.021 | -1.20 |       | -1.03 |
| 245     |        |          |         |                                                         |   | 4.88 | 26 | 5.4 | 29.06  | 17 | 6/25  | 4.5x10 <sup>-3</sup>  | 0.015 | -1.18 |       | 1.04  |
| 262     | Q69YN4 | KIAA1429 | 3145020 | KIAA1429 protein                                        | 1 | 5.68 | 25 | 6.0 | 122.55 | 4  | 4/16  | 0.24                  | 0.025 | 1.31  | 0.015 | 1.18  |
| 267     | Q7Z532 | OGN      | 3214800 | osteglycin OG                                           | 3 | 5.08 | 25 | 5.3 | 34.25  | 28 | 14/52 | 4.7x10 <sup>-12</sup> | 0.046 | -1.27 | 0.027 | -1.35 |
| 269     |        |          |         |                                                         |   | 5.2  | 24 | 5.3 | 34.25  | 28 | 13/43 | 6.7x10 <sup>-12</sup> | 0.041 | -1.23 | 0.032 | -1.26 |
| 272     |        |          |         |                                                         |   | 5.36 | 24 | 5.3 | 34.25  | 28 | 12/46 | 1.5x10 <sup>-7</sup>  | 0.032 | -1.16 | 0.008 | -1.16 |
| 148     | Q9GZM7 | TINAGL1  | 2328320 | tubulointerstitial nephritis antigen-like isoform 3     | 2 | 6.03 | 43 | 6.5 | 41.53  | 30 | 8/19  | 7.4x10 <sup>-8</sup>  | 0.032 | 1.25  |       | 1.02  |
| 149     |        |          |         |                                                         |   | 6.15 | 43 | 6.5 | 41.53  | 31 | 8/30  | 7.2x10 <sup>-11</sup> |       | 1.01  | 0.031 | 1.14  |
| 230     | Q53GG5 | PDLIM3   | 2796951 | PDZ and LIM domain protein 3 isoform b                  | 1 | 7.27 | 27 | 8.0 | 34.72  | 43 | 9/44  | 2.4x10 <sup>-5</sup>  |       | -1.00 |       | 1.04  |
| 451     | P02766 | TTR      | 3783565 | Transthyretin                                           | 1 | 5.45 | 10 | 5.5 | 15.99  | 50 | 6/19  | 5.0x10 <sup>-6</sup>  |       | -1.20 | 0.005 | -1.21 |
| 102     | P34931 | HSPA1L   | 2949450 | HSP70-1 (heat shock protein)                            | 3 | 5.43 | 59 | 5.5 | 70.31  | 17 | 9/40  | 3.0x10 <sup>-5</sup>  | 0.035 | -1.25 |       | -1.07 |
| 106     |        |          |         |                                                         |   | 5.37 | 59 | 5.5 | 70.31  | 25 | 13/40 | 1.9x10 <sup>-10</sup> | 0.020 | -1.20 |       | -1.06 |
| 107     |        |          |         |                                                         |   | 5.32 | 59 | 5.5 | 70.31  | 18 | 8/35  | 8.4x10 <sup>-5</sup>  |       | -1.11 |       | -1.04 |
| 119     | P13645 | KRT10    |         | keratin, type I cytoskeletal 10                         | 3 | 4.9  | 53 | 5.1 | 58.81  | 23 | 13/52 | 6.8x10 <sup>-7</sup>  | 0.027 | -1.24 |       | -1.02 |
| 222     |        |          |         |                                                         |   | 7.28 | 28 | 5.1 | 58.81  | 22 | 11/50 | 3.6x10 <sup>-7</sup>  | 0.049 | 1.37  |       | 1.15  |
| 252     |        |          |         |                                                         |   | 5.73 | 26 | 5.1 | 58.81  | 18 | 10/26 | 7.4x10 <sup>-10</sup> | 0.005 | 1.19  | 0.020 | 1.19  |
| 223     | P04259 | KRT6B    |         | keratin, type II cytoskeletal 6B                        | 1 | 6.95 | 28 | 8.3 | 60.05  | 14 | 8/45  | 4.0x10 <sup>-3</sup>  | 0.052 | 1.28  |       | 1.15  |

D = Dilated

C = Non-dilated

<sup>a</sup> ABS (loading)-ABS(jack-knife conf intervall) protein expression data, dilated higher (green), non-dilated higher (blue), TAV

<sup>b</sup> Difference in average mean protein spot expression between the groups indicated

<sup>c</sup> ABS (loading)-ABS(jack-knife conf intervall) protein expression data, dilated higher (green), non-dilated higher (blue), BAV

**Supplemental Table 4.** Summary of identification measures for 35 proteins from LC-MS/MS. All three pools for pool specific variables from the analysis are included.

| Accession | Gene name | Protein name                                  | MW [kDa] | calc. pI | # AAs | Pool 1    |             |                    |             |         | Pool 2    |             |                    |             |         | Pool 3    |             |                    |             |         |
|-----------|-----------|-----------------------------------------------|----------|----------|-------|-----------|-------------|--------------------|-------------|---------|-----------|-------------|--------------------|-------------|---------|-----------|-------------|--------------------|-------------|---------|
|           |           |                                               |          |          |       | ΣCoverage | Σ# Proteins | Σ# Unique Peptides | Σ# Peptides | Σ# PSMs | ΣCoverage | Σ# Proteins | Σ# Unique Peptides | Σ# Peptides | Σ# PSMs | ΣCoverage | Σ# Proteins | Σ# Unique Peptides | Σ# Peptides | Σ# PSMs |
| P12814    | ACTN1     | Alpha-actinin-1                               | 103.0    | 5.41     | 892   | 57.85     | 2           | 1                  | 40          | 258     | 58.30     | 3           | 22                 | 39          | 249     | 51.23     | 22          | 20                 | 38          | 237     |
| O43707    | ACTN4     | Alpha-actinin-4                               | 104.8    | 5.44     | 911   | 56.97     | 4           | 24                 | 40          | 251     | 60.48     | 4           | 26                 | 42          | 233     | 53.02     | 16          | 24                 | 41          | 219     |
| P02768    | ALB       | Serum albumin                                 | 69.3     | 6.28     | 609   | 74.71     | 2           | 47                 | 47          | 631     | 75.04     | 2           | 49                 | 49          | 747     | 76.35     | 2           | 50                 | 50          | 782     |
| P04083    | ANXA1     | Annexin A1                                    | 38.7     | 7.02     | 346   | 62.72     | 1           | 16                 | 16          | 80      | 60.98     | 1           | 17                 | 17          | 73      | 54.05     | 1           | 15                 | 15          | 62      |
| P09525    | ANXA4     | Annexin A4                                    | 35.9     | 6.13     | 319   | 5.02      | 1           | 2                  | 2           | 6       | 11.29     | 3           | 3                  | 4           | 8       | 4.39      | 1           | 2                  | 2           | 4       |
| P08758    | ANXA5     | Annexin A5                                    | 35.9     | 5.05     | 320   | 51.88     | 1           | 12                 | 12          | 80      | 53.75     | 3           | 14                 | 15          | 81      | 54.69     | 1           | 14                 | 14          | 79      |
| P02743    | APCS      | Serum amyloid P-component                     | 25.4     | 6.54     | 223   | 33.18     | 1           | 8                  | 8           | 81      | 34.08     | 1           | 9                  | 9           | 88      | 34.08     | 1           | 9                  | 9           | 87      |
| Q9Y696    | CLIC4     | Chloride intracellular channel protein 4      | 28.8     | 5.59     | 253   | 30.83     | 1           | 5                  | 5           | 15      | 20.55     | 1           | 3                  | 3           | 7       | 25.30     | 1           | 4                  | 4           | 9       |
| P06733    | ENO1      | Alpha-enolase                                 | 47.1     | 7.39     | 434   | 62.67     | 12          | 23                 | 24          | 164     | 55.76     | 5           | 20                 | 22          | 105     | 56.22     | 6           | 21                 | 21          | 101     |
| Q8WUP2    | FBLIM1    | Isoform 3 of Filamin-binding LIM protein 1    | 30.7     | 8.02     | 276   | 12.32     | 3           | 4                  | 4           | 14      | 10.87     | 3           | 3                  | 3           | 9       | 3.62      | 3           | 2                  | 2           | 6       |
| P02675    | FGB       | Fibrinogen beta chain                         | 55.9     | 8.27     | 491   | 20.16     | 1           | 9                  | 9           | 22      | 38.49     | 1           | 16                 | 16          | 56      | 33.81     | 1           | 15                 | 15          | 60      |
| P02679    | FGG       | Isoform Gamma-A of Fibrinogen gamma chain     | 49.5     | 6.09     | 437   | 26.54     | 4           | 9                  | 9           | 28      | 30.89     | 4           | 11                 | 11          | 35      | 29.29     | 2           | 10                 | 10          | 36      |
| P04406    | GAPDH     | Glyceraldehyde-3-phosphate dehydrogenase      | 36.0     | 8.46     | 335   | 63.28     | 1           | 16                 | 16          | 188     | 61.49     | 1           | 15                 | 15          | 174     | 58.21     | 1           | 14                 | 14          | 117     |
| P06396    | GSN       | Isoform 2 of Gelsolin                         | 80.6     | 5.85     | 731   | 41.86     | 2           | 26                 | 26          | 127     | 38.03     | 2           | 20                 | 20          | 88      | 32.97     | 2           | 22                 | 22          | 113     |
| P69905    | HBA1      | Hemoglobin subunit alpha                      | 15.2     | 8.68     | 142   | 55.63     | 2           | 7                  | 7           | 310     | 64.08     | 2           | 8                  | 8           | 355     | 64.08     | 2           | 8                  | 8           | 602     |
| P68871    | HBB       | Hemoglobin subunit beta                       | 16.0     | 7.28     | 147   | 78.91     | 4           | 6                  | 12          | 416     | 78.91     | 4           | 6                  | 12          | 350     | 78.91     | 4           | 6                  | 12          | 458     |
| P02042    | HBD       | Hemoglobin subunit delta                      | 16.0     | 8.05     | 147   | 70.75     | 4           | 4                  | 10          | 153     | 70.07     | 4           | 4                  | 10          | 153     | 78.91     | 4           | 5                  | 11          | 228     |
| P04792    | HSPB1     | Heat shock protein beta-1                     | 22.8     | 6.40     | 205   | 79.51     | 1           | 14                 | 14          | 114     | 79.51     | 1           | 13                 | 13          | 102     | 83.41     | 1           | 15                 | 15          | 102     |
| P00338    | LDHA      | L-lactate dehydrogenase A chain               | 36.7     | 8.27     | 332   | 43.37     | 6           | 12                 | 13          | 60      | 41.57     | 6           | 9                  | 10          | 54      | 35.54     | 6           | 9                  | 10          | 44      |
| P09382    | LGALS1    | Galectin-1                                    | 14.7     | 5.50     | 135   | 77.78     | 1           | 9                  | 9           | 98      | 77.78     | 1           | 9                  | 9           | 72      | 46.67     | 1           | 7                  | 7           | 56      |
| P60660    | MYL6      | Myosin light polypeptide 6                    | 16.9     | 4.65     | 151   | 66.89     | 6           | 10                 | 10          | 137     | 66.89     | 6           | 10                 | 10          | 104     | 66.89     | 6           | 10                 | 10          | 91      |
| P24844    | MYL9      | Myosin regulatory light polypeptide 9         | 19.8     | 4.92     | 172   | 66.28     | 1           | 4                  | 10          | 126     | 62.21     | 1           | 4                  | 9           | 110     | 66.28     | 1           | 4                  | 10          | 135     |
| Q99497    | PARK7     | Protein DJ-1                                  | 19.9     | 6.79     | 189   | 46.03     | 1           | 6                  | 6           | 15      | 38.10     | 1           | 5                  | 5           | 17      | 38.10     | 1           | 5                  | 5           | 13      |
| Q53GG5    | PDLM3     | Isoform 2 of PDZ and LIM domain protein 3     | 34.3     | 7.71     | 316   | 31.96     | 3           | 5                  | 5           | 12      | 19.62     | 3           | 4                  | 4           | 9       | 28.80     | 3           | 5                  | 5           | 13      |
| Q01995    | TAGLN     | Transgelin                                    | 22.6     | 8.84     | 201   | 81.09     | 1           | 20                 | 21          | 389     | 78.11     | 1           | 19                 | 20          | 317     | 83.58     | 1           | 20                 | 21          | 300     |
| P37802    | TAGLN2    | Transgelin-2                                  | 22.4     | 8.25     | 199   | 63.32     | 1           | 11                 | 12          | 111     | 67.34     | 1           | 12                 | 13          | 109     | 66.83     | 1           | 11                 | 12          | 97      |
| P02787    | TF        | Transferrin                                   | 77.0     | 7.12     | 698   | 55.30     | 1           | 30                 | 32          | 144     | 58.45     | 1           | 32                 | 33          | 165     | 55.30     | 1           | 31                 | 32          | 147     |
| P21980    | TGM2      | Protein-glutamine gamma-glutamyltransferase 2 | 77.3     | 5.22     | 687   | 24.75     | 3           | 12                 | 12          | 48      | 16.59     | 3           | 9                  | 9           | 41      | 16.01     | 3           | 9                  | 9           | 30      |
| Q9GZM7    | TINAGL1   | Tubulointerstitial nephritis antigen-like     | 52.4     | 6.99     | 467   | 14.13     | 2           | 5                  | 5           | 16      | 12.63     | 2           | 4                  | 4           | 18      | 6.21      | 2           | 2                  | 2           | 7       |
| P07951    | TPM2      | Isoform 2 of Tropomyosin beta chain           | 33.0     | 4.67     | 284   | 84.86     | 3           | 8                  | 41          | 459     | 77.82     | 3           | 9                  | 37          | 347     | 79.58     | 3           | 8                  | 38          | 427     |
| P02766    | TTR       | Transthyretin                                 | 15.9     | 5.76     | 147   | 13.61     | 7           | 3                  | 3           | 9       | 28.57     | 7           | 3                  | 3           | 10      | 12.93     | 7           | 2                  | 2           | 5       |
| P07437    | TUBB      | Tubulin beta chain                            | 49.6     | 4.89     | 444   | 51.13     | 5           | 3                  | 15          | 107     | 43.69     | 6           | 3                  | 13          | 95      | 43.69     | 5           | 3                  | 13          | 89      |
| P08670    | VIM*      | Vimentin                                      | 53.6     | 5.12     | 466   | 80.26     | 51          | 41                 | 45          | 939     | 80.90     | 29          | 46                 | 47          | 873     | 79.83     | 59          | 43                 | 44          | 947     |
| P31946    | YWHAB     | Isoform Short of 14-3-3 protein beta/alpha    | 27.8     | 4.83     | 244   | 27.46     | 5           | 2                  | 7           | 58      | 19.26     | 5           | 1                  | 5           | 46      | 19.26     | 8           | 1                  | 5           | 36      |
| P63104    | YWHAZ     | 14-3-3 protein zeta/delta                     | 27.7     | 4.79     | 245   | 40.00     | 1           | 5                  | 9           | 59      | 41.22     | 1           | 6                  | 9           | 50      | 31.43     | 3           | 4                  | 7           | 44      |

**Supplemental Table 5.** Loadings and jack-knife (JK) confidence intervals for the 35 proteins from LC-MS/MS analysis for both TAV and BAV OPLS-DA models, where diluted and non-diluted have been added as a Y variable. Only those proteins present in 2D gel analysis were extracted from LC-MS/MS data set.

| TAV model |                          |                            |                                                            |        |                                        | BAV model |                          |                            |                                                            |        |                                        |
|-----------|--------------------------|----------------------------|------------------------------------------------------------|--------|----------------------------------------|-----------|--------------------------|----------------------------|------------------------------------------------------------|--------|----------------------------------------|
| Gene      | Protein accession number | Loading value <sup>a</sup> | TAV model jack-knife (JK) confidence interval <sup>b</sup> |        | Significant probe set = 1 <sup>d</sup> | Gene      | Protein accession number | Loading value <sup>a</sup> | BAV model jack-knife (JK) confidence interval <sup>b</sup> |        | Significant probe set = 1 <sup>d</sup> |
|           |                          |                            | ABS(Loading value)-ABS(JK) <sup>c</sup>                    |        |                                        |           |                          |                            | ABS(Loading value)-ABS(JK) <sup>c</sup>                    |        |                                        |
| ACTN1     | P12814                   | 0.083                      | 0.189                                                      | -0.106 | 0                                      | ACTN1     | P12814                   | -0.231                     | 0.116                                                      | 0.115  | 1                                      |
| ACTN4     | O43707                   | 0.170                      | 0.178                                                      | -0.008 | 0                                      | ACTN4     | O43707                   | 0.255                      | 0.094                                                      | 0.161  | 1                                      |
| ALB       | P02768                   | -0.046                     | 0.251                                                      | -0.204 | 0                                      | ALB       | P02768                   | -0.083                     | 0.181                                                      | -0.097 | 0                                      |
| ANXA1     | P04083                   | 0.110                      | 0.263                                                      | -0.153 | 0                                      | ANXA1     | P04083                   | 0.158                      | 0.234                                                      | -0.075 | 0                                      |
| ANXA4     | P09525                   | -0.096                     | 0.155                                                      | -0.059 | 0                                      | ANXA4     | P09525                   | -0.110                     | 0.174                                                      | -0.064 | 0                                      |
| ANXA5     | P08758                   | -0.094                     | 0.203                                                      | -0.108 | 0                                      | ANXA5     | P08758                   | 0.001                      | 0.169                                                      | -0.168 | 0                                      |
| APCS      | P02743                   | -0.167                     | 0.213                                                      | -0.046 | 0                                      | APCS      | P02743                   | -0.075                     | 0.202                                                      | -0.127 | 0                                      |
| CLIC4     | Q9Y696                   | 0.068                      | 0.221                                                      | -0.153 | 0                                      | CLIC4     | Q9Y696                   | 0.061                      | 0.237                                                      | -0.176 | 0                                      |
| ENO1      | P06733                   | 0.240                      | 0.132                                                      | 0.108  | 1                                      | ENO1      | P06733                   | 0.207                      | 0.089                                                      | 0.117  | 1                                      |
| FBLIM1    | Q8WUP2                   | 0.105                      | 0.210                                                      | -0.105 | 0                                      | FBLIM1    | Q8WUP2                   | 0.223                      | 0.142                                                      | 0.082  | 1                                      |
| FGB       | P02675                   | 0.057                      | 0.272                                                      | -0.215 | 0                                      | FGB       | P02675                   | 0.058                      | 0.210                                                      | -0.152 | 0                                      |
| FGG       | P02679                   | 0.100                      | 0.265                                                      | -0.165 | 0                                      | FGG       | P02679                   | 0.071                      | 0.206                                                      | -0.135 | 0                                      |
| GAPDH     | P04406                   | 0.191                      | 0.162                                                      | 0.029  | 1                                      | GAPDH     | P04406                   | 0.089                      | 0.204                                                      | -0.115 | 0                                      |
| GSN       | P06396                   | -0.143                     | 0.216                                                      | -0.073 | 0                                      | GSN       | P06396                   | 0.194                      | 0.145                                                      | 0.049  | 1                                      |
| HBA1      | P69905                   | -0.303                     | 0.101                                                      | 0.202  | 1                                      | HBA1      | P69905                   | -0.250                     | 0.052                                                      | 0.198  | 1                                      |
| HBB       | P68871                   | -0.290                     | 0.144                                                      | 0.146  | 1                                      | HBB       | P68871                   | -0.214                     | 0.091                                                      | 0.123  | 1                                      |
| HBD       | P02042                   | -0.287                     | 0.150                                                      | 0.136  | 1                                      | HBD       | P02042                   | -0.209                     | 0.096                                                      | 0.113  | 1                                      |
| HSPB1     | P04792                   | 0.035                      | 0.234                                                      | -0.199 | 0                                      | HSPB1     | P04792                   | 0.155                      | 0.174                                                      | -0.018 | 0                                      |
| LDHA      | P00338                   | 0.291                      | 0.165                                                      | 0.126  | 1                                      | LDHA      | P00338                   | 0.078                      | 0.221                                                      | -0.143 | 0                                      |
| LGALS1    | P09382                   | 0.171                      | 0.165                                                      | 0.005  | 1                                      | LGALS1    | P09382                   | 0.240                      | 0.077                                                      | 0.163  | 1                                      |
| MYL6      | P60660                   | 0.207                      | 0.148                                                      | 0.059  | 1                                      | MYL6      | P60660                   | 0.263                      | 0.069                                                      | 0.194  | 1                                      |
| MYL9      | P24844                   | 0.083                      | 0.190                                                      | -0.107 | 0                                      | MYL9      | P24844                   | 0.244                      | 0.091                                                      | 0.152  | 1                                      |
| PARK7     | Q99497                   | 0.267                      | 0.075                                                      | 0.191  | 1                                      | PARK7     | Q99497                   | 0.231                      | 0.073                                                      | 0.158  | 1                                      |
| PDLIM3    | Q53GG5                   | 0.132                      | 0.194                                                      | -0.062 | 0                                      | PDLIM3    | Q53GG5                   | 0.106                      | 0.146                                                      | -0.040 | 0                                      |
| TAGLN     | Q01995                   | 0.115                      | 0.181                                                      | -0.067 | 0                                      | TAGLN     | Q01995                   | 0.257                      | 0.073                                                      | 0.184  | 1                                      |
| TAGLN2    | P37802                   | 0.294                      | 0.111                                                      | 0.183  | 1                                      | TAGLN2    | P37802                   | 0.239                      | 0.148                                                      | 0.091  | 1                                      |
| TF        | P02787                   | 0.063                      | 0.241                                                      | -0.178 | 0                                      | TF        | P02787                   | -0.023                     | 0.160                                                      | -0.137 | 0                                      |
| TGM2      | P21980                   | 0.068                      | 0.286                                                      | -0.218 | 0                                      | TGM2      | P21980                   | 0.081                      | 0.174                                                      | -0.092 | 0                                      |
| TINAGL1   | Q9GZM7                   | 0.115                      | 0.209                                                      | -0.094 | 0                                      | TINAGL1   | Q9GZM7                   | 0.102                      | 0.151                                                      | -0.049 | 0                                      |
| TPM2      | P07951                   | -0.041                     | 0.190                                                      | -0.149 | 0                                      | TPM2      | P07951                   | 0.179                      | 0.140                                                      | 0.039  | 1                                      |
| TTR       | P02766                   | 0.031                      | 0.219                                                      | -0.187 | 0                                      | TTR       | P02766                   | -0.136                     | 0.138                                                      | -0.002 | 0                                      |
| TUBB      | P07437                   | 0.296                      | 0.134                                                      | 0.162  | 1                                      | TUBB      | P07437                   | 0.065                      | 0.236                                                      | -0.171 | 0                                      |
| VIM       | P08670                   | -0.061                     | 0.265                                                      | -0.204 | 0                                      | VIM       | P08670                   | -0.144                     | 0.196                                                      | -0.052 | 0                                      |
| YWHAB     | P31946                   | -0.022                     | 0.221                                                      | -0.199 | 0                                      | YWHAB     | P31946                   | -0.062                     | 0.174                                                      | -0.112 | 0                                      |
| YWHAZ     | P63104                   | 0.205                      | 0.122                                                      | 0.082  | 1                                      | YWHAZ     | P63104                   | 0.206                      | 0.103                                                      | 0.103  | 1                                      |

<sup>a</sup> Loading value from OPLS-DA model with controls vs diluted

<sup>b</sup> Jack-Knife confidence interval derived from cross-validation in OPLS-DA models

<sup>c</sup> Subtracting the jack-knife confidence intervals from the corresponding loading values, if positive indicates significance

<sup>d</sup> If the subtracting jack-knife confidence interval from the corresponding loading is positive (significant), and indicated with 1, and if negative (non-significant), it is indicated with 0

**Supplemental Table 6.** Loadings and jack-knife (JK) confidence intervals for the 43 genes for both TAV and BAV OPLS-DA models, where dilated and non-dilated have been added as a Y variable.

| TAV model |               |                            |                                                  |                                         |                                        | BAV model |               |                            |                                                  |                                         |                                        |
|-----------|---------------|----------------------------|--------------------------------------------------|-----------------------------------------|----------------------------------------|-----------|---------------|----------------------------|--------------------------------------------------|-----------------------------------------|----------------------------------------|
| Gene      | Affymetrix ID | Loading value <sup>a</sup> | jack-knife (JK) confidence interval <sup>b</sup> | ABS>Loading value)-ABS(JK) <sup>c</sup> | Significant probe set = 1 <sup>d</sup> | Gene      | Affymetrix ID | Loading value <sup>a</sup> | jack-knife (JK) confidence interval <sup>b</sup> | ABS>Loading value)-ABS(JK) <sup>c</sup> | Significant probe set = 1 <sup>d</sup> |
| HBB       | 3360401       | -0.29                      | 0.08                                             | 0.21                                    | 1                                      | HBB       | 3360401       | -0.39                      | 0.14                                             | 0.25                                    | 1                                      |
| MYL6      | 3417457       | -0.26                      | 0.23                                             | 0.03                                    | 1                                      | FGG       | 2790652       | -0.31                      | 0.18                                             | 0.13                                    | 1                                      |
| APCS      | 2362651       | -0.20                      | 0.18                                             | 0.02                                    | 1                                      | LGALS1    | 3944882       | -0.30                      | 0.10                                             | 0.20                                    | 1                                      |
| FGG       | 2790652       | -0.17                      | 0.14                                             | 0.03                                    | 1                                      | MYL6      | 3417457       | -0.27                      | 0.13                                             | 0.13                                    | 1                                      |
| HBD       | 3360417       | -0.16                      | 0.14                                             | 0.02                                    | 1                                      | PARK7     | 2318736       | -0.24                      | 0.16                                             | 0.08                                    | 1                                      |
| YWHAZ     | 3146898       | -0.12                      | 0.08                                             | 0.03                                    | 1                                      | HBD       | 3360417       | -0.15                      | 0.14                                             | 0.02                                    | 1                                      |
| LDHA      | 3322775       | 0.12                       | 0.08                                             | 0.04                                    | 1                                      | TINAGL1   | 2328320       | 0.14                       | 0.11                                             | 0.03                                    | 1                                      |
| TUBB      | 2901913       | 0.16                       | 0.14                                             | 0.02                                    | 1                                      | HSPA1L    | 2949450       | 0.14                       | 0.12                                             | 0.02                                    | 1                                      |
| YWHAB     | 3886639       | 0.18                       | 0.14                                             | 0.03                                    | 1                                      | FBUM1     | 2322036       | 0.16                       | 0.09                                             | 0.07                                    | 1                                      |
| YWHAQ     | 2539869       | 0.19                       | 0.15                                             | 0.04                                    | 1                                      | HSPB1     | 3009399       | 0.18                       | 0.12                                             | 0.06                                    | 1                                      |
| TINAGL1   | 2328320       | 0.22                       | 0.16                                             | 0.05                                    | 1                                      | TUBB      | 2901913       | 0.21                       | 0.11                                             | 0.10                                    | 1                                      |
| TAGLN2    | 2439842       | 0.22                       | 0.10                                             | 0.12                                    | 1                                      | ACTN1     | 3569814       | 0.23                       | 0.13                                             | 0.10                                    | 1                                      |
| ACTN1     | 3569814       | 0.22                       | 0.15                                             | 0.07                                    | 1                                      | ACTN4     | 3832643       | 0.28                       | 0.11                                             | 0.16                                    | 1                                      |
| ENO1      | 2395490       | 0.25                       | 0.13                                             | 0.12                                    | 1                                      | MFAP4     | 3748798       | 0.31                       | 0.22                                             | 0.09                                    | 1                                      |
| ACTN4     | 3832643       | 0.28                       | 0.11                                             | 0.18                                    | 1                                      | ANXA1     | 3174816       | -0.12                      | 0.23                                             | -0.12                                   | 0                                      |
| MFAP4     | 3748798       | 0.32                       | 0.10                                             | 0.22                                    | 1                                      | GAPDH     | 3402625       | -0.10                      | 0.24                                             | -0.13                                   | 0                                      |
| LGALS1    | 3944882       | -0.20                      | 0.23                                             | -0.03                                   | 0                                      | TAGLN2    | 2439842       | -0.09                      | 0.17                                             | -0.08                                   | 0                                      |
| HBA1      | 3642675       | -0.17                      | 0.21                                             | -0.03                                   | 0                                      | YWHAZ     | 3146898       | -0.09                      | 0.21                                             | -0.12                                   | 0                                      |
| GAPDH     | 3402625       | -0.15                      | 0.20                                             | -0.05                                   | 0                                      | ANXA4     | 2487412       | -0.09                      | 0.31                                             | -0.22                                   | 0                                      |
| PARK7     | 2318736       | -0.14                      | 0.21                                             | -0.07                                   | 0                                      | PDUM3     | 2796951       | -0.08                      | 0.23                                             | -0.15                                   | 0                                      |
| ANXA1     | 3174816       | -0.12                      | 0.15                                             | -0.03                                   | 0                                      | FGB       | 2748542       | -0.07                      | 0.26                                             | -0.19                                   | 0                                      |
| OGN       | 3214800       | -0.10                      | 0.18                                             | -0.08                                   | 0                                      | MYL12B    | 3776449       | -0.05                      | 0.16                                             | -0.11                                   | 0                                      |
| FGB       | 2748542       | -0.08                      | 0.18                                             | -0.10                                   | 0                                      | TTR       | 3783565       | -0.03                      | 0.28                                             | -0.25                                   | 0                                      |
| TAGLN     | 3350830       | -0.08                      | 0.26                                             | -0.18                                   | 0                                      | ANXA5     | 2784027       | -0.02                      | 0.29                                             | -0.28                                   | 0                                      |
| HSPA1L    | 2949450       | -0.06                      | 0.25                                             | -0.18                                   | 0                                      | APCS      | 2362651       | -0.01                      | 0.26                                             | -0.24                                   | 0                                      |
| VIM       | 3236958       | -0.06                      | 0.20                                             | -0.14                                   | 0                                      | OGN       | 3214800       | -0.01                      | 0.16                                             | -0.15                                   | 0                                      |
| HSPB1     | 3009399       | -0.02                      | 0.22                                             | -0.20                                   | 0                                      | CLIC4     | 2325593       | -0.01                      | 0.28                                             | -0.28                                   | 0                                      |
| ALB       | 2731192       | -0.02                      | 0.17                                             | -0.15                                   | 0                                      | LDHA      | 3322775       | 0.00                       | 0.16                                             | -0.15                                   | 0                                      |
| TTR       | 3783565       | 0.01                       | 0.06                                             | -0.05                                   | 0                                      | VIM       | 3236958       | 0.01                       | 0.13                                             | -0.13                                   | 0                                      |
| TF        | 2643217       | 0.03                       | 0.20                                             | -0.17                                   | 0                                      | ALB       | 2731192       | 0.01                       | 0.10                                             | -0.09                                   | 0                                      |
| CLIC4     | 2325593       | 0.03                       | 0.26                                             | -0.23                                   | 0                                      | KIAA1429  | 3145020       | 0.01                       | 0.23                                             | -0.22                                   | 0                                      |
| FBUM1     | 2322036       | 0.03                       | 0.21                                             | -0.17                                   | 0                                      | TAGLN     | 3350830       | 0.02                       | 0.12                                             | -0.10                                   | 0                                      |
| TPM2      | 3204721       | 0.04                       | 0.21                                             | -0.17                                   | 0                                      | TPM2      | 3204721       | 0.03                       | 0.19                                             | -0.16                                   | 0                                      |
| ANXA4     | 2487412       | 0.07                       | 0.19                                             | -0.12                                   | 0                                      | HSP90AB1  | 2908474       | 0.04                       | 0.29                                             | -0.25                                   | 0                                      |
| GSN       | 3187686       | 0.08                       | 0.12                                             | -0.04                                   | 0                                      | GSN       | 3187686       | 0.07                       | 0.22                                             | -0.15                                   | 0                                      |
| MYL12B    | 3776449       | 0.08                       | 0.16                                             | -0.08                                   | 0                                      | YWHAB     | 3886639       | 0.07                       | 0.21                                             | -0.13                                   | 0                                      |
| KIAA1429  | 3145020       | 0.09                       | 0.21                                             | -0.12                                   | 0                                      | YWHAQ     | 2539869       | 0.08                       | 0.21                                             | -0.13                                   | 0                                      |
| ANXA5     | 2784027       | 0.10                       | 0.16                                             | -0.07                                   | 0                                      | HBA1      | 3642675       | 0.08                       | 0.25                                             | -0.17                                   | 0                                      |
| MYL9      | 3883921       | 0.11                       | 0.22                                             | -0.11                                   | 0                                      | TF        | 2643217       | 0.12                       | 0.22                                             | -0.10                                   | 0                                      |
| PDUM3     | 2796951       | 0.11                       | 0.23                                             | -0.12                                   | 0                                      | ACTA2     | 3299504       | 0.12                       | 0.12                                             | 0.00                                    | 0                                      |
| ACTA2     | 3299504       | 0.11                       | 0.16                                             | -0.04                                   | 0                                      | MYL9      | 3883921       | 0.15                       | 0.22                                             | -0.07                                   | 0                                      |
| HSP90AB1  | 2908474       | 0.12                       | 0.20                                             | -0.07                                   | 0                                      | ENO1      | 2395490       | 0.18                       | 0.21                                             | -0.02                                   | 0                                      |
| TGM2      | 3905145       | 0.14                       | 0.18                                             | -0.04                                   | 0                                      | TGM2      | 3905145       | 0.19                       | 0.20                                             | -0.002                                  | 0                                      |

<sup>a</sup> Loading value from OPLS-DA model with controls vs dilated

<sup>b</sup> Jack-Knife confidence interval derived from cross-validation in OPLS-DA models

<sup>c</sup> Subtracting the jack-knife confidence intervals from the corresponding loading values, if positive indicates significance

<sup>d</sup> If the subtracting jack-knife confidence interval from the corresponding loading is positive (significant), and indicated with 1, and if negative (non-significant), it is indicated with 0

**Supplemental Table 7.** Loadings and jack-knife (JK) confidence intervals for the 393 probe sets for both TAV and BAV OPLS-DA models, where dilated and non-dilated have been added as a Y variable.

| TAV model    |               |                            |                                                  |                                         | BAV model                              |              |               |                            |                                                  |                                         |                                        |
|--------------|---------------|----------------------------|--------------------------------------------------|-----------------------------------------|----------------------------------------|--------------|---------------|----------------------------|--------------------------------------------------|-----------------------------------------|----------------------------------------|
| Probe set ID | Affymetrix ID | Loading value <sup>a</sup> | jack-knife (JK) confidence interval <sup>b</sup> | ABS>Loading value)-ABS(JK) <sup>c</sup> | Significant probe set = 1 <sup>d</sup> | Probe set ID | Affymetrix ID | Loading value <sup>a</sup> | jack-knife (JK) confidence interval <sup>b</sup> | ABS>Loading value)-ABS(JK) <sup>c</sup> | Significant probe set = 1 <sup>d</sup> |
| ACTN1_21     | 3569871       | -0.128                     | 0.042                                            | 0.085                                   | 1                                      | TINAGL1_15   | 2328365       | -0.174                     | 0.092                                            | 0.082                                   | 1                                      |
| GSN_5        | 3187729       | -0.126                     | 0.042                                            | 0.084                                   | 1                                      | ACTA2_1      | 3299507       | -0.156                     | 0.073                                            | 0.082                                   | 1                                      |
| TGM2_16      | 3905184       | -0.112                     | 0.043                                            | 0.070                                   | 1                                      | HBD_2        | 3360423       | -0.149                     | 0.054                                            | 0.096                                   | 1                                      |
| OGN_8        | 3214813       | -0.110                     | 0.023                                            | 0.087                                   | 1                                      | YWHAB_1      | 3886640       | -0.136                     | 0.084                                            | 0.052                                   | 1                                      |
| GSN_6        | 3187731       | -0.110                     | 0.065                                            | 0.045                                   | 1                                      | FBLIM1_5     | 2322051       | -0.135                     | 0.080                                            | 0.055                                   | 1                                      |
| TPM2_13      | 3204742       | -0.108                     | 0.066                                            | 0.042                                   | 1                                      | HBB_1        | 3360403       | -0.122                     | 0.056                                            | 0.066                                   | 1                                      |
| HBD_2        | 3360423       | -0.106                     | 0.045                                            | 0.061                                   | 1                                      | FBLIM1_3     | 2322047       | -0.119                     | 0.061                                            | 0.059                                   | 1                                      |
| ACTN1_22     | 3569908       | -0.104                     | 0.035                                            | 0.069                                   | 1                                      | ANXA4_15     | 2487456       | -0.117                     | 0.074                                            | 0.043                                   | 1                                      |
| ACTA2_3      | 3299513       | -0.103                     | 0.047                                            | 0.056                                   | 1                                      | TF_12        | 2643264       | -0.111                     | 0.052                                            | 0.059                                   | 1                                      |
| MYL9_1       | 3883922       | -0.101                     | 0.039                                            | 0.062                                   | 1                                      | TPM2_1       | 3204722       | -0.107                     | 0.052                                            | 0.055                                   | 1                                      |
| ACTN4_1      | 3832644       | -0.099                     | 0.067                                            | 0.031                                   | 1                                      | KIAA1429_18  | 3145051       | -0.107                     | 0.089                                            | 0.018                                   | 1                                      |
| OGN_10       | 3214815       | -0.097                     | 0.046                                            | 0.051                                   | 1                                      | ACTN1_20     | 3569864       | -0.106                     | 0.039                                            | 0.068                                   | 1                                      |
| GSN_7        | 3187735       | -0.092                     | 0.075                                            | 0.017                                   | 1                                      | TF_20        | 2643279       | -0.104                     | 0.055                                            | 0.048                                   | 1                                      |
| YWHAB_3      | 3886644       | -0.091                     | 0.035                                            | 0.056                                   | 1                                      | ACTN1_22     | 3569908       | -0.102                     | 0.051                                            | 0.051                                   | 1                                      |
| TINAGL1_13   | 2328363       | -0.090                     | 0.040                                            | 0.050                                   | 1                                      | GSN_2        | 3187720       | -0.100                     | 0.056                                            | 0.044                                   | 1                                      |
| GSN_8        | 3187739       | -0.090                     | 0.042                                            | 0.048                                   | 1                                      | GSN_3        | 3187721       | -0.099                     | 0.054                                            | 0.045                                   | 1                                      |
| TINAGL1_15   | 2328365       | -0.090                     | 0.083                                            | 0.007                                   | 1                                      | LGALS1_3     | 3944897       | -0.099                     | 0.078                                            | 0.020                                   | 1                                      |
| ACTN1_15     | 3569849       | -0.089                     | 0.024                                            | 0.066                                   | 1                                      | TINAGL1_13   | 2328363       | -0.098                     | 0.074                                            | 0.024                                   | 1                                      |
| KIAA1429_28  | 3145067       | -0.089                     | 0.031                                            | 0.058                                   | 1                                      | VIM_15       | 3237001       | -0.097                     | 0.091                                            | 0.006                                   | 1                                      |
| TGM2_17      | 3905187       | -0.089                     | 0.076                                            | 0.012                                   | 1                                      | KIAA1429_29  | 3145069       | -0.093                     | 0.036                                            | 0.057                                   | 1                                      |
| KIAA1429_26  | 3145060       | -0.088                     | 0.044                                            | 0.044                                   | 1                                      | ALB_1        | 2731194       | -0.093                     | 0.046                                            | 0.047                                   | 1                                      |
| PDLIM3_10    | 2796976       | -0.086                     | 0.040                                            | 0.046                                   | 1                                      | PARK7_5      | 2318755       | -0.092                     | 0.052                                            | 0.040                                   | 1                                      |
| ACTN4_7      | 3832688       | -0.086                     | 0.063                                            | 0.023                                   | 1                                      | ACTN4_1      | 3832644       | -0.088                     | 0.060                                            | 0.028                                   | 1                                      |
| MFAP4_2      | 3748801       | -0.085                     | 0.069                                            | 0.016                                   | 1                                      | TPM2_13      | 3204742       | -0.087                     | 0.054                                            | 0.033                                   | 1                                      |
| HBB_3        | 3360405       | -0.081                     | 0.064                                            | 0.017                                   | 1                                      | KIAA1429_13  | 3145042       | -0.087                     | 0.070                                            | 0.017                                   | 1                                      |
| GSN_2        | 3187720       | -0.081                     | 0.051                                            | 0.030                                   | 1                                      | TF_8         | 2643251       | -0.087                     | 0.076                                            | 0.011                                   | 1                                      |
| ANXA4_14     | 2487454       | -0.081                     | 0.035                                            | 0.047                                   | 1                                      | KIAA1429_1   | 3145023       | -0.083                     | 0.049                                            | 0.034                                   | 1                                      |
| PDLIM3_11    | 2796978       | -0.080                     | 0.048                                            | 0.032                                   | 1                                      | ENO1_2       | 2395499       | -0.081                     | 0.073                                            | 0.008                                   | 1                                      |
| GSN_3        | 3187721       | -0.079                     | 0.055                                            | 0.024                                   | 1                                      | MYL9_1       | 3883922       | -0.081                     | 0.079                                            | 0.002                                   | 1                                      |
| TF_12        | 2643264       | -0.077                     | 0.051                                            | 0.026                                   | 1                                      | HBB_3        | 3360405       | -0.080                     | 0.075                                            | 0.005                                   | 1                                      |
| ENO1_2       | 2395499       | -0.075                     | 0.064                                            | 0.012                                   | 1                                      | HSPA1L_2     | 2949452       | -0.080                     | 0.053                                            | 0.027                                   | 1                                      |
| HSPB1_3      | 3009406       | -0.074                     | 0.063                                            | 0.012                                   | 1                                      | MYL6_2       | 3417476       | -0.079                     | 0.049                                            | 0.030                                   | 1                                      |
| ACTN1_18     | 3569860       | -0.074                     | 0.030                                            | 0.044                                   | 1                                      | TF_1         | 2643237       | -0.077                     | 0.047                                            | 0.030                                   | 1                                      |
| PDLIM3_12    | 2796986       | -0.073                     | 0.051                                            | 0.021                                   | 1                                      | PDLIM3_11    | 2796978       | -0.074                     | 0.067                                            | 0.008                                   | 1                                      |
| TGM2_15      | 3905180       | -0.071                     | 0.055                                            | 0.015                                   | 1                                      | ANXA4_9      | 2487439       | -0.073                     | 0.044                                            | 0.029                                   | 1                                      |
| LDHA_1       | 3322777       | -0.070                     | 0.058                                            | 0.013                                   | 1                                      | PDLIM3_12    | 2796986       | -0.071                     | 0.034                                            | 0.037                                   | 1                                      |
| ANXA5_13     | 2784072       | -0.070                     | 0.066                                            | 0.004                                   | 1                                      | OGN_10       | 3214815       | -0.071                     | 0.028                                            | 0.043                                   | 1                                      |
| MFAP4_8      | 3748807       | -0.070                     | 0.061                                            | 0.009                                   | 1                                      | KIAA1429_28  | 3145067       | -0.070                     | 0.053                                            | 0.017                                   | 1                                      |
| TGM2_14      | 3905179       | -0.068                     | 0.056                                            | 0.012                                   | 1                                      | VIM_16       | 3237002       | -0.068                     | 0.030                                            | 0.039                                   | 1                                      |
| MFAP4_6      | 3748805       | -0.068                     | 0.056                                            | 0.012                                   | 1                                      | YWHAQ_1      | 2539873       | -0.065                     | 0.063                                            | 0.002                                   | 1                                      |
| HBB_1        | 3360403       | -0.065                     | 0.038                                            | 0.027                                   | 1                                      | YWHAZ_2      | 3146941       | -0.065                     | 0.053                                            | 0.011                                   | 1                                      |
| FBLIM1_3     | 2322047       | -0.065                     | 0.054                                            | 0.010                                   | 1                                      | TINAGL1_1    | 2328342       | -0.055                     | 0.034                                            | 0.022                                   | 1                                      |
| KIAA1429_31  | 3145076       | -0.063                     | 0.048                                            | 0.015                                   | 1                                      | MFAP4_2      | 3748801       | -0.055                     | 0.052                                            | 0.002                                   | 1                                      |
| ACTN4_5      | 3832685       | -0.062                     | 0.057                                            | 0.005                                   | 1                                      | MFAP4_3      | 3748802       | -0.054                     | 0.043                                            | 0.011                                   | 1                                      |
| YWHAB_6      | 3886652       | -0.061                     | 0.048                                            | 0.014                                   | 1                                      | YWHAB_3      | 3886644       | -0.051                     | 0.047                                            | 0.003                                   | 1                                      |
| YWHAB_5      | 3886650       | -0.060                     | 0.047                                            | 0.013                                   | 1                                      | ACTN4_14     | 3832703       | -0.049                     | 0.041                                            | 0.008                                   | 1                                      |
| FGG_5        | 2790662       | -0.057                     | 0.027                                            | 0.030                                   | 1                                      | ACTN1_18     | 3569860       | -0.048                     | 0.040                                            | 0.009                                   | 1                                      |
| FBLIM1_5     | 2322051       | -0.055                     | 0.036                                            | 0.019                                   | 1                                      | VIM_17       | 3237003       | -0.045                     | 0.034                                            | 0.011                                   | 1                                      |
| YWHAQ_4      | 2539900       | -0.054                     | 0.040                                            | 0.014                                   | 1                                      | FGG_7        | 2790664       | -0.045                     | 0.042                                            | 0.003                                   | 1                                      |
| GSN_10       | 3187742       | -0.052                     | 0.044                                            | 0.008                                   | 1                                      | MFAP4_1      | 3748799       | -0.040                     | 0.027                                            | 0.013                                   | 1                                      |
| HSPA1L_3     | 2949453       | -0.046                     | 0.036                                            | 0.010                                   | 1                                      | OGN_9        | 3214814       | -0.037                     | 0.021                                            | 0.016                                   | 1                                      |
| ANXA4_7      | 2487431       | -0.046                     | 0.042                                            | 0.004                                   | 1                                      | YWHAB_8      | 3886656       | 0.034                      | 0.030                                            | 0.004                                   | 1                                      |
| ANXA5_10     | 2784065       | -0.040                     | 0.037                                            | 0.004                                   | 1                                      | ACTN4_16     | 3832719       | 0.036                      | 0.032                                            | 0.004                                   | 1                                      |
| ANXA5_11     | 2784066       | -0.038                     | 0.023                                            | 0.014                                   | 1                                      | FGG_13       | 2790678       | 0.039                      | 0.035                                            | 0.004                                   | 1                                      |
| FGG_8        | 2790667       | 0.043                      | 0.042                                            | 0.001                                   | 1                                      | ANXA4_2      | 2487420       | 0.041                      | 0.022                                            | 0.019                                   | 1                                      |
| ACTN1_1      | 3569819       | 0.045                      | 0.042                                            | 0.003                                   | 1                                      | APCS_6       | 2362658       | 0.041                      | 0.040                                            | 0.001                                   | 1                                      |
| ACTN1_12     | 3569841       | 0.046                      | 0.030                                            | 0.016                                   | 1                                      | PDLIM3_6     | 2796967       | 0.042                      | 0.036                                            | 0.006                                   | 1                                      |
| TAGLN_11     | 3350846       | 0.048                      | 0.033                                            | 0.015                                   | 1                                      | PARK7_2      | 2318747       | 0.044                      | 0.032                                            | 0.013                                   | 1                                      |
| TPM2_9       | 3204737       | 0.048                      | 0.041                                            | 0.007                                   | 1                                      | MYL6_1       | 3417469       | 0.048                      | 0.041                                            | 0.007                                   | 1                                      |
| VIM_8        | 3236987       | 0.049                      | 0.033                                            | 0.016                                   | 1                                      | VIM_8        | 3236987       | 0.049                      | 0.044                                            | 0.005                                   | 1                                      |
| TAGLN_5      | 3350840       | 0.049                      | 0.032                                            | 0.017                                   | 1                                      | KIAA1429_11  | 3145039       | 0.051                      | 0.050                                            | 0.001                                   | 1                                      |
| GSN_14       | 3187751       | 0.051                      | 0.025                                            | 0.026                                   | 1                                      | GSN_11       | 3187744       | 0.053                      | 0.039                                            | 0.014                                   | 1                                      |
| VIM_13       | 3236999       | 0.053                      | 0.048                                            | 0.004                                   | 1                                      | ANXA4_5      | 2487428       | 0.058                      | 0.037                                            | 0.021                                   | 1                                      |
| HBD_3        | 3360426       | 0.056                      | 0.047                                            | 0.009                                   | 1                                      | ANXA4_4      | 2487427       | 0.058                      | 0.054                                            | 0.005                                   | 1                                      |
| KIAA1429_18  | 3145051       | 0.056                      | 0.040                                            | 0.016                                   | 1                                      | ACTN1_13     | 3569842       | 0.059                      | 0.028                                            | 0.031                                   | 1                                      |
| ANXA5_2      | 2784038       | 0.057                      | 0.052                                            | 0.005                                   | 1                                      | TPM2_4       | 3204728       | 0.060                      | 0.031                                            | 0.029                                   | 1                                      |
| ANXA4_15     | 2487456       | 0.058                      | 0.045                                            | 0.013                                   | 1                                      | OGN_2        | 3214804       | 0.062                      | 0.042                                            | 0.020                                   | 1                                      |
| ACTN1_2      | 3569820       | 0.061                      | 0.051                                            | 0.010                                   | 1                                      | TF_21        | 2643280       | 0.063                      | 0.062                                            | 0.001                                   | 1                                      |
| YWHAB_2      | 3886643       | 0.064                      | 0.062                                            | 0.002                                   | 1                                      | TGM2_2       | 3905147       | 0.063                      | 0.055                                            | 0.007                                   | 1                                      |
| HBB_2        | 3360404       | 0.065                      | 0.057                                            | 0.009                                   | 1                                      | VIM_9        | 3236988       | 0.064                      | 0.041                                            | 0.023                                   | 1                                      |
| TGM2_4       | 3905150       | 0.066                      | 0.066                                            | 0.000                                   | 1                                      | TF_18        | 2643275       | 0.066                      | 0.065                                            | 0.001                                   | 1                                      |
| LDHA_2       | 3322803       | 0.068                      | 0.048                                            | 0.020                                   | 1                                      | PDLIM3_13    | 2796987       | 0.066                      | 0.061                                            | 0.005                                   | 1                                      |
| OGN_5        | 3214807       | 0.068                      | 0.049                                            | 0.019                                   | 1                                      | HBD_4        | 3360427       | 0.068                      | 0.038                                            | 0.030                                   | 1                                      |
| TAGLN_7      | 3350842       | 0.069                      | 0.063                                            | 0.006                                   | 1                                      | ANXA4_7      | 2487431       | 0.069                      | 0.053                                            | 0.016                                   | 1                                      |
| YWHAB_10     | 3886658       | 0.069                      | 0.065                                            | 0.004                                   | 1                                      | MFAP4_5      | 3748804       | 0.069                      | 0.067                                            | 0.002                                   | 1                                      |
| KIAA1429_10  | 3145036       | 0.070                      | 0.068                                            | 0.002                                   | 1                                      | ACTN4_10     | 3832693       | 0.071                      | 0.036                                            | 0.036                                   | 1                                      |
| ALB_6        | 2731207       | 0.071                      | 0.033                                            | 0.038                                   | 1                                      | TINAGL1_10   | 2328358       | 0.079                      | 0.049                                            | 0.029                                   | 1                                      |
| TF_16        | 2643273       | 0.072                      | 0.023                                            | 0.049                                   | 1                                      | HBD_3        | 3360426       | 0.079                      | 0.054                                            | 0.025                                   | 1                                      |
| ACTA2_6      | 3299521       | 0.072                      | 0.049                                            | 0.023                                   | 1                                      | KIAA1429_16  | 3145048       | 0.081                      | 0.057                                            | 0.024                                   | 1                                      |
| HSPB1_4      | 3009407       | 0.073                      | 0.027                                            | 0.047                                   | 1                                      | ANXA1_9      | 3174850       | 0.086                      | 0.084                                            | 0.002                                   | 1                                      |
| ANXA1_9      | 3174850       | 0.076                      | 0.063                                            | 0.013                                   | 1                                      | VIM_6        | 3236977       | 0.086                      | 0.062                                            | 0.025                                   | 1                                      |
| ACTN4_9      | 3832690       | 0.077                      | 0.053                                            | 0.023                                   | 1                                      | LDHA_2       | 3322803       | 0.089                      | 0.084                                            | 0.004                                   | 1                                      |
| ACTN4_13     | 3832702       | 0.077                      | 0.029                                            | 0.048                                   | 1                                      | TINAGL1_12   | 2328362       | 0.091                      | 0.061                                            | 0.031                                   | 1                                      |
| TF_20        | 2643279       | 0.078                      | 0.070                                            | 0.008                                   | 1                                      | ALB_7        | 2731209       | 0.093                      | 0.073                                            | 0.019                                   | 1                                      |
| FBLIM1_8     | 2322061       | 0.078                      | 0.070                                            | 0.008                                   | 1                                      | TPM2_8       | 3204734       | 0.093                      | 0.074                                            | 0.019                                   | 1                                      |
| VIM_9        | 3236988       | 0.078                      | 0.077                                            | 0.002                                   | 1                                      | GSN_17       | 3187758       | 0.094                      | 0.069                                            | 0.025                                   | 1                                      |
| MFAP4_4      | 3748803       | 0.079                      | 0.052                                            | 0.027                                   | 1                                      | ACTN1_12     | 3569841       | 0.096                      | 0.053                                            | 0.043                                   | 1                                      |
| PDLIM3_6     | 2796967       | 0.081                      | 0.036                                            | 0.045                                   | 1                                      | VIM_10       | 3236991       | 0.098                      | 0.070                                            | 0.028                                   | 1                                      |
| TINAGL1_9    | 2328356       | 0.081                      | 0.054                                            | 0.027                                   | 1                                      | TINAGL1_9    | 2328356       | 0.100                      | 0.064                                            | 0.036                                   | 1                                      |
| TGM2_1       | 3905146       | 0.083                      | 0.058                                            | 0.025                                   | 1                                      | ACTA2_9      | 3299534       | 0.104                      | 0.050                                            | 0.054                                   | 1                                      |
| ACTN1_3      | 3569821       | 0.085                      | 0.031                                            | 0.054                                   | 1                                      | TINAGL1_11   | 2328360       | 0.109                      | 0.029                                            | 0.079                                   | 1                                      |
| KIAA1429_9   | 3145035       | 0.086                      | 0.049                                            | 0.037                                   | 1                                      | GSN_15       | 3187753       | 0.119                      | 0.044                                            | 0.075                                   | 1                                      |
| OGN_1        | 3214802       | 0.087                      | 0.050                                            | 0.037                                   | 1                                      | FBLIM1_7     | 2322060       | 0.126                      | 0.065                                            | 0.061                                   | 1                                      |
| MFAP4_5      | 3748804       | 0.087                      | 0.048                                            | 0.039                                   | 1                                      | FBLIM1_8     | 2322061       | 0.128                      | 0.053                                            | 0.075                                   | 1                                      |
| TGM2_6       | 3905152       | 0.089                      | 0.037                                            | 0.051                                   | 1                                      | ACTN4_18     | 3832721       | 0.130                      | 0.050                                            | 0.080                                   | 1                                      |
| ACTN1_11     | 3569840       | 0.090                      | 0.074                                            | 0.015                                   | 1                                      | KIAA1429_9   | 3145035       | 0.135                      | 0.054                                            | 0.081                                   | 1                                      |
| ACTN1_13     | 3569842       | 0.091                      | 0.055                                            | 0.036                                   | 1                                      | HBB_5        | 3360413       | 0.143                      | 0.048                                            | 0.095                                   | 1                                      |
| MYL9_3       | 3883929       | 0.095                      | 0.033                                            | 0.062                                   | 1                                      | ANXA5_5      | 2784046       | -0.101                     | 0.105                                            | -0.004                                  | 0                                      |
| TINAGL1_11   | 2328360       | 0.095                      | 0.062                                            | 0.033                                   | 1                                      | ENO1_1       | 2395498       | -0.085                     | 0.089                                            | -0                                      |                                        |

|             |         |        |        |        |   |             |         |        |       |        |   |
|-------------|---------|--------|--------|--------|---|-------------|---------|--------|-------|--------|---|
| ACTN4_20    | 3832723 | 0.111  | 0.031  | 0.080  | 1 | FGG_1       | 2790655 | -0.059 | 0.074 | -0.015 | 0 |
| GSN_17      | 3187758 | 0.112  | 0.044  | 0.068  | 1 | FGG_3       | 2790658 | -0.059 | 0.063 | -0.004 | 0 |
| ACTN1_4     | 3569822 | 0.114  | 0.030  | 0.083  | 1 | APCS_3      | 2362655 | -0.058 | 0.085 | -0.027 | 0 |
| GSN_15      | 3187753 | 0.119  | 0.039  | 0.080  | 1 | ACTN4_5     | 3832685 | -0.058 | 0.058 | 0.000  | 0 |
| OGN_3       | 3214805 | 0.125  | 0.058  | 0.067  | 1 | ALB_11      | 2731218 | -0.057 | 0.073 | -0.016 | 0 |
| FBLIM1_7    | 2322060 | 0.129  | 0.044  | 0.085  | 1 | TGM2_9      | 3905167 | -0.057 | 0.107 | -0.049 | 0 |
| TPM2_1      | 3204722 | -0.072 | -0.072 | 0.085  | 0 | ACTN1_2     | 3569820 | -0.057 | 0.068 | -0.011 | 0 |
| ACTN4_12    | 3832699 | -0.067 | 0.074  | -0.007 | 0 | KIAA1429_24 | 3145057 | -0.056 | 0.069 | -0.013 | 0 |
| FGB_11      | 2748569 | -0.067 | 0.075  | -0.008 | 0 | MYL9_5      | 3883931 | -0.056 | 0.059 | -0.003 | 0 |
| TF_9        | 2643252 | -0.065 | 0.080  | -0.014 | 0 | ACTN1_5     | 3569825 | -0.053 | 0.096 | -0.043 | 0 |
| YWHAB_1     | 3886640 | -0.065 | 0.070  | -0.004 | 0 | ACTA2_3     | 3299513 | -0.053 | 0.076 | -0.023 | 0 |
| KIAA1429_29 | 3145069 | -0.065 | 0.068  | -0.003 | 0 | ANXA4_14    | 2487454 | -0.053 | 0.092 | -0.039 | 0 |
| ACTA2_8     | 3299531 | -0.064 | 0.067  | -0.003 | 0 | FGG_17      | 2790684 | -0.052 | 0.054 | -0.002 | 0 |
| APCS_3      | 2362655 | -0.063 | 0.090  | -0.027 | 0 | PDLIM3_1    | 2796954 | -0.051 | 0.091 | -0.040 | 0 |
| PARK7_5     | 2318755 | -0.062 | 0.068  | -0.007 | 0 | GSN_7       | 3187735 | -0.051 | 0.060 | -0.009 | 0 |
| FBLIM1_2    | 2322044 | -0.061 | 0.070  | -0.009 | 0 | TGM2_16     | 3905184 | -0.049 | 0.095 | -0.046 | 0 |
| VIM_16      | 3237002 | -0.056 | 0.064  | -0.008 | 0 | TINAGL1_7   | 2328353 | -0.046 | 0.061 | -0.015 | 0 |
| VIM_12      | 3236997 | -0.056 | 0.058  | -0.003 | 0 | TINAGL1_2   | 2328344 | -0.045 | 0.103 | -0.059 | 0 |
| TF_21       | 2643280 | -0.054 | 0.057  | -0.003 | 0 | FGB_2       | 2748554 | -0.044 | 0.081 | -0.037 | 0 |
| ALB_8       | 2731211 | -0.053 | 0.066  | -0.012 | 0 | KIAA1429_19 | 3145052 | -0.044 | 0.067 | -0.024 | 0 |
| ACTN4_6     | 3832686 | -0.052 | 0.078  | -0.026 | 0 | TTR_3       | 3783581 | -0.043 | 0.089 | -0.046 | 0 |
| TPM2_12     | 3204741 | -0.052 | 0.071  | -0.019 | 0 | HSPAIL_6    | 2949457 | -0.042 | 0.081 | -0.038 | 0 |
| PDLIM3_13   | 2796987 | -0.051 | 0.060  | -0.009 | 0 | TPM2_9      | 3204737 | -0.042 | 0.095 | -0.054 | 0 |
| ALB_16      | 2731229 | -0.051 | 0.055  | -0.004 | 0 | FGG_2       | 2790657 | -0.041 | 0.102 | -0.061 | 0 |
| TF_19       | 2643277 | -0.050 | 0.062  | -0.013 | 0 | ANXA1_6     | 3174840 | -0.041 | 0.049 | -0.008 | 0 |
| VIM_2       | 3236971 | -0.049 | 0.053  | -0.003 | 0 | TGM2_15     | 3905180 | -0.040 | 0.079 | -0.039 | 0 |
| TF_5        | 2643244 | -0.049 | 0.060  | -0.011 | 0 | TINAGL1_3   | 2328347 | -0.040 | 0.081 | -0.041 | 0 |
| GSN_11      | 3187744 | -0.049 | 0.079  | -0.031 | 0 | ANXA1_5     | 3174838 | -0.039 | 0.104 | -0.065 | 0 |
| CLIC4_1     | 2325626 | -0.049 | 0.055  | -0.006 | 0 | FBLIM1_6    | 2322053 | -0.038 | 0.041 | -0.003 | 0 |
| KIAA1429_13 | 3145042 | -0.048 | 0.057  | -0.009 | 0 | ANXA5_13    | 2784072 | -0.038 | 0.069 | -0.031 | 0 |
| TF_15       | 2643268 | -0.047 | 0.065  | -0.018 | 0 | ACTN4_7     | 3832688 | -0.037 | 0.069 | -0.032 | 0 |
| YWHAZ_3     | 3146954 | -0.047 | 0.070  | -0.023 | 0 | ACTN1_8     | 3569834 | -0.034 | 0.074 | -0.040 | 0 |
| TTR_3       | 3783581 | -0.046 | 0.058  | -0.012 | 0 | PDLIM3_2    | 2796955 | -0.034 | 0.094 | -0.060 | 0 |
| ANXA1_4     | 3174836 | -0.044 | 0.050  | -0.005 | 0 | TAGLN_1     | 3350832 | -0.034 | 0.081 | -0.047 | 0 |
| TAGLN_1     | 3350832 | -0.044 | 0.059  | -0.015 | 0 | ACTN4_19    | 3832722 | -0.034 | 0.049 | -0.015 | 0 |
| ANXA1_1     | 3174831 | -0.044 | 0.052  | -0.008 | 0 | ANXA4_3     | 2487423 | -0.033 | 0.065 | -0.031 | 0 |
| KIAA1429_4  | 3145028 | -0.043 | 0.064  | -0.021 | 0 | FBLIM1_4    | 2322048 | -0.033 | 0.048 | -0.014 | 0 |
| ANXA1_7     | 3174845 | -0.043 | 0.050  | -0.007 | 0 | ANXA4_12    | 2487446 | -0.033 | 0.058 | -0.025 | 0 |
| GSN_1       | 3187708 | -0.043 | 0.058  | -0.015 | 0 | HBB_4       | 3360411 | -0.033 | 0.097 | -0.064 | 0 |
| ACTN1_17    | 3569859 | -0.041 | 0.054  | -0.013 | 0 | OGN_8       | 3214813 | -0.032 | 0.059 | -0.027 | 0 |
| FBLIM1_1    | 2322038 | -0.041 | 0.053  | -0.012 | 0 | TPM2_12     | 3204741 | -0.032 | 0.056 | -0.024 | 0 |
| ACTN1_20    | 3569864 | -0.040 | 0.068  | -0.028 | 0 | TINAGL1_6   | 2328352 | -0.032 | 0.033 | -0.001 | 0 |
| OGN_9       | 3214814 | -0.040 | 0.049  | -0.009 | 0 | PDLIM3_4    | 2796959 | -0.031 | 0.035 | -0.003 | 0 |
| KIAA1429_30 | 3145071 | -0.040 | 0.066  | -0.026 | 0 | ACTN1_3     | 3569821 | -0.031 | 0.033 | -0.002 | 0 |
| TPM2_6      | 3204730 | -0.040 | 0.079  | -0.040 | 0 | ACTN1_7     | 3569832 | -0.031 | 0.040 | -0.010 | 0 |
| APCS_6      | 2362658 | -0.039 | 0.070  | -0.031 | 0 | TTR_2       | 3783579 | -0.031 | 0.083 | -0.053 | 0 |
| ACTN1_16    | 3569850 | -0.039 | 0.075  | -0.037 | 0 | TAGLN_2     | 3350833 | -0.030 | 0.075 | -0.045 | 0 |
| TF_6        | 2643248 | -0.039 | 0.049  | -0.010 | 0 | YWHAB_5     | 3886650 | -0.030 | 0.101 | -0.071 | 0 |
| TAGLN_6     | 3350841 | -0.038 | 0.040  | -0.001 | 0 | GSN_4       | 3187722 | -0.029 | 0.089 | -0.059 | 0 |
| TAGLN_3     | 3350837 | -0.038 | 0.078  | -0.040 | 0 | TF_11       | 2643257 | -0.029 | 0.105 | -0.075 | 0 |
| KIAA1429_20 | 3145053 | -0.038 | 0.054  | -0.016 | 0 | ALB_13      | 2731223 | -0.029 | 0.047 | -0.018 | 0 |
| TGM2_5      | 3905151 | -0.038 | 0.058  | -0.020 | 0 | ALB_8       | 2731211 | -0.029 | 0.069 | -0.041 | 0 |
| ANXA4_3     | 2487423 | -0.037 | 0.053  | -0.015 | 0 | PARK7_4     | 2318754 | -0.029 | 0.069 | -0.040 | 0 |
| VIM_7       | 3236980 | -0.037 | 0.051  | -0.014 | 0 | VIM_2       | 3236971 | -0.029 | 0.043 | -0.014 | 0 |
| ANXA4_11    | 2487443 | -0.037 | 0.051  | -0.014 | 0 | TGM2_13     | 3905177 | -0.027 | 0.066 | -0.039 | 0 |
| MFAP4_1     | 3748799 | -0.036 | 0.047  | -0.011 | 0 | ANXA5_1     | 2784037 | -0.027 | 0.072 | -0.045 | 0 |
| FGB_6       | 2748564 | -0.035 | 0.071  | -0.036 | 0 | CLIC4_1     | 2325626 | -0.026 | 0.092 | -0.065 | 0 |
| FGG_6       | 2790663 | -0.035 | 0.050  | -0.016 | 0 | ACTN1_16    | 3569850 | -0.026 | 0.105 | -0.079 | 0 |
| YWHAZ_2     | 3146941 | -0.034 | 0.052  | -0.017 | 0 | MFAP4_8     | 3748807 | -0.026 | 0.058 | -0.032 | 0 |
| HSPAIL_2    | 2949452 | -0.034 | 0.059  | -0.025 | 0 | FGB_8       | 2748566 | -0.026 | 0.044 | -0.019 | 0 |
| VIM_1       | 3236968 | -0.034 | 0.066  | -0.032 | 0 | FGG_14      | 2790679 | -0.025 | 0.064 | -0.039 | 0 |
| ALB_3       | 2731198 | -0.034 | 0.064  | -0.030 | 0 | GSN_1       | 3187708 | -0.025 | 0.108 | -0.082 | 0 |
| ACTN4_4     | 3832684 | -0.034 | 0.038  | -0.004 | 0 | PDLIM3_10   | 2796976 | -0.025 | 0.055 | -0.030 | 0 |
| LGALS1_2    | 3944893 | -0.033 | 0.068  | -0.035 | 0 | OGN_7       | 3214810 | -0.025 | 0.074 | -0.049 | 0 |
| VIM_5       | 3236975 | -0.033 | 0.073  | -0.040 | 0 | ALB_10      | 2731214 | -0.025 | 0.072 | -0.047 | 0 |
| FGG_1       | 2790655 | -0.032 | 0.097  | -0.065 | 0 | TF_15       | 2643268 | -0.024 | 0.034 | -0.010 | 0 |
| KIAA1429_21 | 3145054 | -0.032 | 0.065  | -0.033 | 0 | KIAA1429_21 | 3145054 | -0.024 | 0.055 | -0.031 | 0 |
| FGG_7       | 2790664 | -0.032 | 0.065  | -0.033 | 0 | TAGLN_10    | 3350845 | -0.022 | 0.061 | -0.039 | 0 |
| ANXA4_1     | 2487413 | -0.031 | 0.054  | -0.023 | 0 | GSN_13      | 3187747 | -0.021 | 0.047 | -0.026 | 0 |
| CLIC4_2     | 2325627 | -0.030 | 0.070  | -0.040 | 0 | ACTN4_2     | 3832645 | -0.021 | 0.038 | -0.018 | 0 |
| TINAGL1_1   | 2328342 | -0.030 | 0.036  | -0.005 | 0 | KIAA1429_25 | 3145058 | -0.020 | 0.060 | -0.039 | 0 |
| KIAA1429_12 | 3145040 | -0.029 | 0.069  | -0.040 | 0 | PDLIM3_9    | 2796971 | -0.020 | 0.033 | -0.013 | 0 |
| TINAGL1_7   | 2328353 | -0.028 | 0.057  | -0.029 | 0 | ACTA2_6     | 3299521 | -0.020 | 0.083 | -0.063 | 0 |
| FGG_14      | 2790679 | -0.027 | 0.040  | -0.013 | 0 | OGN_11      | 3214816 | -0.018 | 0.066 | -0.048 | 0 |
| ENO1_3      | 2395503 | -0.027 | 0.087  | -0.060 | 0 | ANXA5_11    | 2784066 | -0.018 | 0.028 | -0.010 | 0 |
| VIM_3       | 3236972 | -0.026 | 0.029  | -0.003 | 0 | ANXA4_11    | 2487443 | -0.018 | 0.058 | -0.040 | 0 |
| ACTN1_7     | 3569832 | -0.026 | 0.078  | -0.053 | 0 | ACTN4_15    | 3832708 | -0.017 | 0.070 | -0.053 | 0 |
| VIM_17      | 3237003 | -0.026 | 0.049  | -0.023 | 0 | APCS_5      | 2362657 | -0.017 | 0.090 | -0.073 | 0 |
| FBLIM1_4    | 2322048 | -0.025 | 0.067  | -0.042 | 0 | GSN_5       | 3187729 | -0.017 | 0.046 | -0.029 | 0 |
| ANXA4_2     | 2487420 | -0.025 | 0.079  | -0.055 | 0 | ANXA1_2     | 3174832 | -0.016 | 0.046 | -0.030 | 0 |
| KIAA1429_17 | 3145050 | -0.024 | 0.048  | -0.023 | 0 | VIM_5       | 3236975 | -0.016 | 0.030 | -0.014 | 0 |
| ALB_10      | 2731214 | -0.024 | 0.044  | -0.019 | 0 | TF_14       | 2643267 | -0.016 | 0.045 | -0.029 | 0 |
| ALB_4       | 2731201 | -0.024 | 0.064  | -0.040 | 0 | VIM_11      | 3236993 | -0.016 | 0.085 | -0.069 | 0 |
| ALB_2       | 2731195 | -0.024 | 0.079  | -0.055 | 0 | YWHAZ_1     | 3146904 | -0.015 | 0.030 | -0.015 | 0 |
| TF_7        | 2643249 | -0.023 | 0.034  | -0.011 | 0 | GSN_9       | 3187741 | -0.015 | 0.064 | -0.049 | 0 |
| TPM2_10     | 3204738 | -0.023 | 0.042  | -0.018 | 0 | ANXA1_11    | 3174857 | -0.014 | 0.048 | -0.034 | 0 |
| ACTA2_7     | 3299527 | -0.023 | 0.061  | -0.038 | 0 | HSPB1_4     | 3009407 | -0.014 | 0.026 | -0.012 | 0 |
| OGN_6       | 3214809 | -0.022 | 0.055  | -0.032 | 0 | ACTN1_6     | 3569830 | -0.013 | 0.066 | -0.053 | 0 |
| HSPAIL_6    | 2949457 | -0.022 | 0.049  | -0.027 | 0 | VIM_14      | 3237000 | -0.013 | 0.031 | -0.018 | 0 |
| ACTN1_10    | 3569836 | -0.022 | 0.069  | -0.047 | 0 | YWHAQ_4     | 2539900 | -0.013 | 0.091 | -0.078 | 0 |
| ANXA5_8     | 2784050 | -0.021 | 0.058  | -0.037 | 0 | KIAA1429_27 | 3145066 | -0.012 | 0.061 | -0.049 | 0 |
| TF_2        | 2643240 | -0.021 | 0.065  | -0.044 | 0 | ANXA1_3     | 3174835 | -0.011 | 0.077 | -0.066 | 0 |
| YWHAB_4     | 3886649 | -0.021 | 0.029  | -0.008 | 0 | ACTA2_7     | 3299527 | -0.011 | 0.050 | -0.039 | 0 |
| ANXA5_5     | 2784046 | -0.021 | 0.089  | -0.069 | 0 | TGM2_1      | 3905146 | -0.010 | 0.056 | -0.045 | 0 |
| OGN_2       | 3214804 | -0.020 | 0.040  | -0.020 | 0 | KIAA1429_23 | 3145056 | -0.010 | 0.070 | -0.060 | 0 |
| MFAP4_9     | 3748809 | -0.019 | 0.037  | -0.017 | 0 | TAGLN_6     | 3350841 | -0.010 | 0.090 | -0.080 | 0 |
| GSN_4       | 3187722 | -0.018 | 0.079  | -0.060 | 0 | GSN_6       | 3187731 | -0.010 | 0.039 | -0.029 | 0 |
| TAGLN_2     | 3350833 | -0.018 | 0.064  | -0.045 | 0 | ACTN4_13    | 3832702 | -0.010 | 0.061 | -0.051 | 0 |
| TINAGL1_5   | 2328351 | -0.018 | 0.054  | -0.036 | 0 | TF_2        | 2643240 | -0.010 | 0.082 | -0.073 | 0 |
| TGM2_9      | 3905167 | -0.018 | 0.075  | -0.057 | 0 | YWHAQ_2     | 2539883 | -0.009 | 0.079 | -0.070 | 0 |
| ANXA4_8     | 2487434 | -0.017 | 0.057  | -0.040 | 0 | TAGLN_11    | 3350846 | -0.009 | 0.106 | -0.096 | 0 |
| ALB_14      | 2731225 | -0.017 | 0.051  | -0.034 | 0 | TF_19       | 2643277 | -0.009 | 0.106 | -0.097 | 0 |
| FGB_10      | 2748568 |        |        |        |   |             |         |        |       |        |   |



|             |         |        |       |        |   |             |         |        |       |        |   |
|-------------|---------|--------|-------|--------|---|-------------|---------|--------|-------|--------|---|
| TF_11       | 2643257 | -0.013 | 0.059 | -0.047 | 0 | FGG_10      | 2790672 | -0.003 | 0.074 | -0.072 | 0 |
| ANXA5_6     | 2784047 | -0.012 | 0.061 | -0.049 | 0 | ACTN1_14    | 3569846 | -0.002 | 0.064 | -0.062 | 0 |
| FGG_15      | 2790681 | -0.012 | 0.093 | -0.081 | 0 | HBB_2       | 3360404 | -0.002 | 0.054 | -0.052 | 0 |
| FGB_5       | 2748562 | -0.012 | 0.068 | -0.056 | 0 | PDLIM3_3    | 2796957 | -0.002 | 0.051 | -0.048 | 0 |
| LGALS1_3    | 3944897 | -0.012 | 0.075 | -0.063 | 0 | FGB_10      | 2748568 | -0.002 | 0.059 | -0.056 | 0 |
| ANXA5_12    | 2784068 | -0.012 | 0.033 | -0.021 | 0 | MYL9_2      | 3883926 | -0.002 | 0.038 | -0.036 | 0 |
| TAGLN_9     | 3350844 | -0.012 | 0.047 | -0.035 | 0 | ALB_9       | 2731212 | -0.001 | 0.098 | -0.097 | 0 |
| ACTN4_17    | 3832720 | -0.011 | 0.040 | -0.029 | 0 | HSPA1L_1    | 2949451 | -0.001 | 0.048 | -0.047 | 0 |
| FGG_17      | 2790684 | -0.011 | 0.102 | -0.092 | 0 | TGM2_11     | 3905173 | -0.001 | 0.086 | -0.086 | 0 |
| ANXA4_6     | 2487429 | -0.010 | 0.062 | -0.052 | 0 | GSN_14      | 3187751 | 0.000  | 0.054 | -0.054 | 0 |
| PARK7_3     | 2318751 | -0.010 | 0.073 | -0.063 | 0 | TPM2_11     | 3204739 | 0.000  | 0.079 | -0.079 | 0 |
| TPM2_7      | 3204732 | -0.010 | 0.072 | -0.062 | 0 | TGM2_14     | 3905179 | 0.000  | 0.052 | -0.052 | 0 |
| ENO1_1      | 2395498 | -0.010 | 0.064 | -0.054 | 0 | ALB_12      | 2731220 | 0.000  | 0.060 | -0.060 | 0 |
| ALB_11      | 2731218 | -0.010 | 0.068 | -0.058 | 0 | TF_4        | 2643243 | 0.000  | 0.059 | -0.058 | 0 |
| KIAA1429_25 | 3145058 | -0.009 | 0.073 | -0.063 | 0 | TF_9        | 2643252 | 0.000  | 0.084 | -0.083 | 0 |
| ALB_13      | 2731223 | -0.009 | 0.072 | -0.063 | 0 | TAGLN_8     | 3350843 | 0.001  | 0.053 | -0.052 | 0 |
| ACTN1_14    | 3569846 | -0.009 | 0.064 | -0.055 | 0 | GSN_10      | 3187742 | 0.001  | 0.073 | -0.072 | 0 |
| ALB_9       | 2731212 | -0.009 | 0.078 | -0.069 | 0 | PARK7_1     | 2318743 | 0.001  | 0.076 | -0.075 | 0 |
| TAGLN_8     | 3350843 | -0.008 | 0.077 | -0.069 | 0 | ANXA1_4     | 3174836 | 0.001  | 0.078 | -0.077 | 0 |
| VIM_11      | 3236993 | -0.007 | 0.095 | -0.088 | 0 | ENO1_6      | 2395510 | 0.001  | 0.055 | -0.054 | 0 |
| ANXA5_7     | 2784049 | -0.007 | 0.054 | -0.047 | 0 | ACTN4_20    | 3832723 | 0.002  | 0.048 | -0.047 | 0 |
| TF_13       | 2643265 | -0.007 | 0.079 | -0.072 | 0 | MFAP4_7     | 3748806 | 0.002  | 0.045 | -0.044 | 0 |
| LGALS1_1    | 3944888 | -0.006 | 0.076 | -0.070 | 0 | KIAA1429_7  | 3145033 | 0.002  | 0.068 | -0.067 | 0 |
| FGG_16      | 2790683 | -0.006 | 0.071 | -0.065 | 0 | ENO1_4      | 2395504 | 0.002  | 0.074 | -0.072 | 0 |
| TGM2_13     | 3905177 | -0.006 | 0.053 | -0.047 | 0 | KIAA1429_4  | 3145028 | 0.003  | 0.104 | -0.101 | 0 |
| FGB_7       | 2748565 | -0.006 | 0.059 | -0.053 | 0 | FGB_4       | 2748560 | 0.003  | 0.047 | -0.045 | 0 |
| FGG_10      | 2790672 | -0.006 | 0.048 | -0.042 | 0 | TGM2_4      | 3905150 | 0.003  | 0.036 | -0.033 | 0 |
| MYL9_2      | 3883926 | -0.006 | 0.096 | -0.090 | 0 | ANXA5_6     | 2784047 | 0.003  | 0.057 | -0.054 | 0 |
| KIAA1429_11 | 3145039 | -0.006 | 0.067 | -0.061 | 0 | FGG_12      | 2790677 | 0.006  | 0.088 | -0.083 | 0 |
| KIAA1429_1  | 3145023 | -0.005 | 0.088 | -0.083 | 0 | VIM_1       | 3236968 | 0.006  | 0.099 | -0.093 | 0 |
| MYL6_1      | 3417469 | -0.005 | 0.034 | -0.029 | 0 | TAGLN_4     | 3350838 | 0.006  | 0.037 | -0.031 | 0 |
| HSPA1L_5    | 2949456 | -0.005 | 0.073 | -0.068 | 0 | HSPA1L_5    | 2949456 | 0.006  | 0.067 | -0.061 | 0 |
| TINAGL1_14  | 2328364 | -0.004 | 0.077 | -0.073 | 0 | MFAP4_9     | 3748809 | 0.007  | 0.028 | -0.021 | 0 |
| ACTN4_18    | 3832721 | -0.004 | 0.048 | -0.044 | 0 | KIAA1429_3  | 3145026 | 0.007  | 0.081 | -0.074 | 0 |
| YWHAB_9     | 3886657 | -0.004 | 0.058 | -0.054 | 0 | APCS_4      | 2362656 | 0.007  | 0.074 | -0.067 | 0 |
| TF_17       | 2643274 | -0.004 | 0.037 | -0.034 | 0 | ANXA5_3     | 2784039 | 0.007  | 0.030 | -0.023 | 0 |
| TAGLN_10    | 3350845 | -0.002 | 0.097 | -0.095 | 0 | YWHAB_6     | 3886652 | 0.007  | 0.109 | -0.101 | 0 |
| KIAA1429_16 | 3145048 | -0.002 | 0.050 | -0.049 | 0 | ACTN4_3     | 3832683 | 0.007  | 0.048 | -0.040 | 0 |
| ANXA1_5     | 3174838 | -0.001 | 0.077 | -0.075 | 0 | OGN_3       | 3214805 | 0.008  | 0.063 | -0.055 | 0 |
| TF_8        | 2643251 | -0.001 | 0.070 | -0.068 | 0 | ACTN4_9     | 3832690 | 0.008  | 0.061 | -0.053 | 0 |
| YWHAQ_2     | 2539883 | -0.001 | 0.048 | -0.047 | 0 | FGG_9       | 2790670 | 0.009  | 0.047 | -0.039 | 0 |
| FGG_4       | 2790659 | -0.001 | 0.064 | -0.064 | 0 | ACTN1_4     | 3569822 | 0.009  | 0.054 | -0.045 | 0 |
| HSPB1_1     | 3009402 | 0.000  | 0.066 | -0.065 | 0 | FGG_15      | 2790681 | 0.009  | 0.077 | -0.068 | 0 |
| ALB_12      | 2731220 | 0.000  | 0.050 | -0.050 | 0 | TPM2_7      | 3204732 | 0.009  | 0.076 | -0.067 | 0 |
| PARK7_1     | 2318743 | 0.000  | 0.085 | -0.085 | 0 | ACTA2_8     | 3299531 | 0.010  | 0.055 | -0.045 | 0 |
| FBLIM1_6    | 2322053 | 0.000  | 0.045 | -0.045 | 0 | HSPA1L_3    | 2949453 | 0.010  | 0.040 | -0.030 | 0 |
| ACTN1_6     | 3569830 | 0.000  | 0.072 | -0.072 | 0 | ANXA5_10    | 2784065 | 0.010  | 0.061 | -0.051 | 0 |
| ACTN1_5     | 3569825 | 0.001  | 0.077 | -0.076 | 0 | ALB_3       | 2731198 | 0.011  | 0.045 | -0.034 | 0 |
| ENO1_5      | 2395505 | 0.002  | 0.074 | -0.072 | 0 | YWHAB_10    | 3886658 | 0.011  | 0.042 | -0.032 | 0 |
| OGN_7       | 3214810 | 0.002  | 0.047 | -0.045 | 0 | ANXA4_10    | 2487441 | 0.011  | 0.022 | -0.011 | 0 |
| APCS_4      | 2362656 | 0.002  | 0.078 | -0.076 | 0 | OGN_6       | 3214809 | 0.011  | 0.058 | -0.046 | 0 |
| KIAA1429_19 | 3145052 | 0.002  | 0.034 | -0.032 | 0 | TTR_4       | 3783587 | 0.011  | 0.084 | -0.073 | 0 |
| TF_18       | 2643275 | 0.002  | 0.063 | -0.061 | 0 | TGM2_5      | 3905151 | 0.012  | 0.058 | -0.046 | 0 |
| TGM2_12     | 3905175 | 0.003  | 0.056 | -0.053 | 0 | ACTN4_8     | 3832689 | 0.012  | 0.058 | -0.046 | 0 |
| TINAGL1_8   | 2328355 | 0.003  | 0.089 | -0.086 | 0 | ENO1_3      | 2395503 | 0.013  | 0.078 | -0.066 | 0 |
| PDLIM3_5    | 2796962 | 0.003  | 0.078 | -0.074 | 0 | PDLIM3_7    | 2796968 | 0.013  | 0.064 | -0.051 | 0 |
| MYL9_4      | 3883930 | 0.003  | 0.037 | -0.034 | 0 | TGM2_12     | 3905175 | 0.013  | 0.063 | -0.049 | 0 |
| ACTN4_15    | 3832708 | 0.003  | 0.064 | -0.060 | 0 | TPM2_2      | 3204723 | 0.014  | 0.051 | -0.037 | 0 |
| ACTN4_3     | 3832683 | 0.005  | 0.076 | -0.071 | 0 | ALB_6       | 2731207 | 0.014  | 0.089 | -0.075 | 0 |
| PDLIM3_4    | 2796959 | 0.006  | 0.073 | -0.067 | 0 | TF_6        | 2643248 | 0.014  | 0.080 | -0.066 | 0 |
| GSN_9       | 3187741 | 0.006  | 0.092 | -0.086 | 0 | TTR_5       | 3783588 | 0.015  | 0.059 | -0.045 | 0 |
| TINAGL1_6   | 2328352 | 0.006  | 0.051 | -0.045 | 0 | ACTA2_2     | 3299508 | 0.015  | 0.042 | -0.027 | 0 |
| ANXA1_2     | 3174832 | 0.007  | 0.040 | -0.033 | 0 | ALB_15      | 2731228 | 0.015  | 0.071 | -0.056 | 0 |
| ANXA4_13    | 2487453 | 0.007  | 0.051 | -0.044 | 0 | ACTN4_17    | 3832720 | 0.016  | 0.065 | -0.049 | 0 |
| ANXA1_3     | 3174835 | 0.007  | 0.064 | -0.057 | 0 | ANXA1_8     | 3174847 | 0.017  | 0.042 | -0.025 | 0 |
| ANXA1_6     | 3174840 | 0.008  | 0.041 | -0.033 | 0 | ANXA4_13    | 2487453 | 0.017  | 0.072 | -0.055 | 0 |
| GSN_18      | 3187761 | 0.008  | 0.070 | -0.062 | 0 | ACTN1_17    | 3569859 | 0.017  | 0.111 | -0.094 | 0 |
| PDLIM3_8    | 2796969 | 0.008  | 0.058 | -0.049 | 0 | HBD_1       | 3360419 | 0.018  | 0.074 | -0.056 | 0 |
| ANXA4_5     | 2487428 | 0.008  | 0.075 | -0.067 | 0 | TGM2_8      | 3905165 | 0.019  | 0.064 | -0.045 | 0 |
| FGG_2       | 2790657 | 0.009  | 0.049 | -0.040 | 0 | VIM_3       | 3236972 | 0.019  | 0.058 | -0.039 | 0 |
| TPM2_11     | 3204739 | 0.009  | 0.051 | -0.042 | 0 | KIAA1429_17 | 3145050 | 0.019  | 0.055 | -0.036 | 0 |
| ANXA4_10    | 2487441 | 0.009  | 0.071 | -0.061 | 0 | ANXA5_9     | 2784059 | 0.020  | 0.071 | -0.051 | 0 |
| HSPB1_2     | 3009405 | 0.009  | 0.076 | -0.067 | 0 | TF_16       | 2643273 | 0.020  | 0.064 | -0.045 | 0 |
| FGB_1       | 2748550 | 0.011  | 0.080 | -0.069 | 0 | ACTN4_4     | 3832684 | 0.020  | 0.061 | -0.041 | 0 |
| TPM2_2      | 3204723 | 0.011  | 0.054 | -0.043 | 0 | GSN_18      | 3187761 | 0.020  | 0.055 | -0.035 | 0 |
| ANXA5_9     | 2784059 | 0.011  | 0.035 | -0.024 | 0 | OGN_4       | 3214806 | 0.021  | 0.068 | -0.047 | 0 |
| TGM2_3      | 3905149 | 0.011  | 0.098 | -0.086 | 0 | ANXA5_12    | 2784068 | 0.021  | 0.049 | -0.028 | 0 |
| ANXA5_1     | 2784037 | 0.013  | 0.056 | -0.044 | 0 | ACTN1_15    | 3569849 | 0.021  | 0.059 | -0.038 | 0 |
| ALB_7       | 2731209 | 0.013  | 0.085 | -0.072 | 0 | GSN_19      | 3187764 | 0.022  | 0.068 | -0.046 | 0 |
| FGB_9       | 2748567 | 0.013  | 0.081 | -0.067 | 0 | KIAA1429_12 | 3145040 | 0.022  | 0.063 | -0.041 | 0 |
| ANXA1_10    | 3174853 | 0.014  | 0.076 | -0.062 | 0 | ANXA5_2     | 2784038 | 0.022  | 0.060 | -0.037 | 0 |
| KIAA1429_6  | 3145031 | 0.014  | 0.093 | -0.079 | 0 | ACTN1_1     | 3569819 | 0.023  | 0.048 | -0.025 | 0 |
| FGG_9       | 2790670 | 0.015  | 0.083 | -0.068 | 0 | YWHAB_2     | 3886643 | 0.023  | 0.091 | -0.067 | 0 |
| ALB_1       | 2731194 | 0.016  | 0.091 | -0.075 | 0 | ACTA2_5     | 3299520 | 0.023  | 0.050 | -0.027 | 0 |
| TF_14       | 2643267 | 0.016  | 0.101 | -0.086 | 0 | ANXA4_1     | 2487413 | 0.024  | 0.083 | -0.059 | 0 |
| TINAGL1_3   | 2328347 | 0.016  | 0.059 | -0.044 | 0 | YWHAB_4     | 3886649 | 0.024  | 0.075 | -0.051 | 0 |
| ACTN4_10    | 3832693 | 0.016  | 0.042 | -0.026 | 0 | YWHAB_3     | 3146954 | 0.024  | 0.058 | -0.034 | 0 |
| HBD_4       | 3360427 | 0.016  | 0.043 | -0.027 | 0 | YWHAB_7     | 3886655 | 0.024  | 0.049 | -0.025 | 0 |
| ANXA1_11    | 3174857 | 0.017  | 0.063 | -0.046 | 0 | HSPB1_1     | 3009402 | 0.024  | 0.062 | -0.038 | 0 |
| FGG_12      | 2790677 | 0.017  | 0.070 | -0.053 | 0 | ACTN1_19    | 3569862 | 0.024  | 0.094 | -0.070 | 0 |
| TAGLN_4     | 3350838 | 0.017  | 0.062 | -0.045 | 0 | TAGLN_5     | 3350840 | 0.024  | 0.037 | -0.013 | 0 |
| TF_10       | 2643254 | 0.018  | 0.088 | -0.071 | 0 | GSN_20      | 3187765 | 0.025  | 0.041 | -0.016 | 0 |
| TGM2_10     | 3905168 | 0.018  | 0.071 | -0.054 | 0 | OGN_5       | 3214807 | 0.026  | 0.083 | -0.057 | 0 |
| TPM2_8      | 3204734 | 0.018  | 0.048 | -0.030 | 0 | OGN_12      | 3214817 | 0.026  | 0.057 | -0.030 | 0 |
| APCS_1      | 2362652 | 0.019  | 0.062 | -0.043 | 0 | TGM2_7      | 3905162 | 0.027  | 0.127 | -0.100 | 0 |
| FGB_3       | 2748555 | 0.019  | 0.050 | -0.030 | 0 | ANXA1_7     | 3174845 | 0.027  | 0.058 | -0.031 | 0 |
| ACTN1_8     | 3569834 | 0.020  | 0.067 | -0.047 | 0 | KIAA1429_14 | 3145043 | 0.028  | 0.092 | -0.064 | 0 |
| OGN_12      | 3214817 | 0.020  | 0.090 | -0.071 | 0 | FGG_11      | 2790675 | 0.028  | 0.097 | -0.069 | 0 |
| MFAP4_7     | 3748806 | 0.020  | 0.034 | -0.015 | 0 | TTR_1       | 3783578 | 0.028  | 0.088 | -0.059 | 0 |
| TTR_2       | 3783579 | 0.021  | 0.062 | -0.041 | 0 | TF_7        | 2643249 | 0.029  | 0.050 | -0.021 | 0 |
| ACTA2_1     | 3299507 | 0.022  | 0.056 | -0.034 | 0 | ACTN4_6     | 3832686 | 0.029  | 0.069 | -0.040 | 0 |
| TF_1        | 2643237 | 0.022  | 0.054 | -0.032 | 0 | VIM_13      | 3236999 | 0.030  | 0.069 | -0.040 | 0 |
| KIAA1429_22 | 3145055 |        |       |        |   |             |         |        |       |        |   |

|             |         |       |       |        |   |             |         |       |       |        |   |
|-------------|---------|-------|-------|--------|---|-------------|---------|-------|-------|--------|---|
| ANXA5_3     | 2784039 | 0.026 | 0.045 | -0.019 | 0 | OGN_1       | 3214802 | 0.034 | 0.076 | -0.042 | 0 |
| ALB_15      | 2731228 | 0.026 | 0.053 | -0.027 | 0 | TINAGL1_5   | 2328351 | 0.034 | 0.056 | -0.022 | 0 |
| PDLIM3_3    | 2796957 | 0.027 | 0.059 | -0.031 | 0 | MYL9_4      | 3883930 | 0.035 | 0.091 | -0.056 | 0 |
| FGG_13      | 2790678 | 0.027 | 0.097 | -0.070 | 0 | HSPB1_2     | 3009405 | 0.035 | 0.058 | -0.023 | 0 |
| FGG_3       | 2790658 | 0.028 | 0.067 | -0.039 | 0 | ANXA5_8     | 2784050 | 0.035 | 0.056 | -0.021 | 0 |
| TTR_5       | 3783588 | 0.028 | 0.072 | -0.043 | 0 | LGALS1_1    | 3944888 | 0.035 | 0.083 | -0.048 | 0 |
| VIM_4       | 3236974 | 0.029 | 0.062 | -0.033 | 0 | VIM_7       | 3236980 | 0.035 | 0.109 | -0.074 | 0 |
| PDLIM3_2    | 2796955 | 0.029 | 0.058 | -0.029 | 0 | ANXA1_10    | 3174853 | 0.036 | 0.068 | -0.032 | 0 |
| TGM2_8      | 3905165 | 0.030 | 0.066 | -0.036 | 0 | MFAP4_4     | 3748803 | 0.036 | 0.060 | -0.024 | 0 |
| KIAA1429_14 | 3145043 | 0.030 | 0.071 | -0.041 | 0 | PARK7_3     | 2318751 | 0.036 | 0.056 | -0.020 | 0 |
| ANXA4_9     | 2487439 | 0.030 | 0.046 | -0.016 | 0 | TF_17       | 2643274 | 0.037 | 0.079 | -0.042 | 0 |
| HSPAIL_1    | 2949451 | 0.030 | 0.080 | -0.050 | 0 | KIAA1429_15 | 3145045 | 0.038 | 0.055 | -0.018 | 0 |
| TF_3        | 2643241 | 0.030 | 0.040 | -0.009 | 0 | KIAA1429_31 | 3145076 | 0.038 | 0.062 | -0.024 | 0 |
| ACTN4_8     | 3832689 | 0.031 | 0.039 | -0.008 | 0 | GSN_8       | 3187739 | 0.038 | 0.108 | -0.070 | 0 |
| TINAGL1_4   | 2328349 | 0.032 | 0.084 | -0.052 | 0 | APCS_2      | 2362653 | 0.039 | 0.081 | -0.042 | 0 |
| HBD_1       | 3360419 | 0.032 | 0.059 | -0.027 | 0 | ANXA1_1     | 3174831 | 0.039 | 0.073 | -0.034 | 0 |
| TF_4        | 2643243 | 0.033 | 0.083 | -0.051 | 0 | KIAA1429_6  | 3145031 | 0.039 | 0.053 | -0.013 | 0 |
| ACTA2_2     | 3299508 | 0.033 | 0.079 | -0.047 | 0 | TGM2_3      | 3905149 | 0.039 | 0.043 | -0.003 | 0 |
| PDLIM3_7    | 2796968 | 0.033 | 0.057 | -0.024 | 0 | ALB_2       | 2731195 | 0.039 | 0.088 | -0.048 | 0 |
| APCS_5      | 2362657 | 0.033 | 0.070 | -0.036 | 0 | KIAA1429_2  | 3145024 | 0.040 | 0.042 | -0.002 | 0 |
| KIAA1429_3  | 3145026 | 0.034 | 0.085 | -0.052 | 0 | FGG_16      | 2790683 | 0.040 | 0.065 | -0.026 | 0 |
| KIAA1429_5  | 3145030 | 0.034 | 0.047 | -0.014 | 0 | KIAA1429_30 | 3145071 | 0.040 | 0.077 | -0.037 | 0 |
| GSN_13      | 3187747 | 0.034 | 0.089 | -0.055 | 0 | ACTN1_10    | 3569836 | 0.040 | 0.045 | -0.005 | 0 |
| TTR_1       | 3783578 | 0.034 | 0.069 | -0.035 | 0 | VIM_4       | 3236974 | 0.043 | 0.089 | -0.046 | 0 |
| ACTA2_4     | 3299517 | 0.034 | 0.044 | -0.010 | 0 | GSN_12      | 3187745 | 0.043 | 0.067 | -0.024 | 0 |
| YWHAB_8     | 3886656 | 0.035 | 0.044 | -0.009 | 0 | CLIC4_2     | 2325627 | 0.044 | 0.075 | -0.031 | 0 |
| YWHAZ_1     | 3146904 | 0.036 | 0.060 | -0.024 | 0 | ANXA4_6     | 2487429 | 0.045 | 0.069 | -0.025 | 0 |
| FGB_2       | 2748554 | 0.036 | 0.052 | -0.016 | 0 | KIAA1429_20 | 3145053 | 0.045 | 0.048 | -0.003 | 0 |
| MYL9_5      | 3883931 | 0.037 | 0.040 | -0.003 | 0 | ALB_16      | 2731229 | 0.046 | 0.101 | -0.055 | 0 |
| KIAA1429_2  | 3145024 | 0.037 | 0.063 | -0.025 | 0 | TGM2_10     | 3905168 | 0.046 | 0.087 | -0.041 | 0 |
| ANXA4_12    | 2487446 | 0.037 | 0.058 | -0.020 | 0 | FGB_9       | 2748567 | 0.047 | 0.103 | -0.056 | 0 |
| PARK7_4     | 2318754 | 0.037 | 0.067 | -0.030 | 0 | MYL9_3      | 3883929 | 0.047 | 0.073 | -0.027 | 0 |
| TPM2_5      | 3204729 | 0.038 | 0.047 | -0.009 | 0 | KIAA1429_8  | 3145034 | 0.047 | 0.058 | -0.011 | 0 |
| FGB_8       | 2748566 | 0.038 | 0.058 | -0.020 | 0 | KIAA1429_5  | 3145030 | 0.048 | 0.072 | -0.025 | 0 |
| PARK7_2     | 2318747 | 0.038 | 0.048 | -0.009 | 0 | ANXA5_4     | 2784045 | 0.048 | 0.054 | -0.006 | 0 |
| PDLIM3_1    | 2796954 | 0.038 | 0.054 | -0.016 | 0 | TINAGL1_14  | 2328364 | 0.048 | 0.085 | -0.036 | 0 |
| VIM_6       | 3236977 | 0.038 | 0.070 | -0.032 | 0 | TPM2_3      | 3204727 | 0.049 | 0.075 | -0.027 | 0 |
| TGM2_11     | 3905173 | 0.039 | 0.047 | -0.009 | 0 | KIAA1429_26 | 3145060 | 0.049 | 0.065 | -0.016 | 0 |
| KIAA1429_23 | 3145056 | 0.040 | 0.082 | -0.043 | 0 | FGB_5       | 2748562 | 0.050 | 0.082 | -0.033 | 0 |
| FGB_4       | 2748560 | 0.040 | 0.076 | -0.036 | 0 | FGB_3       | 2748555 | 0.050 | 0.062 | -0.012 | 0 |
| KIAA1429_7  | 3145033 | 0.040 | 0.053 | -0.012 | 0 | TF_13       | 2643265 | 0.050 | 0.077 | -0.027 | 0 |
| ENO1_4      | 2395504 | 0.041 | 0.068 | -0.027 | 0 | TINAGL1_8   | 2328355 | 0.050 | 0.087 | -0.037 | 0 |
| TGM2_2      | 3905147 | 0.041 | 0.066 | -0.025 | 0 | MFAP4_6     | 3748805 | 0.050 | 0.098 | -0.048 | 0 |
| OGN_11      | 3214816 | 0.042 | 0.069 | -0.026 | 0 | TAGLN_9     | 3350844 | 0.050 | 0.107 | -0.057 | 0 |
| VIM_14      | 3237000 | 0.042 | 0.053 | -0.011 | 0 | TF_5        | 2643244 | 0.050 | 0.076 | -0.026 | 0 |
| KIAA1429_24 | 3145057 | 0.043 | 0.066 | -0.024 | 0 | PDLIM3_8    | 2796969 | 0.051 | 0.051 | -0.001 | 0 |
| APCS_2      | 2362653 | 0.043 | 0.051 | -0.007 | 0 | TF_3        | 2643241 | 0.052 | 0.073 | -0.021 | 0 |
| ANXA1_8     | 3174847 | 0.047 | 0.079 | -0.032 | 0 | YWHAB_3     | 2539899 | 0.056 | 0.087 | -0.030 | 0 |
| HSPAIL_4    | 2949455 | 0.047 | 0.075 | -0.028 | 0 | ENO1_5      | 2395505 | 0.057 | 0.061 | -0.004 | 0 |
| KIAA1429_15 | 3145045 | 0.048 | 0.051 | -0.003 | 0 | ANXA5_7     | 2784049 | 0.059 | 0.097 | -0.038 | 0 |
| ENO1_6      | 2395510 | 0.048 | 0.082 | -0.034 | 0 | ACTN1_11    | 3569840 | 0.062 | 0.073 | -0.011 | 0 |
| YWHAB_1     | 2539873 | 0.051 | 0.060 | -0.009 | 0 | PDLIM3_5    | 2796962 | 0.062 | 0.082 | -0.020 | 0 |
| ACTA2_9     | 3299534 | 0.054 | 0.059 | -0.005 | 0 | ACTA2_4     | 3299517 | 0.065 | 0.067 | -0.002 | 0 |
| PDLIM3_9    | 2796971 | 0.056 | 0.056 | -0.001 | 0 | TINAGL1_4   | 2328349 | 0.067 | 0.107 | -0.041 | 0 |
| TPM2_4      | 3204728 | 0.058 | 0.063 | -0.005 | 0 | ALB_4       | 2731201 | 0.068 | 0.085 | -0.017 | 0 |
| KIAA1429_27 | 3145066 | 0.058 | 0.065 | -0.007 | 0 | TGM2_6      | 3905152 | 0.071 | 0.094 | -0.023 | 0 |
| VIM_10      | 3236991 | 0.069 | 0.074 | -0.005 | 0 | LGALS1_2    | 3944893 | 0.074 | 0.092 | -0.018 | 0 |
| ACTN4_19    | 3832722 | 0.072 | 0.077 | -0.005 | 0 | ALB_5       | 2731206 | 0.074 | 0.081 | -0.007 | 0 |
| TGM2_7      | 3905162 | 0.074 | 0.088 | -0.014 | 0 | FGG_5       | 2790662 | 0.075 | 0.094 | -0.019 | 0 |
| TINAGL1_12  | 2328362 | 0.075 | 0.075 | -0.001 | 0 | ACTN1_9     | 3569835 | 0.075 | 0.093 | -0.018 | 0 |
| MFAP4_3     | 3748802 | 0.076 | 0.085 | -0.008 | 0 | YWHAB_9     | 3886657 | 0.075 | 0.090 | -0.015 | 0 |

<sup>a</sup> Loading value from OPLS-DA model with controls vs diluted

<sup>b</sup> Jack-Knife confidence interval derived from cross-validation in OPLS-DA models

<sup>c</sup> Subtracting the jack-knife confidence intervals from the corresponding loading values, if positive indicates significance

<sup>d</sup> If the subtracting jack-knife confidence interval from the corresponding loading is positive (significant), and indicated with 1, and if negative (non-significant), it is indicated with 0

**Supplemental Table 8.** Genes showing correlation with protein expression in TAV and BAV based on multivariate statistics.

| TAV       |                   |                          |                      | Protein expression | Gene expression   | Exon expression   |                             |
|-----------|-------------------|--------------------------|----------------------|--------------------|-------------------|-------------------|-----------------------------|
| Gene name | Meta probe set ID | Protein accession number | No of protein spots* | CvsD <sup>a</sup>  | CvsD <sup>b</sup> | CvsD <sup>c</sup> | Total no of probe sets/gene |
| ACTN1     | 3569814           | P12814                   | 2                    | 0.051              | 0.070             | 12                | 22                          |
| ACTN4     | 3832643           | O43707                   | 5                    | 0.063              | 0.178             | 6                 | 20                          |
| ENO1      | 2395490           | P06733                   | 3                    | 0.025              | 0.122             | 1                 | 6                           |
| HBB       | 3360401           | P68871                   | 7                    | 0.053              | 0.211             | 4                 | 5                           |
| HBD       | 3360417           | P02042                   | 1                    | 0.044              | 0.023             | 2                 | 4                           |
| LDHA      | 3322775           | P00338                   | 1                    | 0.022              | 0.041             | 2                 | 2                           |
| TINAGL1   | 2328320           | Q9GZM7                   | 2                    | 0.032              | 0.055             | 4                 | 15                          |
| TUBB      | 2901913           | P07437                   | 3                    | 0.037              | 0.020             | na                | na                          |
| YWHAB     | 3886639           | P31946                   | 2                    | 0.076              | 0.030             | 5                 | 10                          |
| YWHAQ     | 2539869           | P27348                   | 1                    | 0.050              | 0.038             | 1                 | 4                           |

  

| BAV       |                   |                          |                      | Protein expression | Gene expression   | Exon expression   |                             |
|-----------|-------------------|--------------------------|----------------------|--------------------|-------------------|-------------------|-----------------------------|
| Gene name | Meta probe set ID | Protein accession number | No of protein spots* | CvsD <sup>a</sup>  | CvsD <sup>b</sup> | CvsD <sup>c</sup> | Total no of probe sets/gene |
| ACTN1     | 3569814           | P12814                   | 2                    | 0.049              | 0.096             | 5                 | 22                          |
| ACTN4     | 3832643           | O43707                   | 5                    | 0.086              | 0.163             | 5                 | 20                          |
| FBLIM1    | 2322036           | Q8WUP2                   | 2                    | 0.021              | 0.067             | 4                 | 8                           |
| HBB       | 3360401           | P68871                   | 7                    | 0.057              | 0.253             | 3                 | 5                           |
| HBD       | 3360417           | P02042                   | 1                    | 0.045              | 0.017             | 3                 | 4                           |
| HSPB1     | 3009399           | P04792                   | 2                    | 0.044              | 0.063             | 0                 | 4                           |
| TINAGL1   | 2328320           | Q9GZM7                   | 2                    | 0.031              | 0.028             | 7                 | 15                          |
| TUBB      | 2901913           | P07437                   | 3                    | 0.045              | 0.102             | na                |                             |

<sup>a</sup> ABS (loading)-ABS(jack-knife conf intervall) protein expression data, dilated higher (green), non-dilated higher (blue)

<sup>b</sup> ABS (loading)-ABS(jack-knife conf intervall) meta probe set array expression data

<sup>c</sup> ABS (loading)-ABS(jack-knife conf intervall) probe set array expression data

na not analyzed due to not present at core level or only one exon

\* Number of protein spots identified on the gel

Supplemental Figure 1

**A**

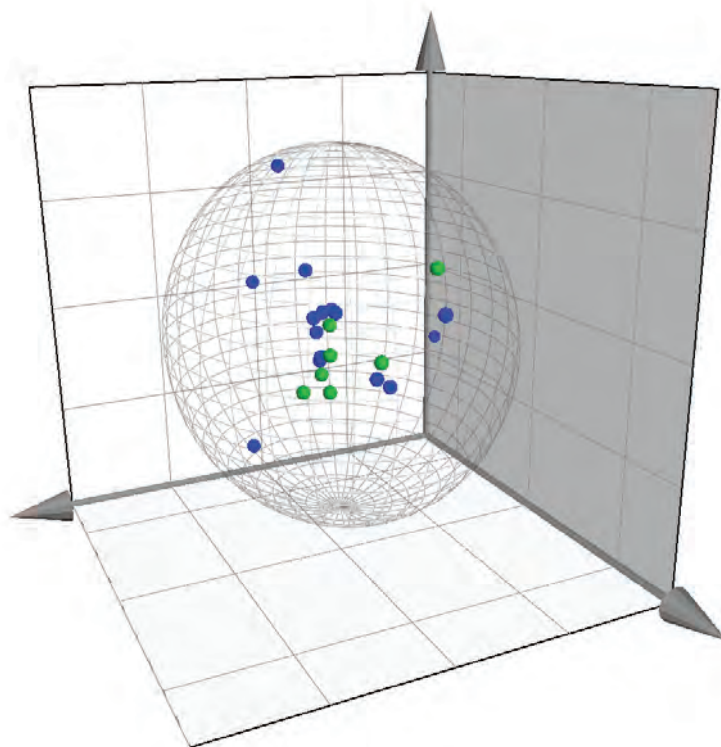

**B**

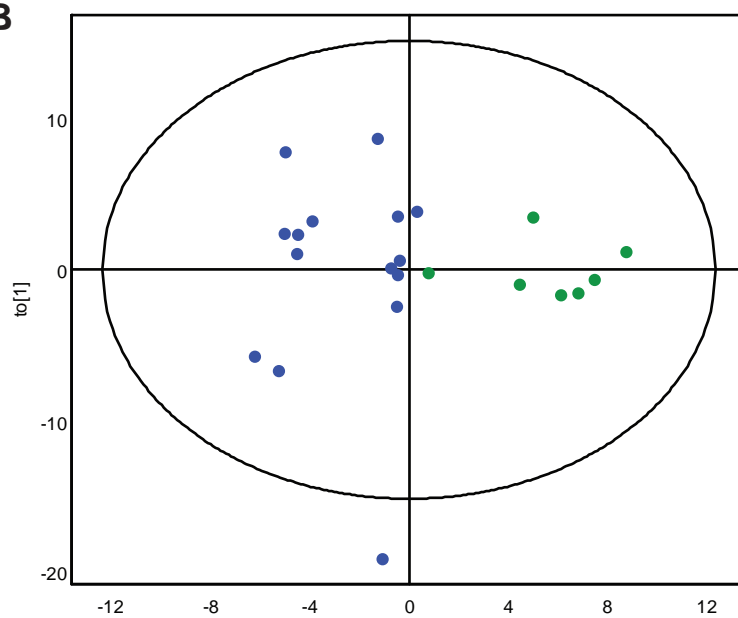

**C**

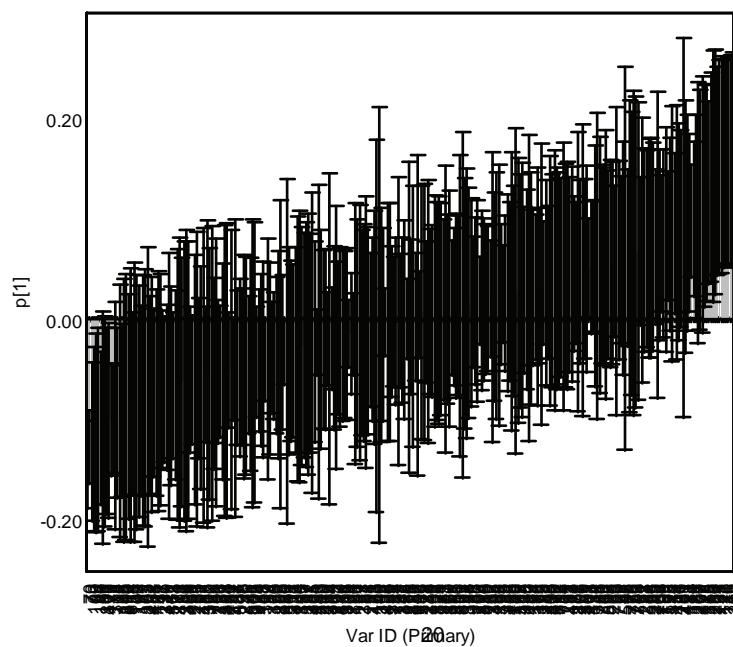

Supplemental Figure 2

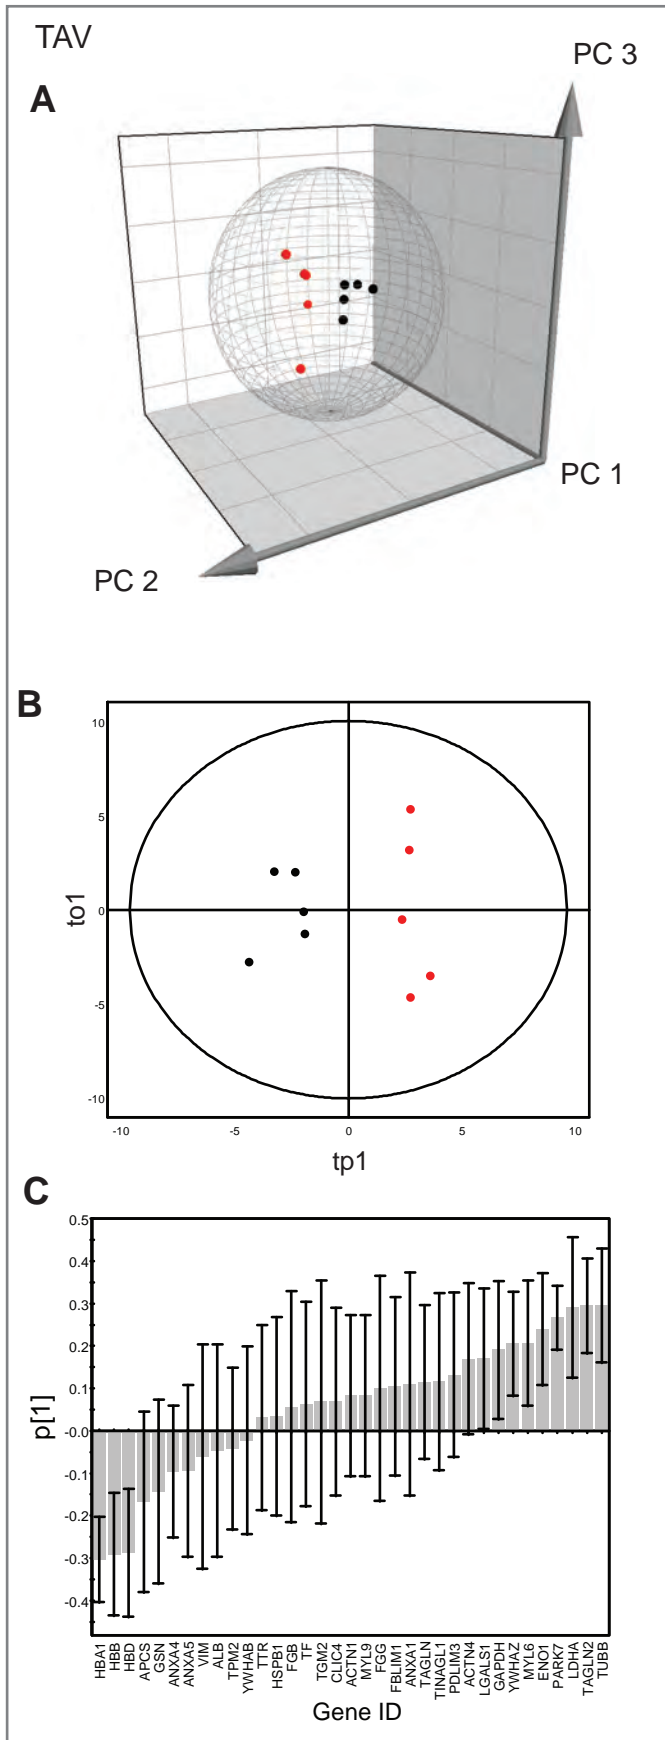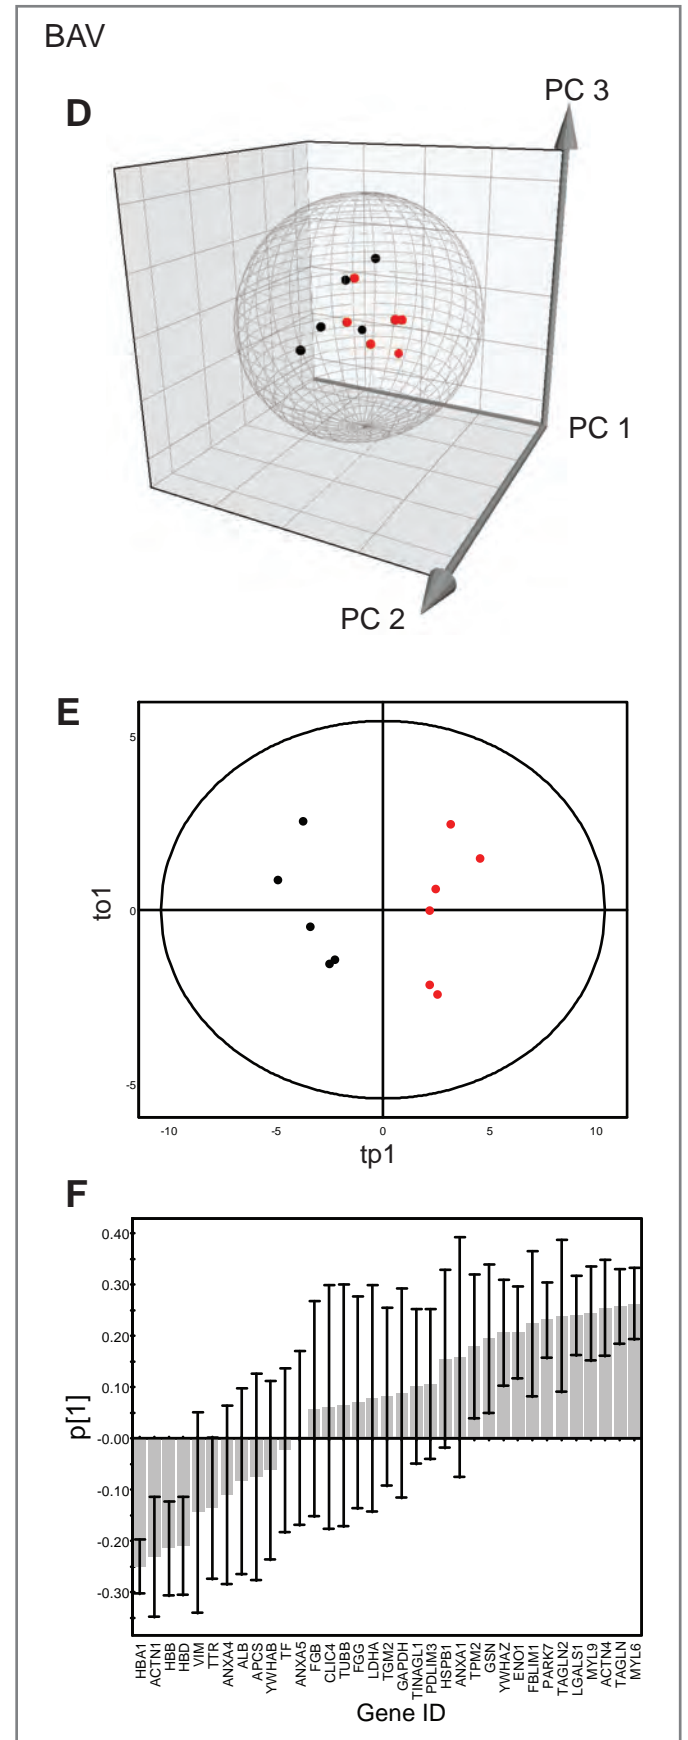

### Supplemental Figure 3

# A

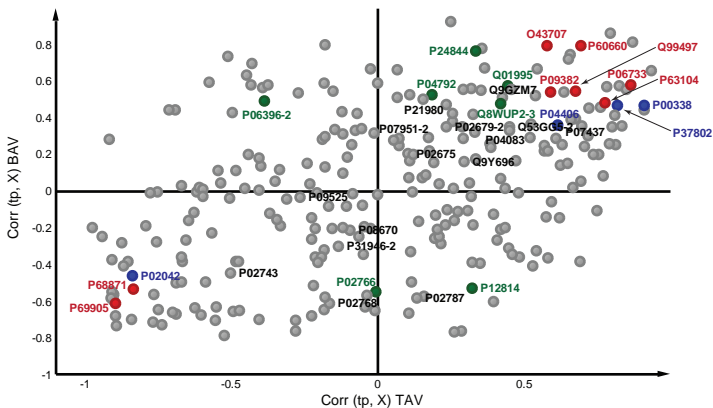

# B

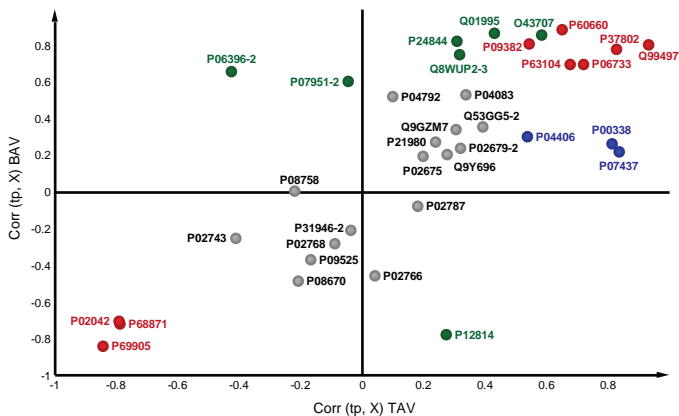

Supplemental Figure 4

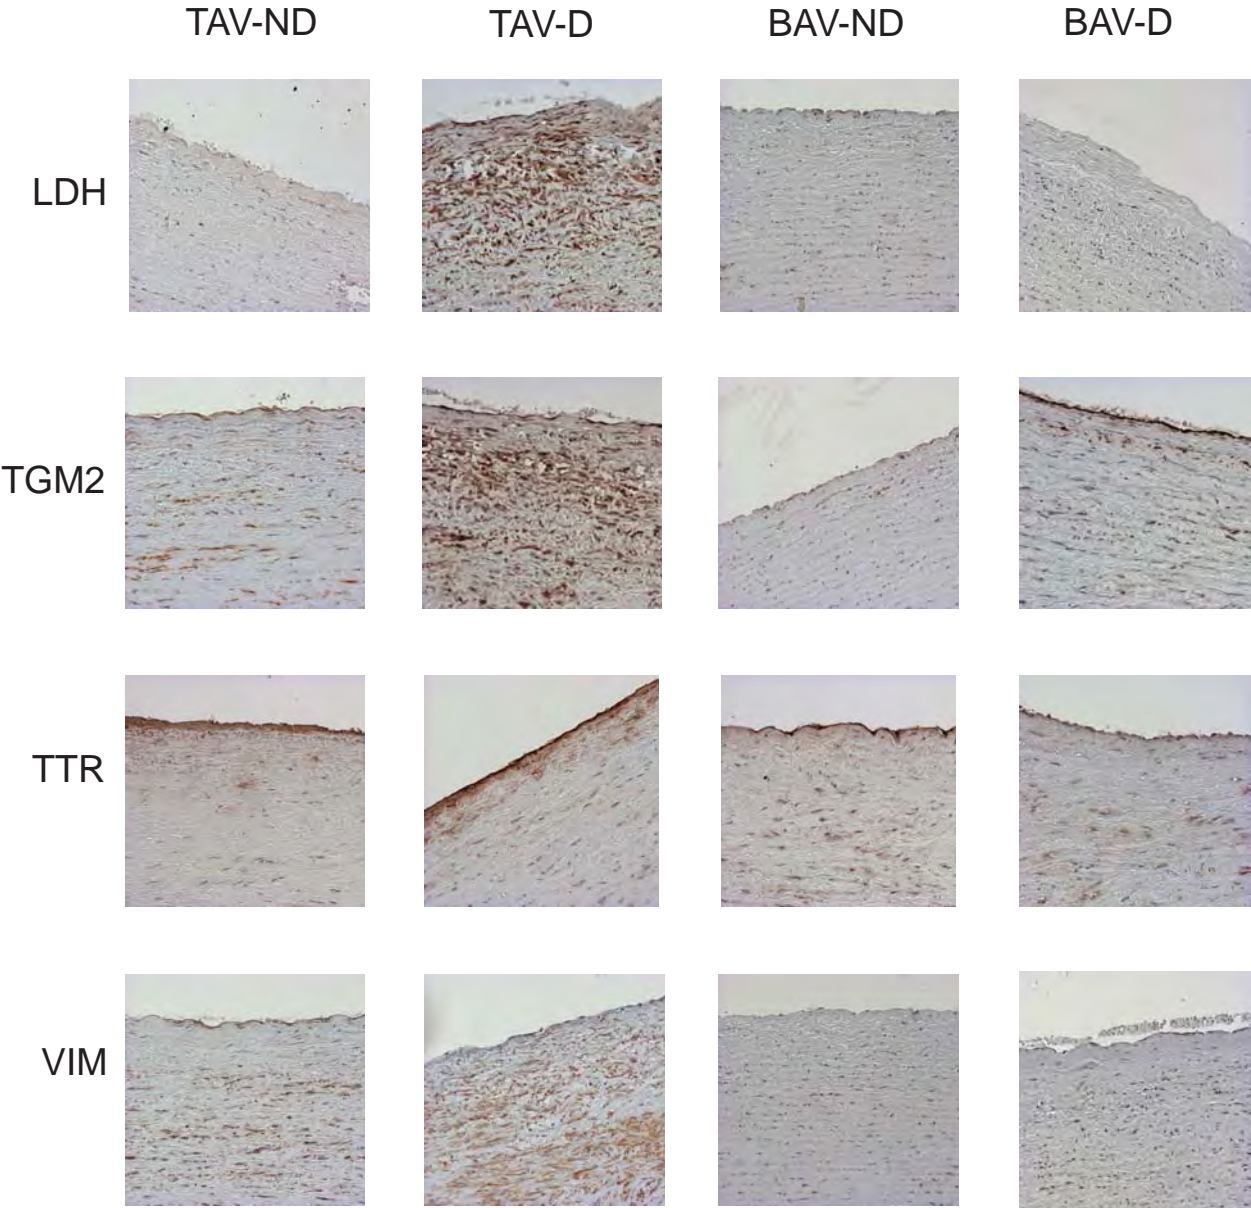





Supplemental Figure 6

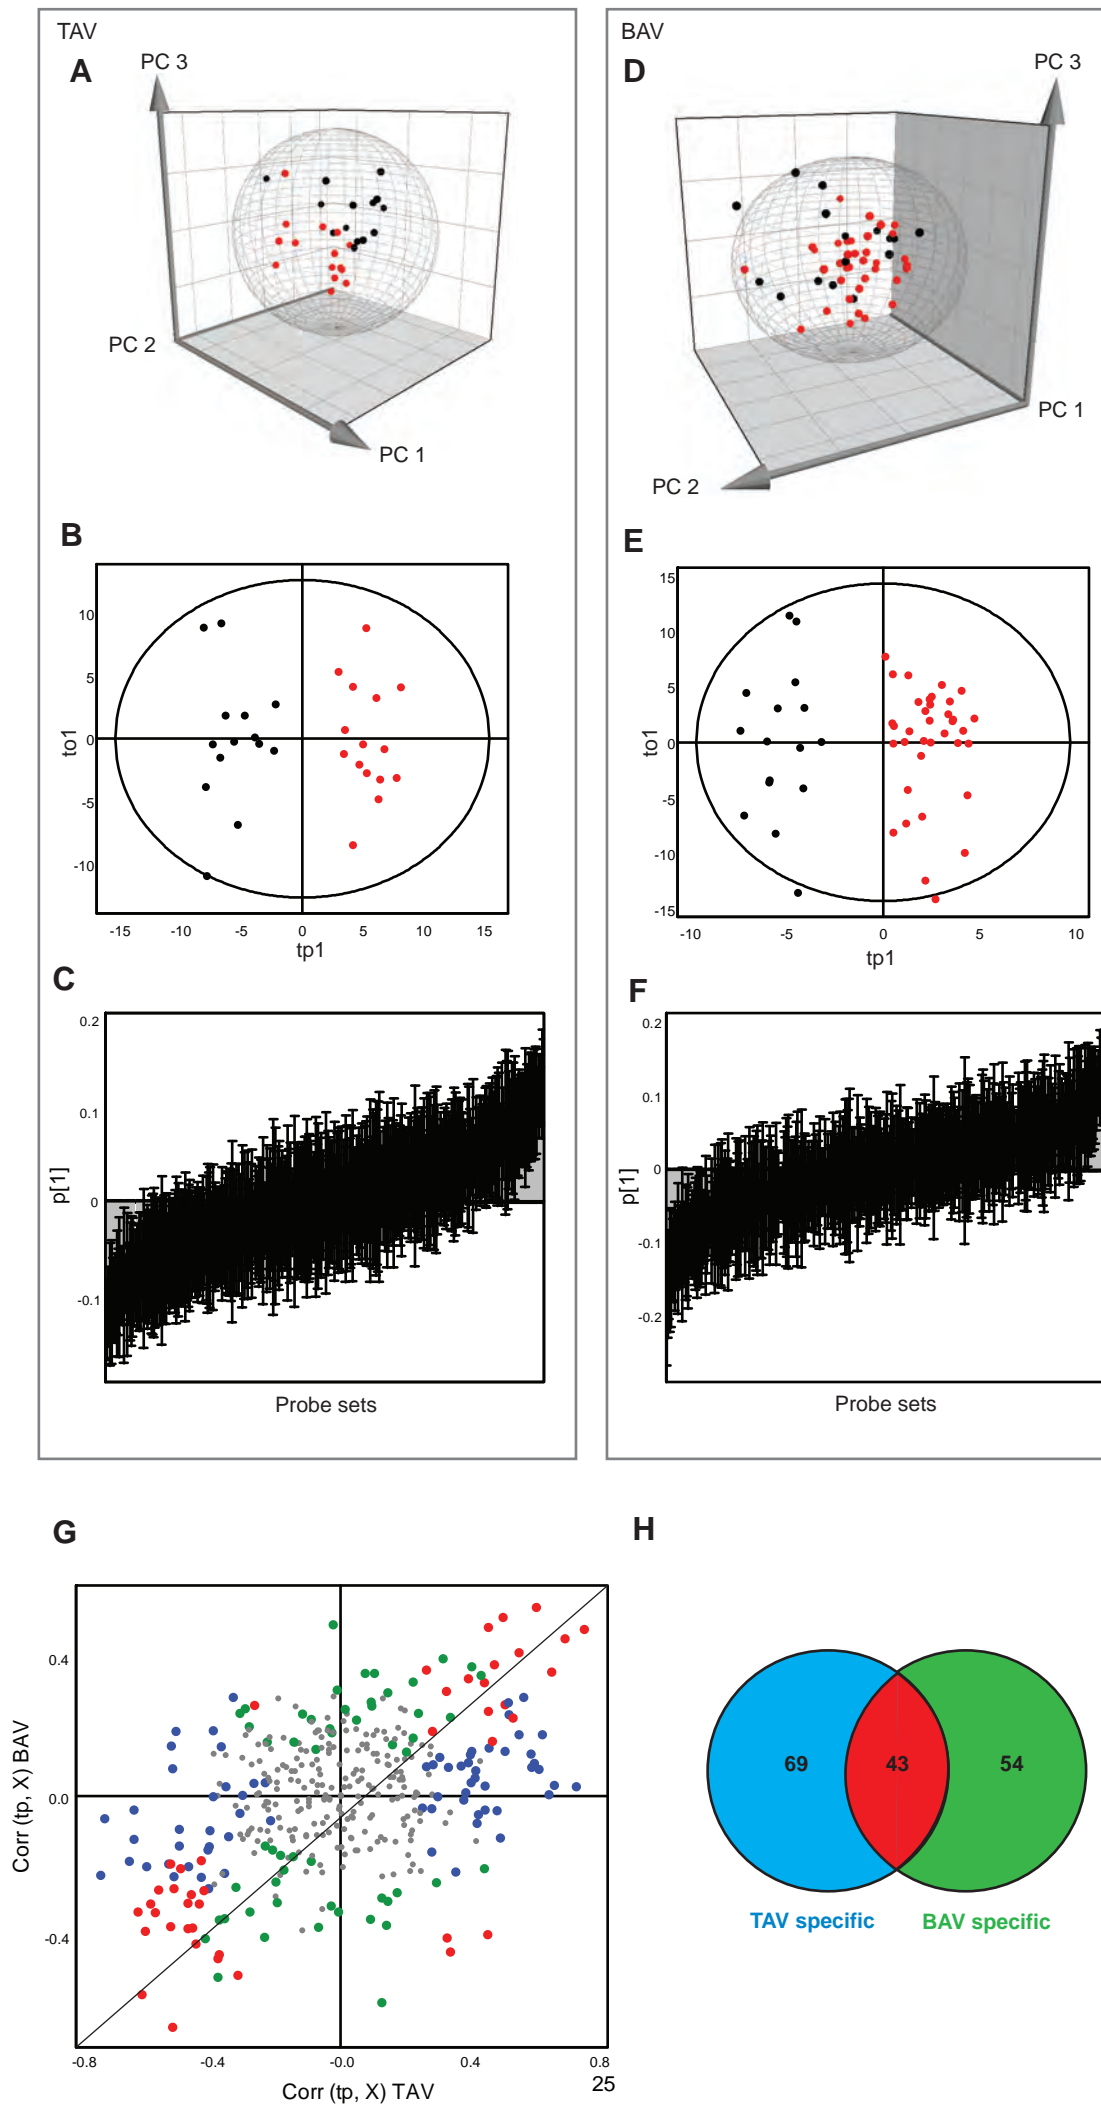

Supplement: supp_M112.021873_mcp.M112.021873-1.pdf [file supp_M112.021873_mcp.M112.021873-1.pdf]
