# Supplementary material
Source: PubMed Central journal article supplement (PMC3567863)

90

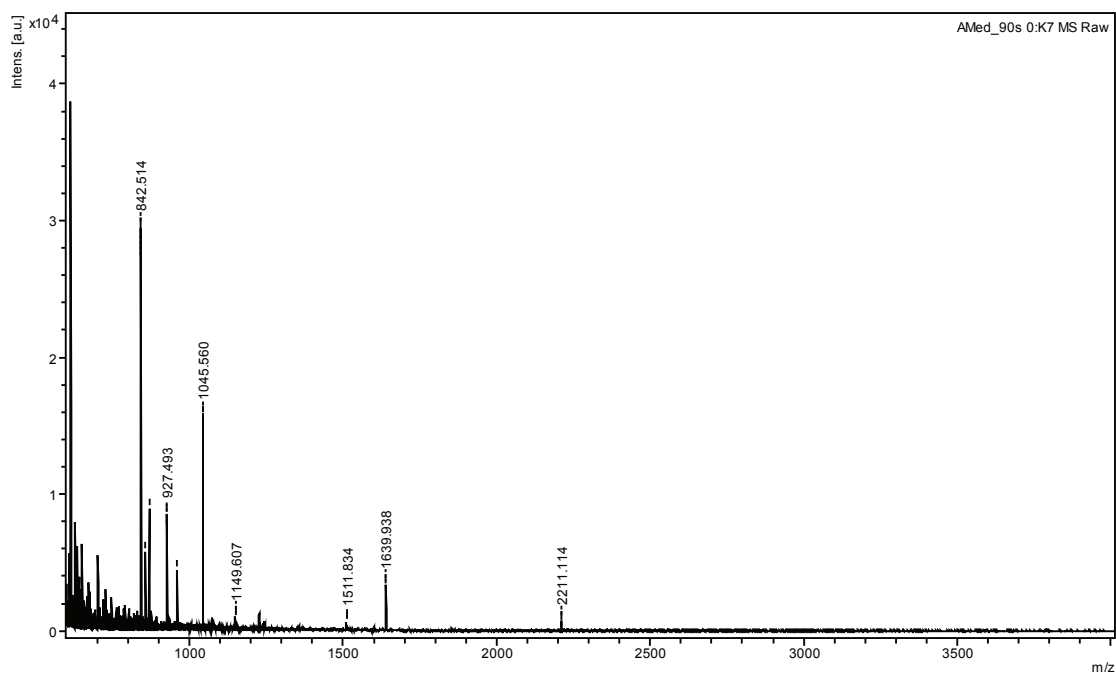

94

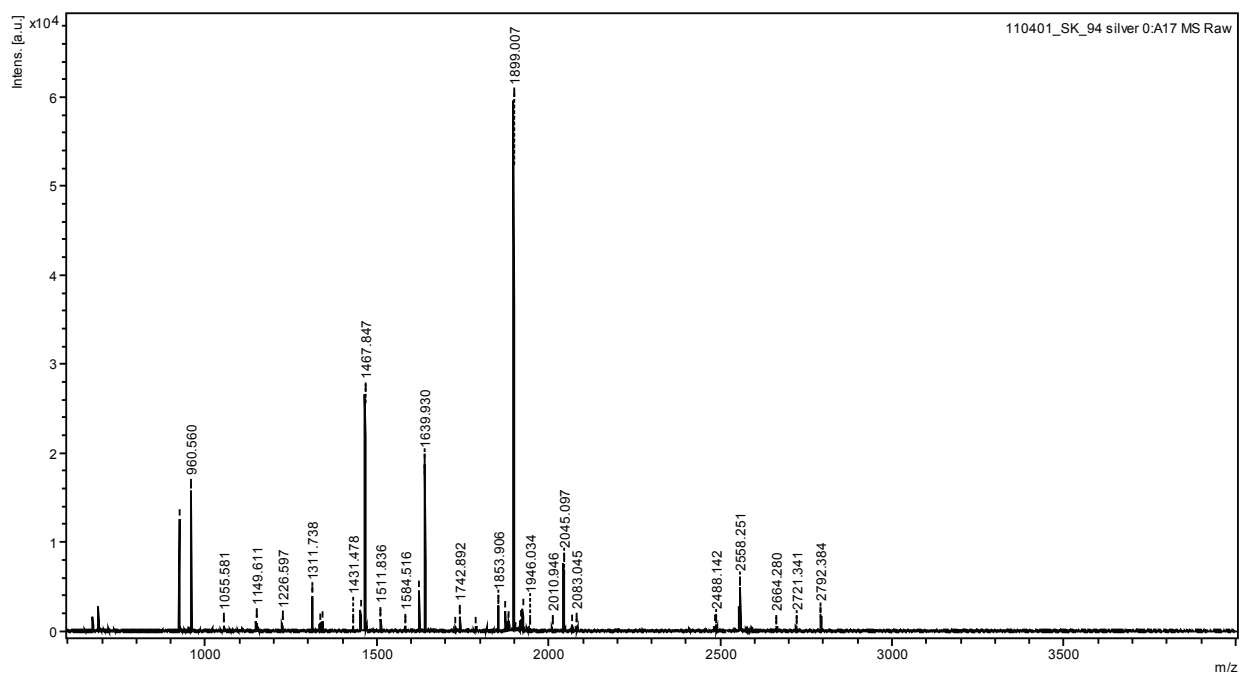

96

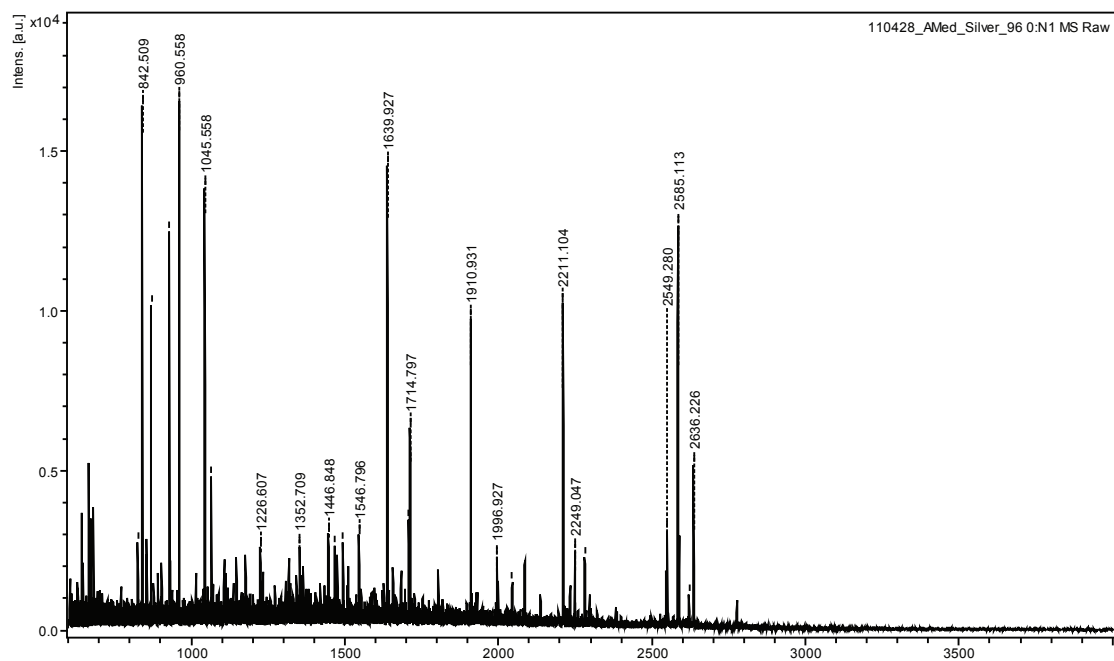

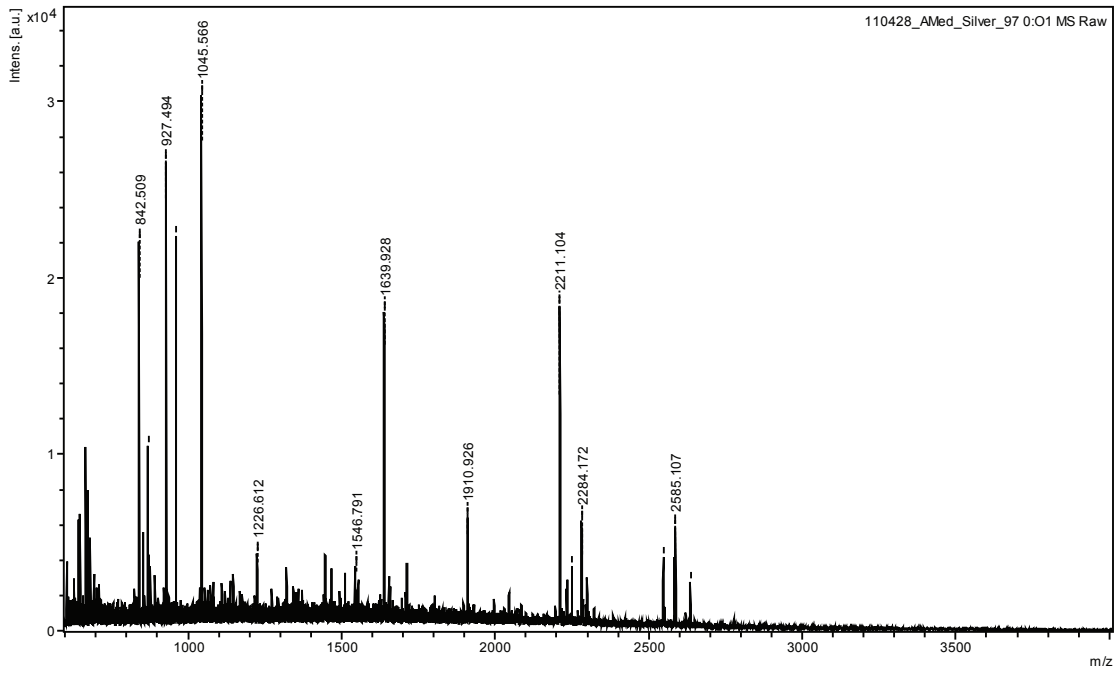

99

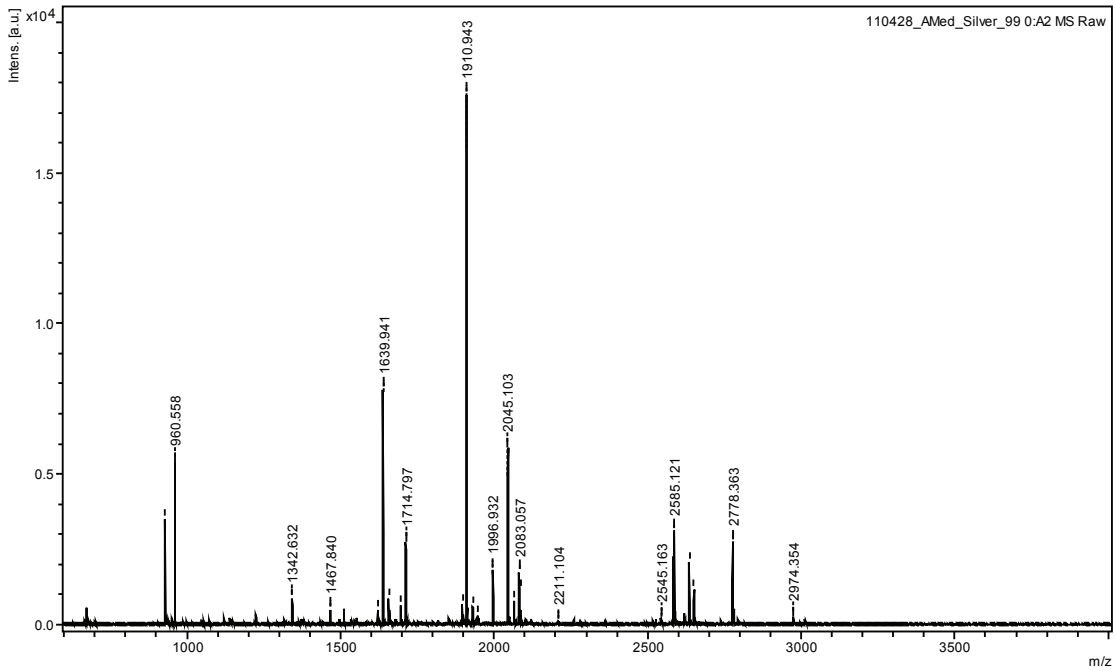

100

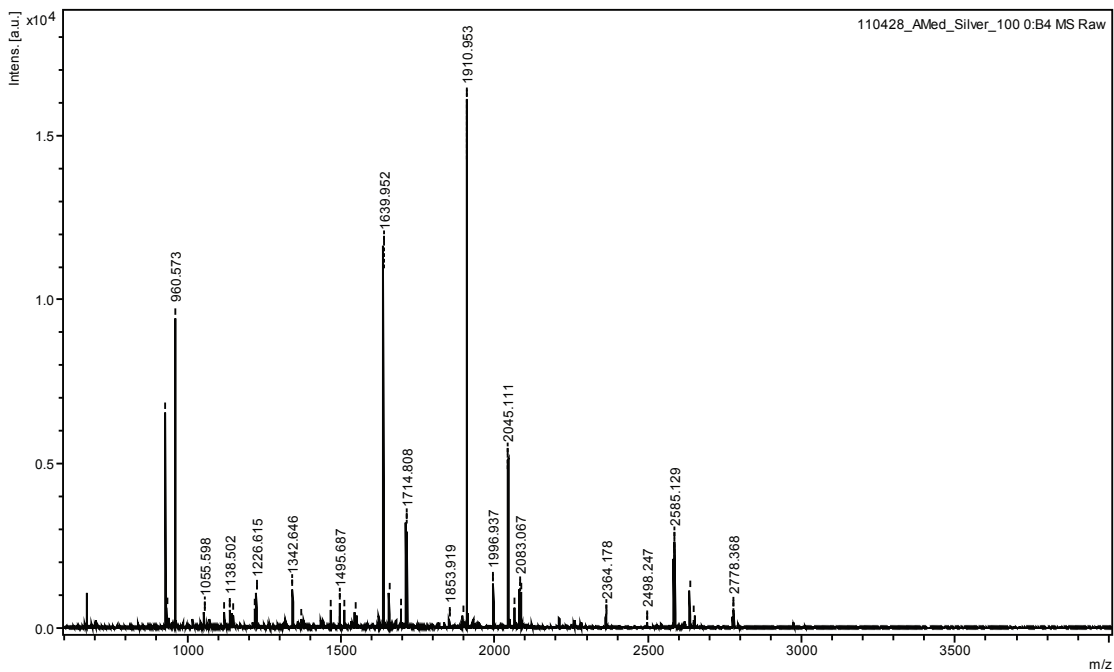

101

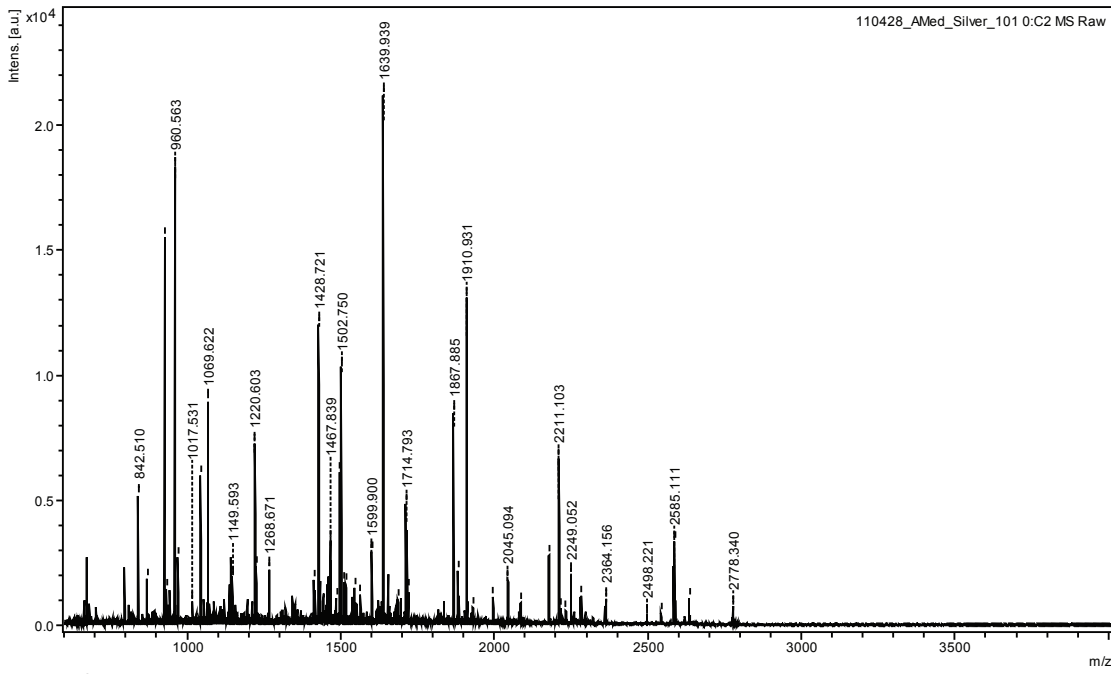

105

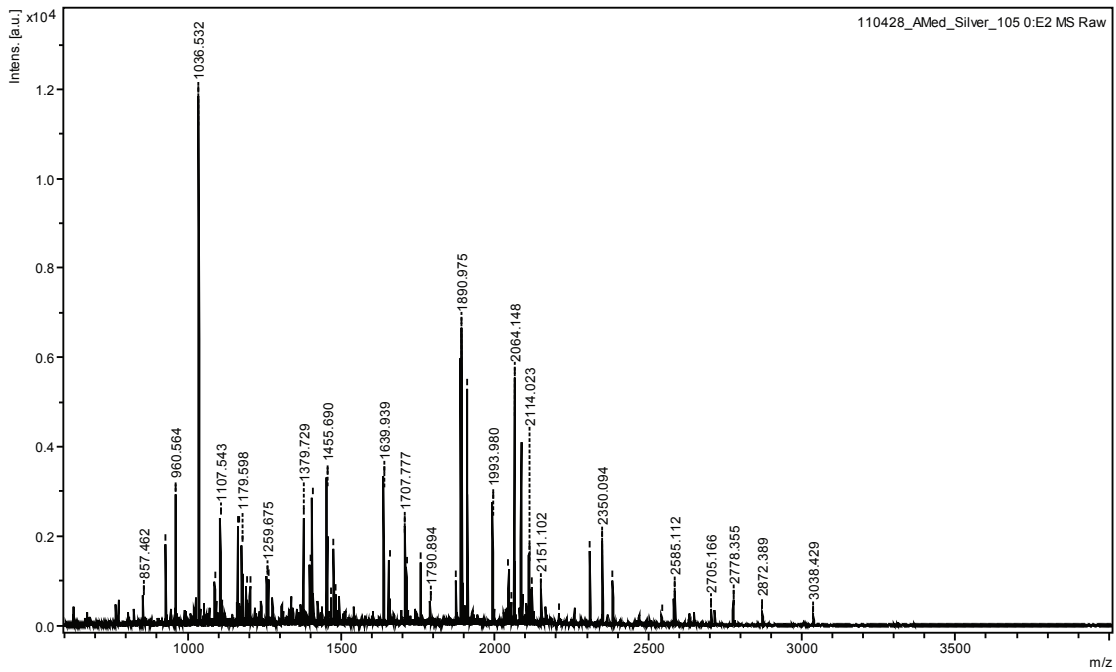

109

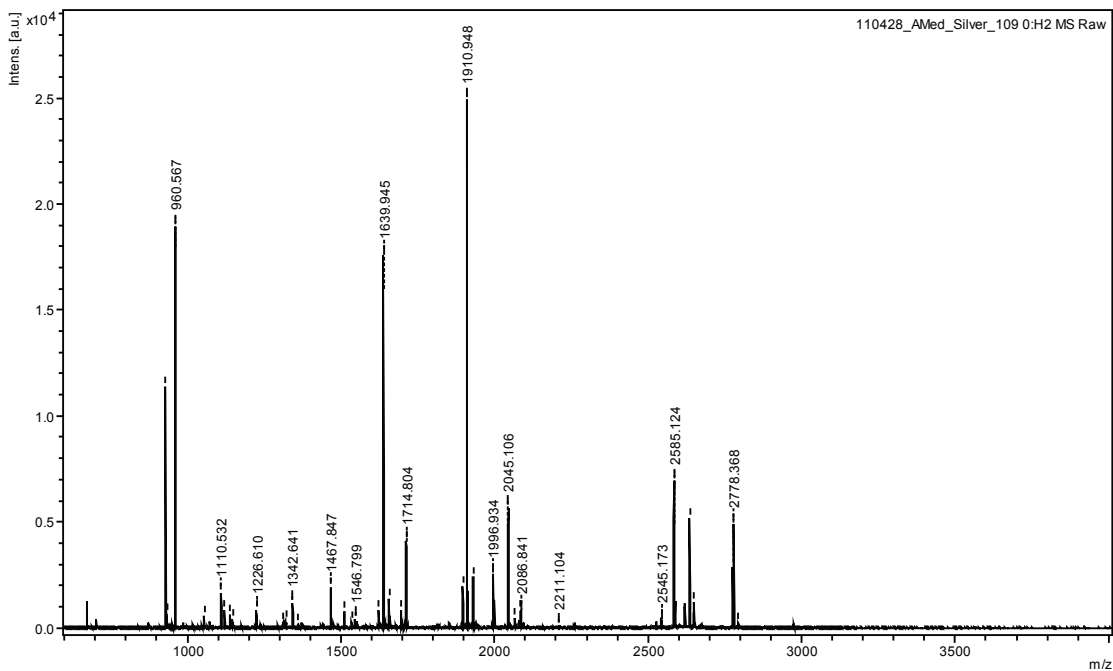

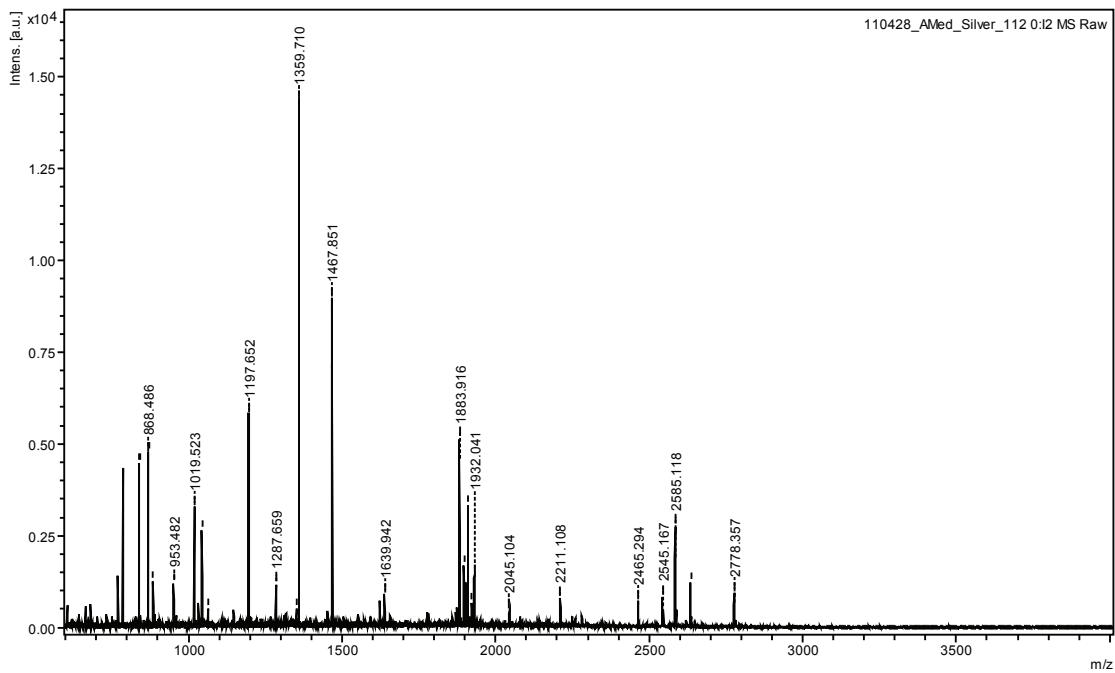

256

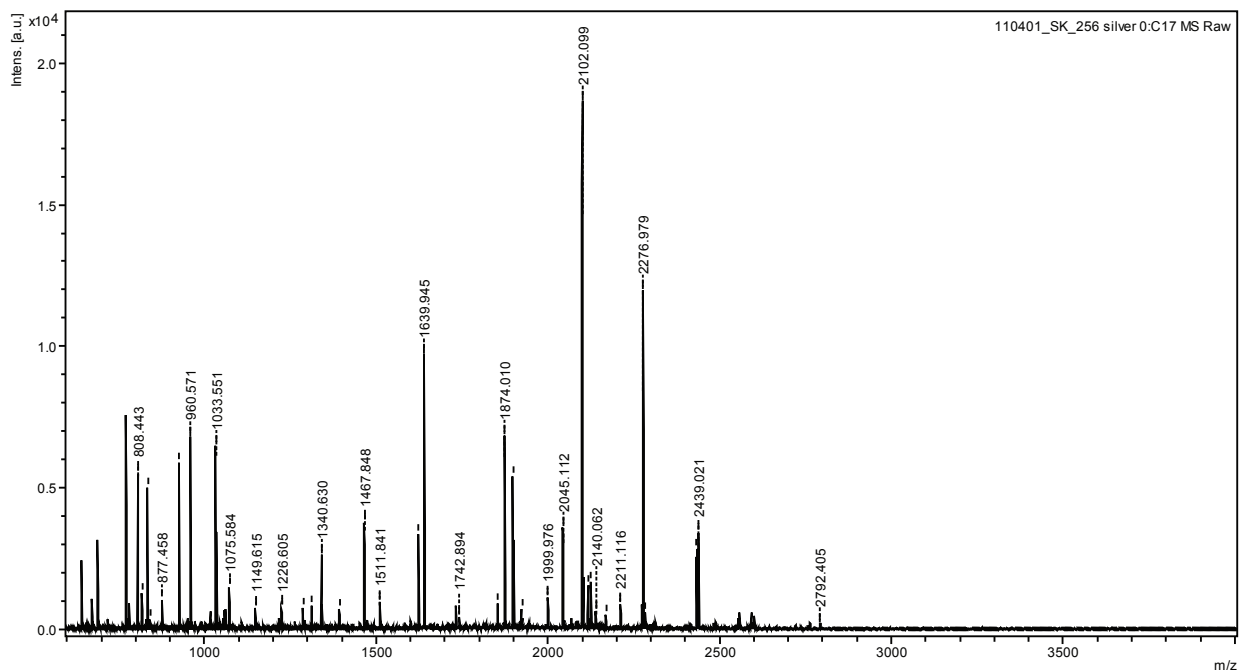

116\_115

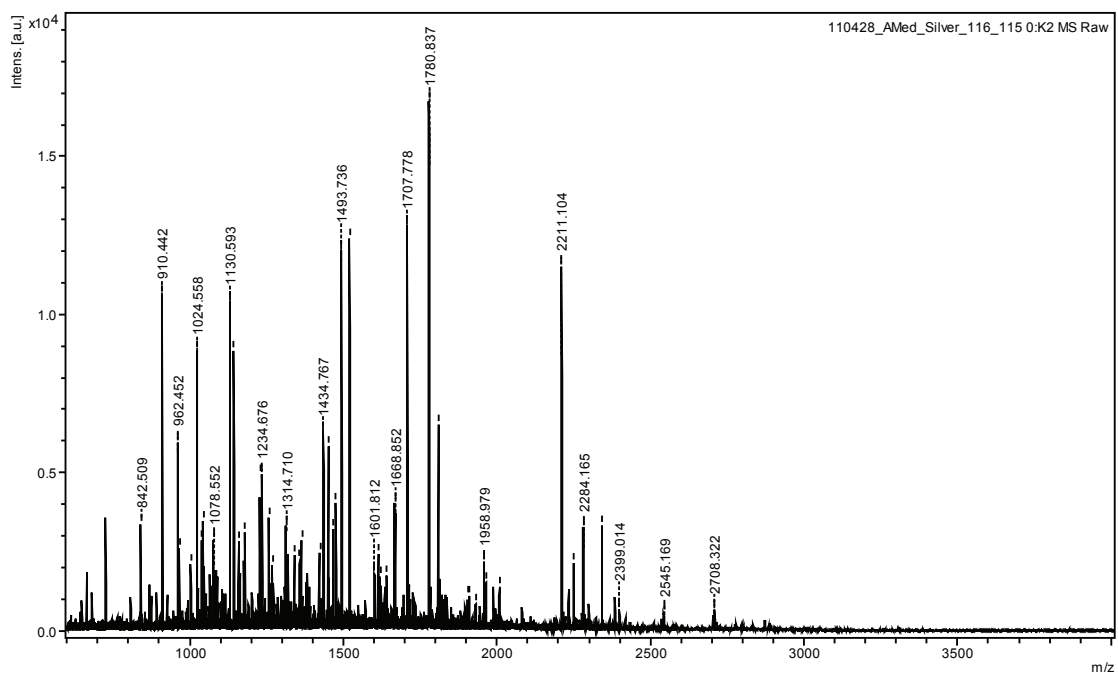

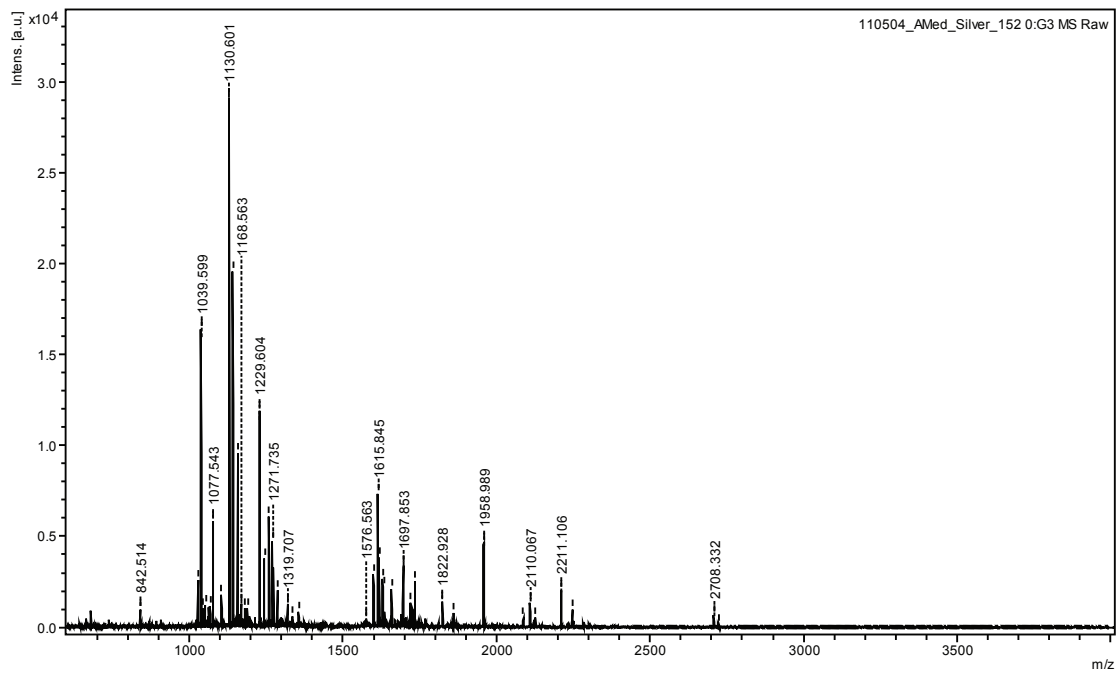

153

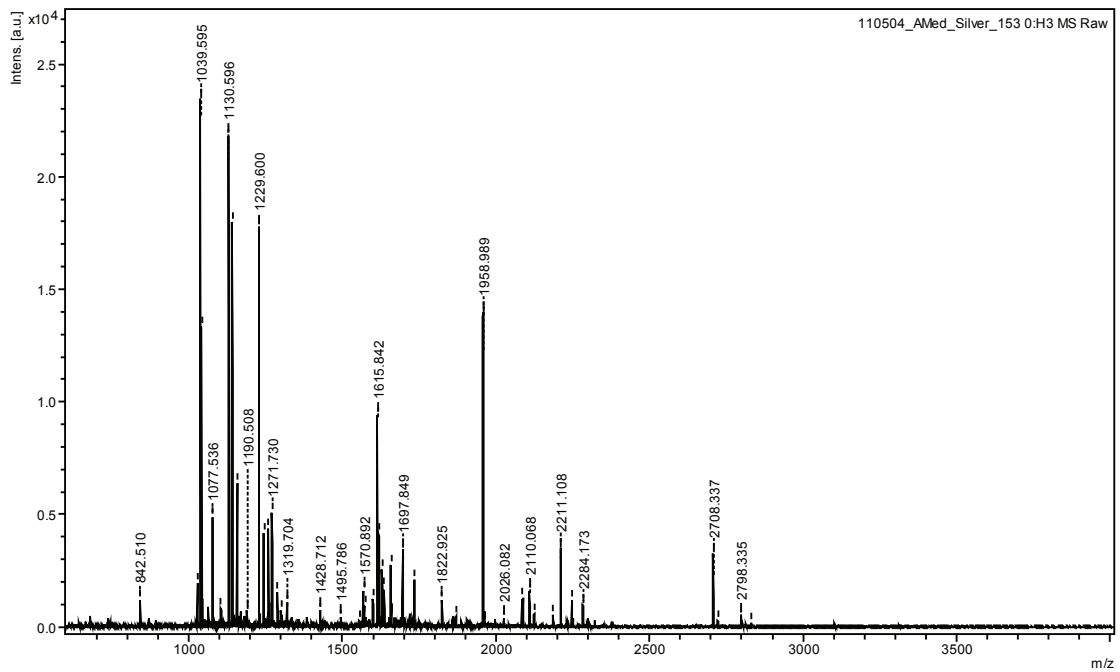

198

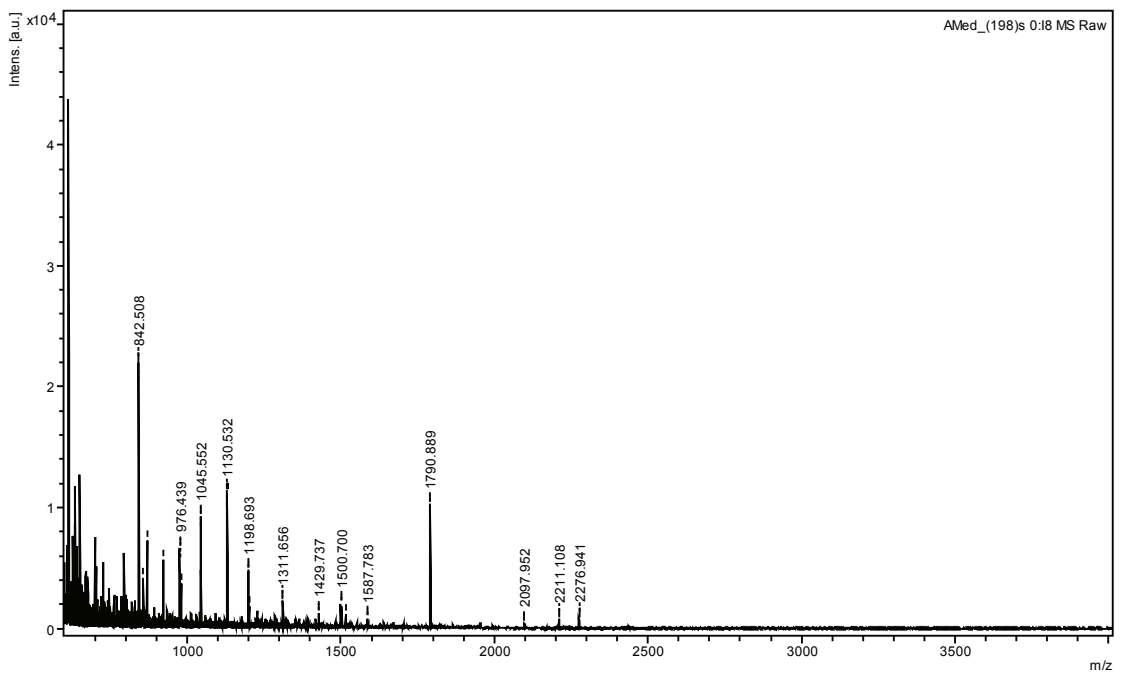

203

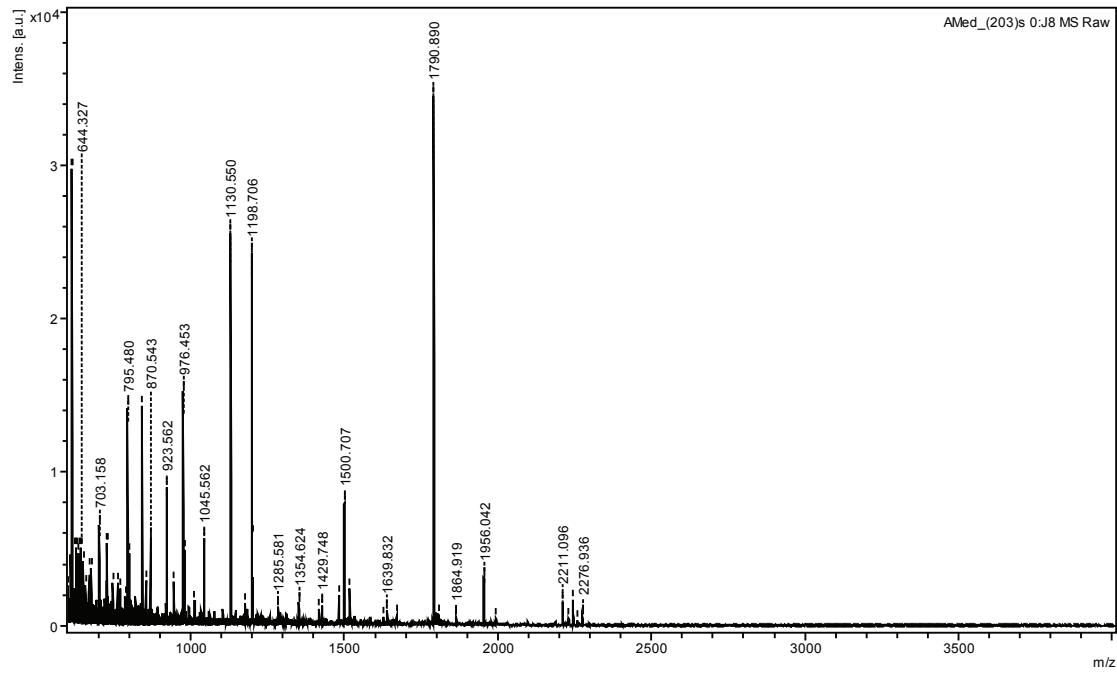

207

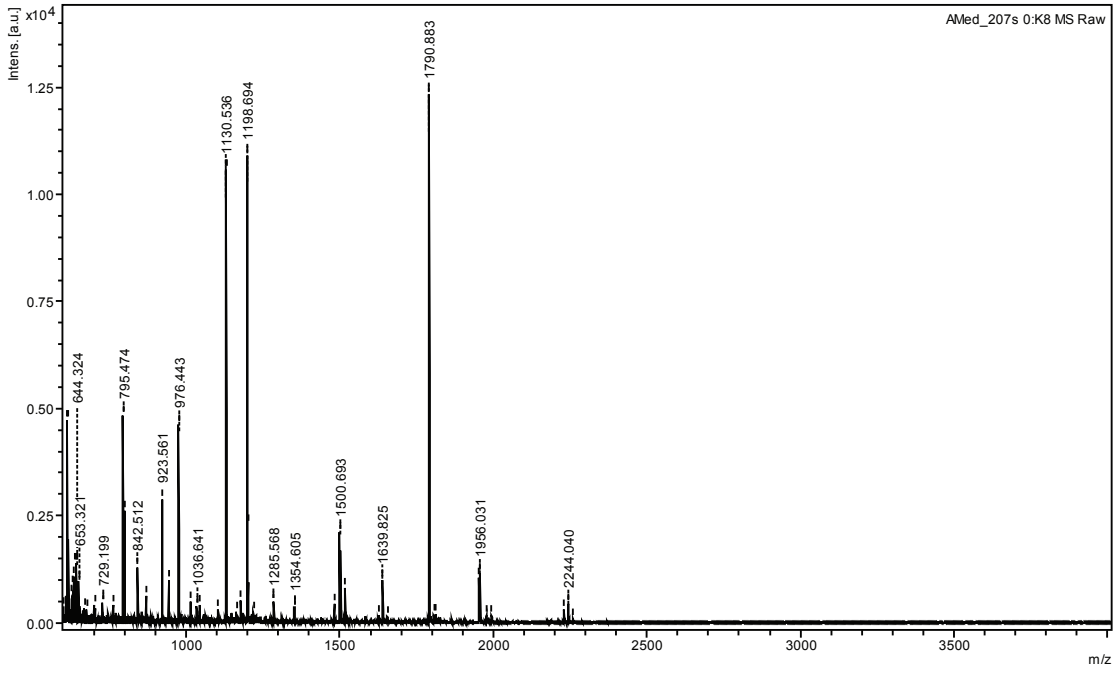

762\_761

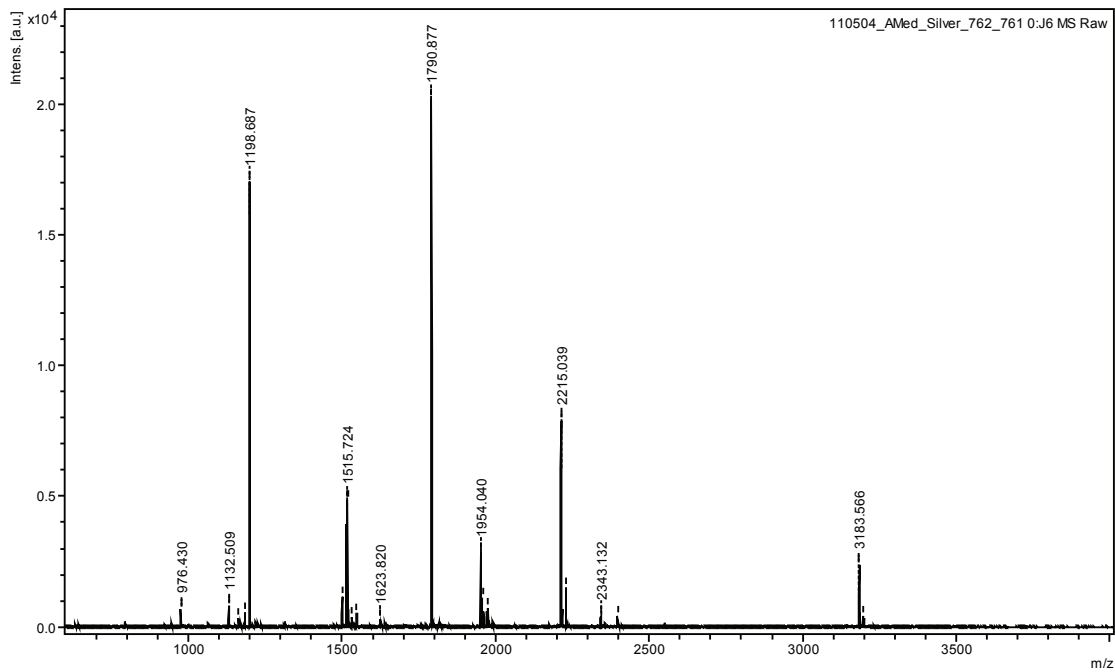

769\_771

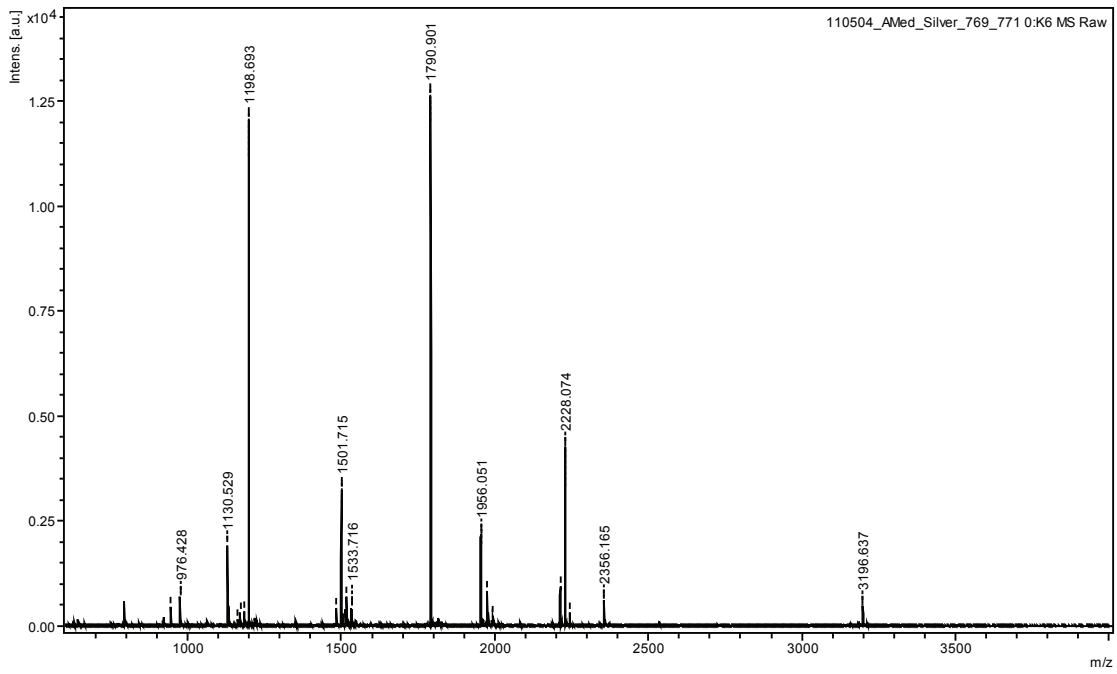

778\_776

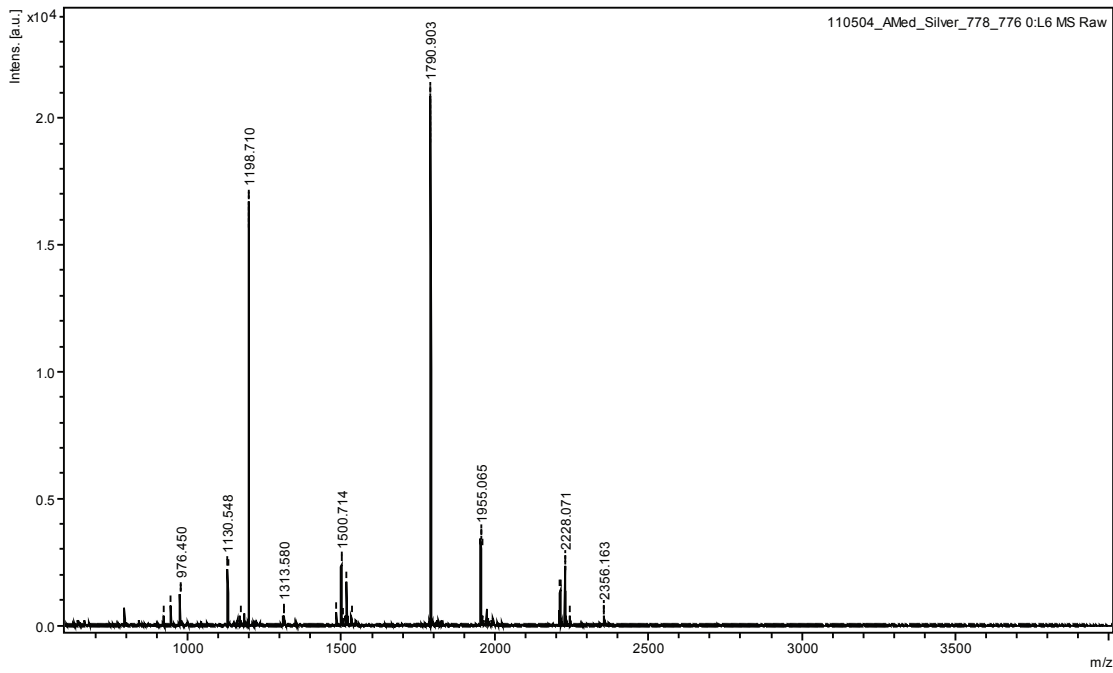

282

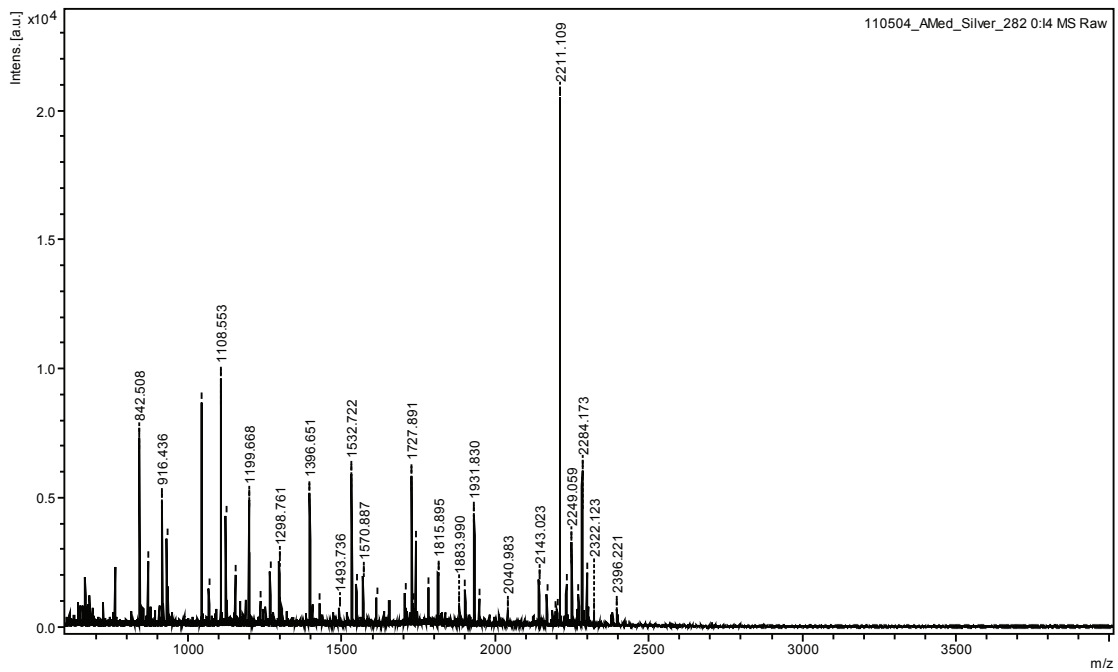

287

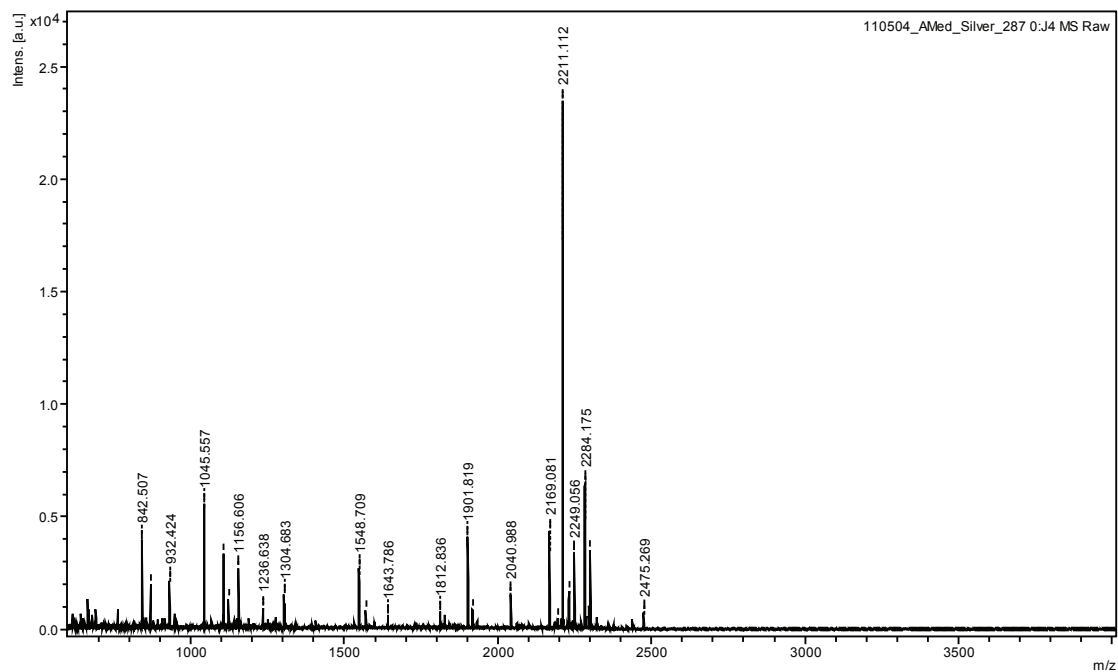

291

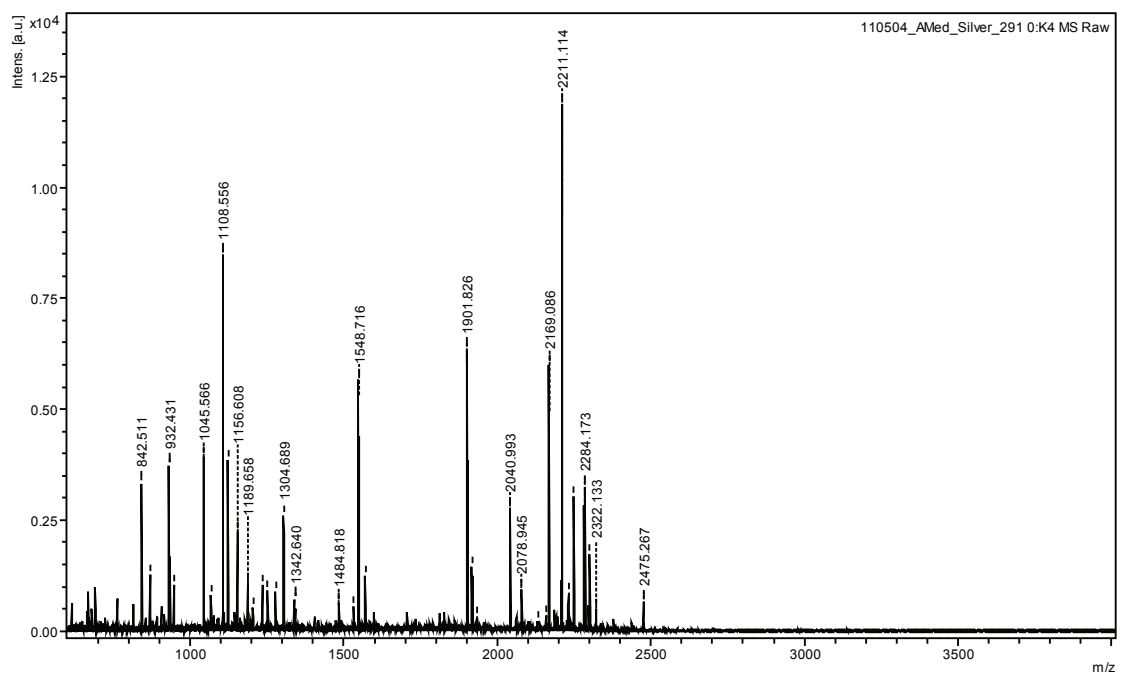

791

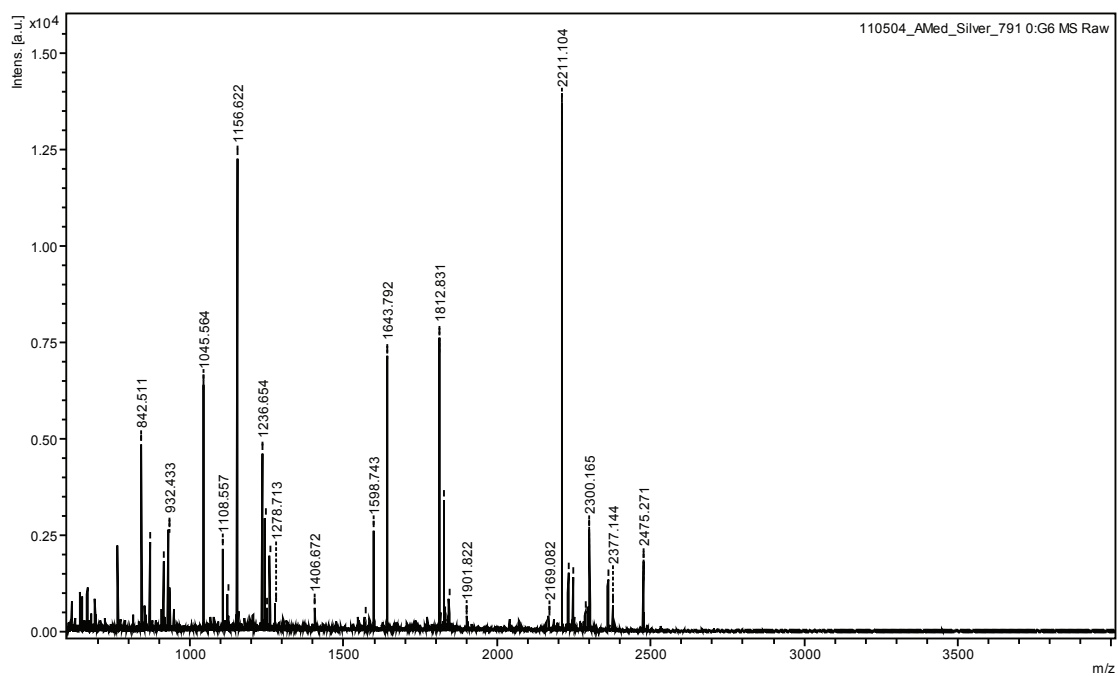



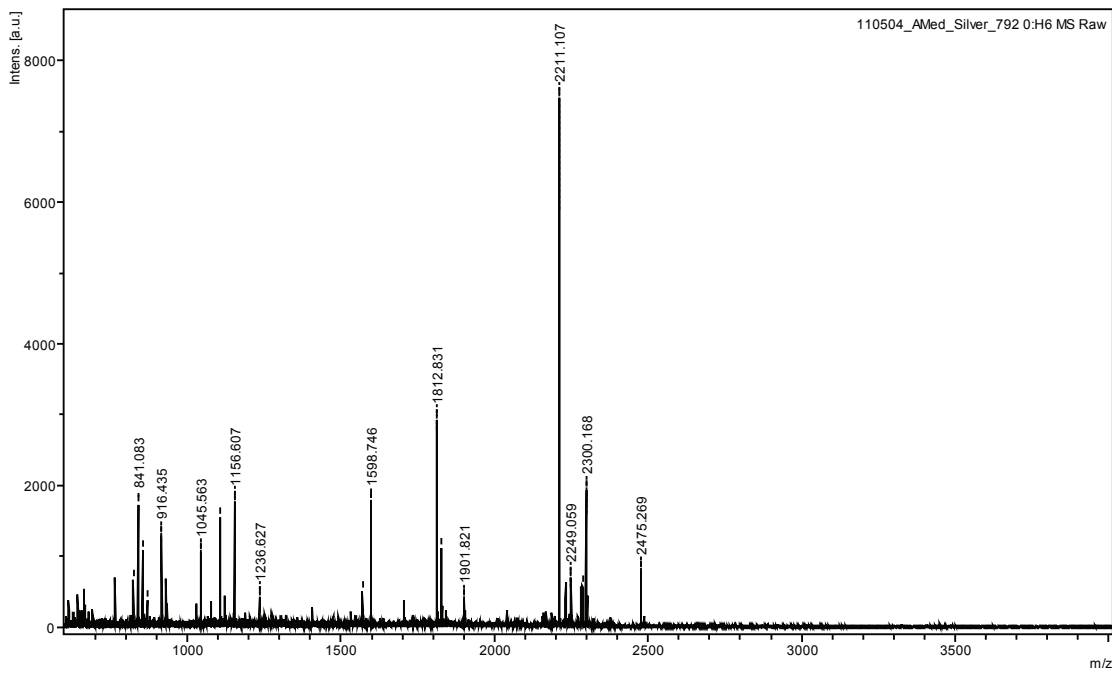

224

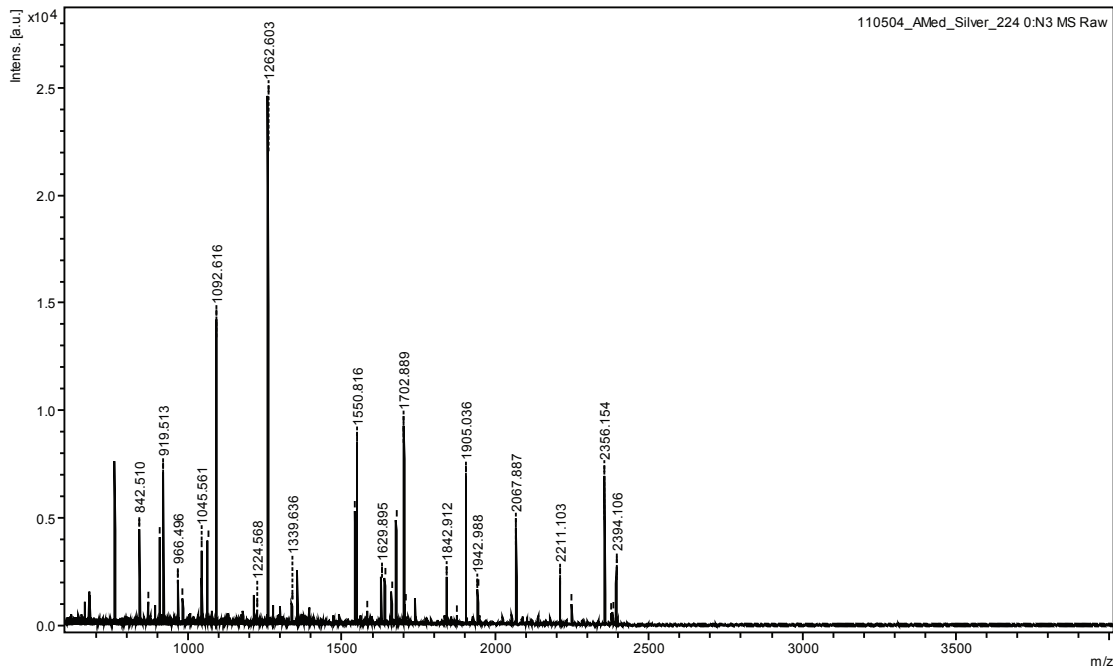

268

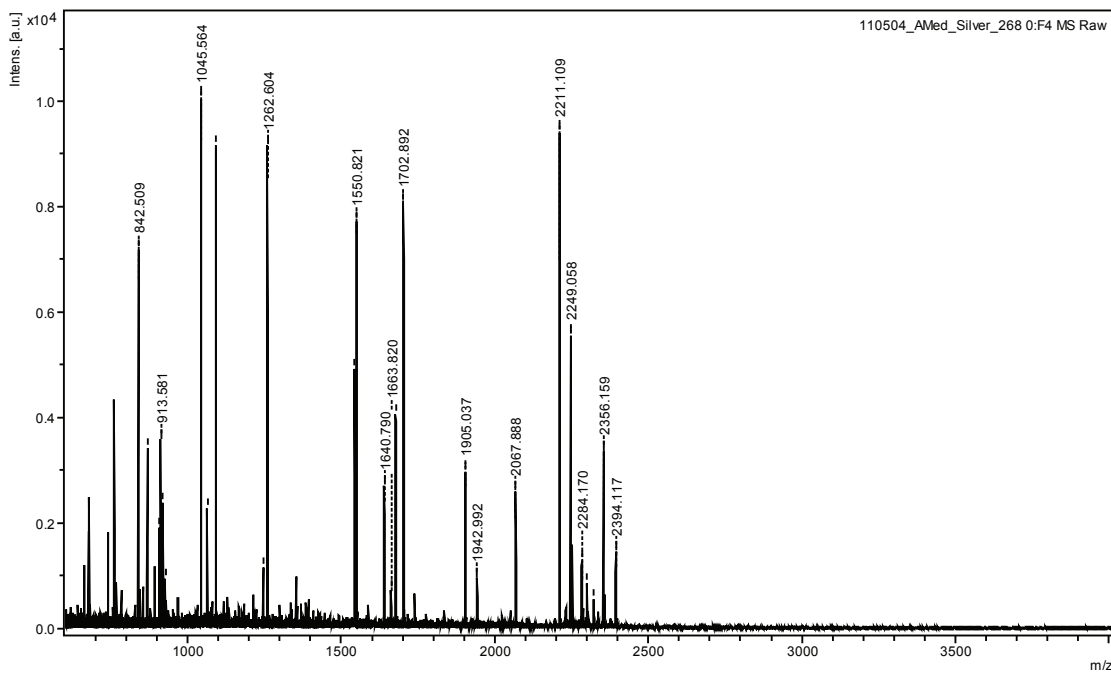

270

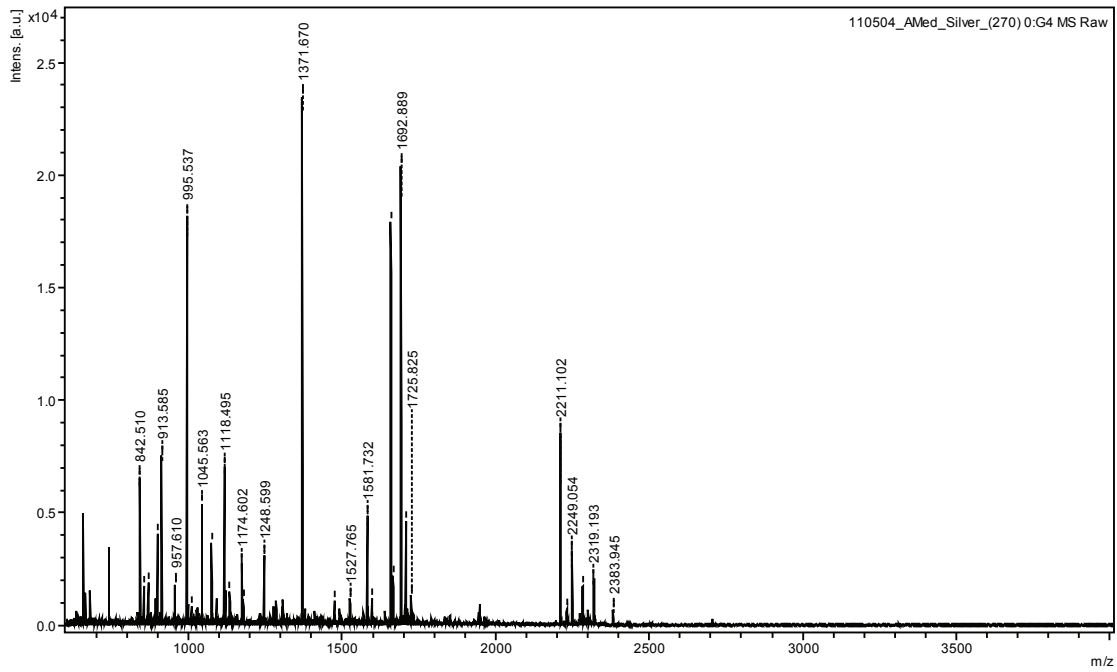

273

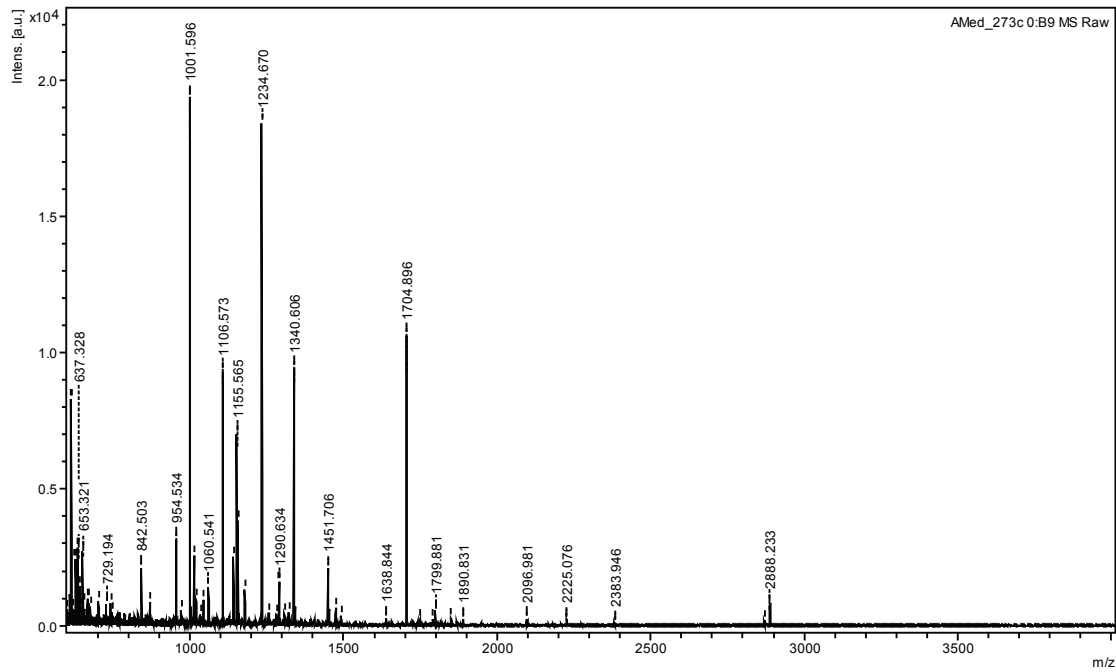

362

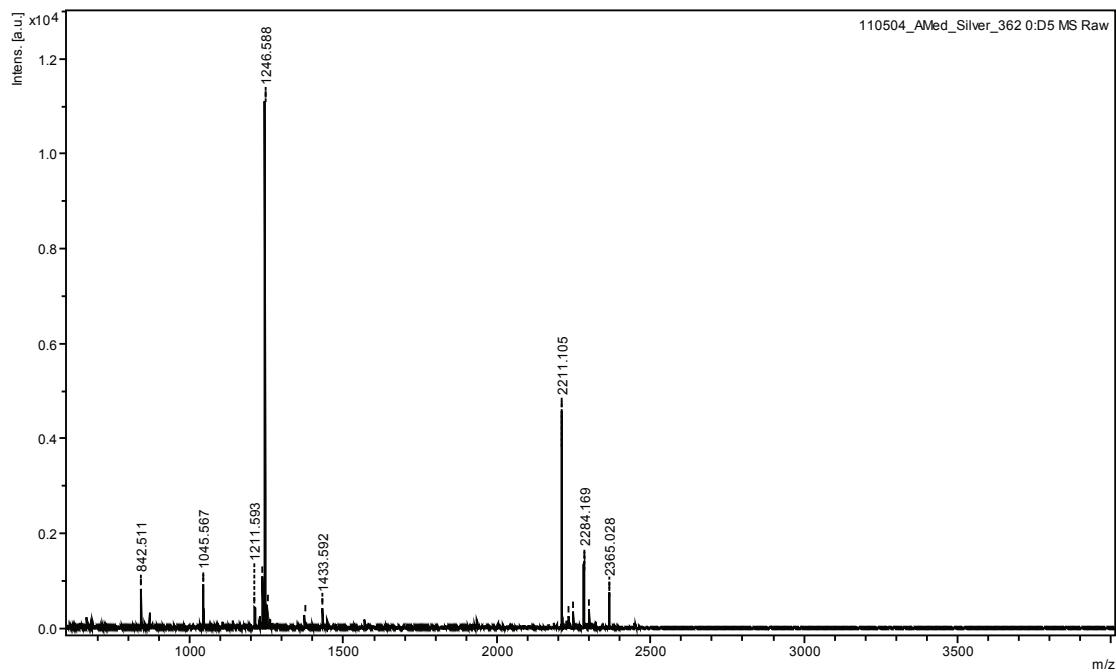

371

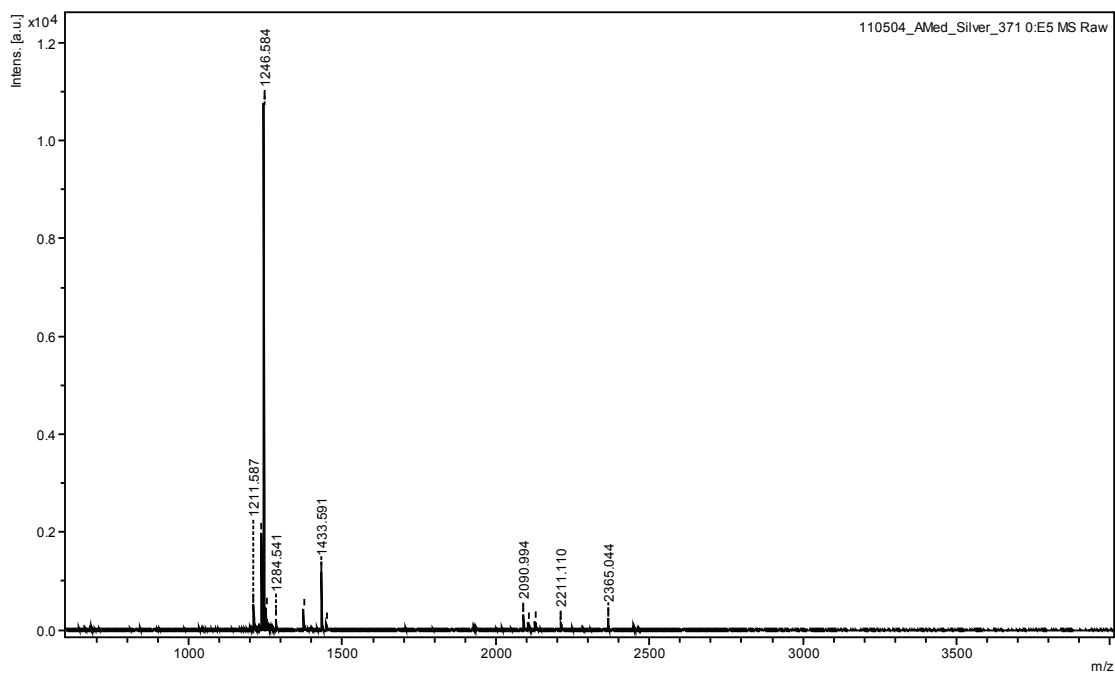

375

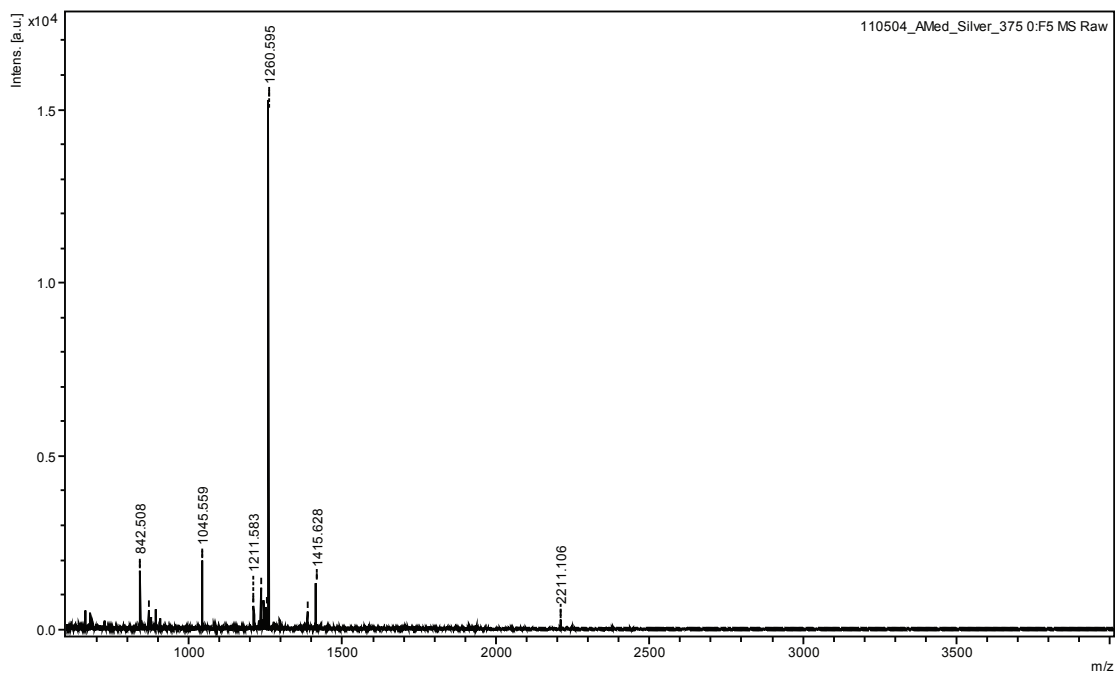

383

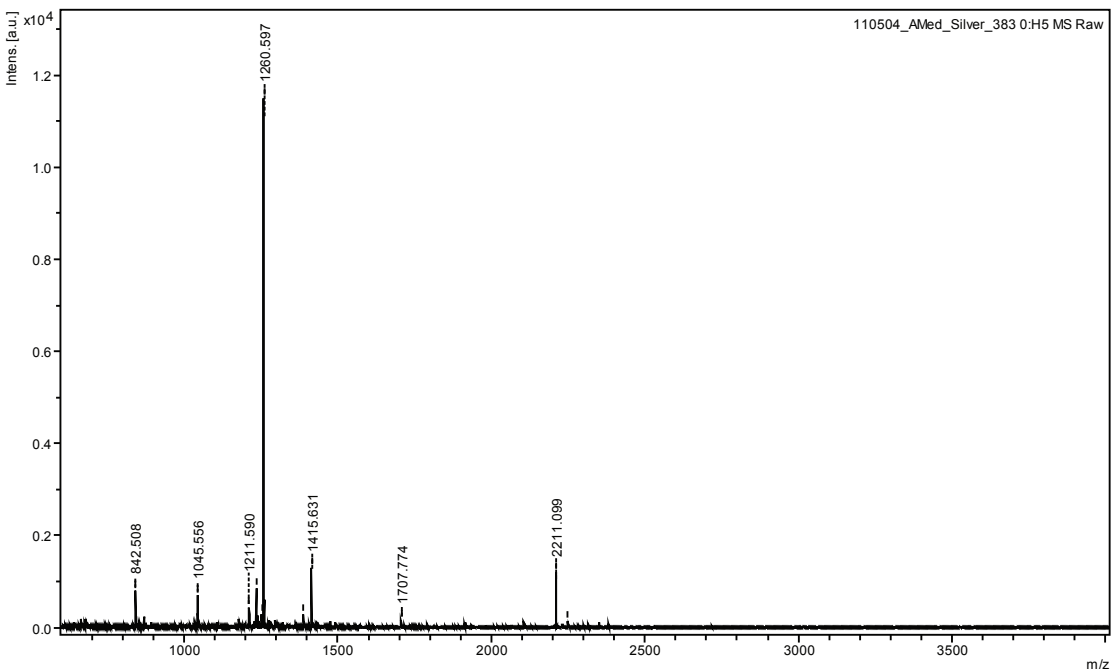

422

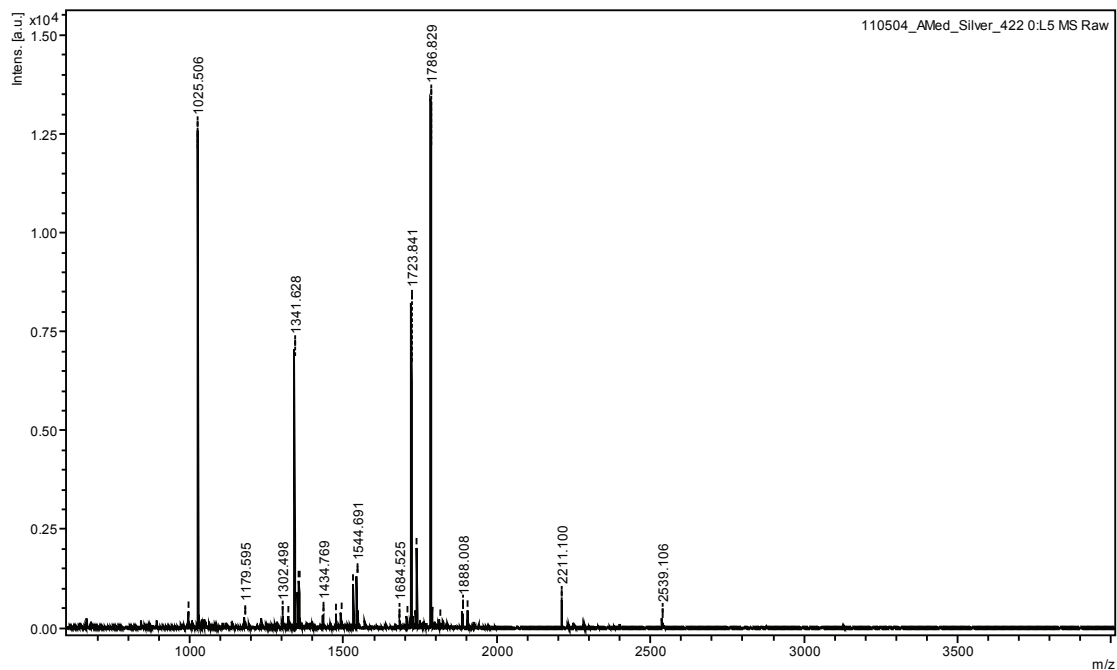

58

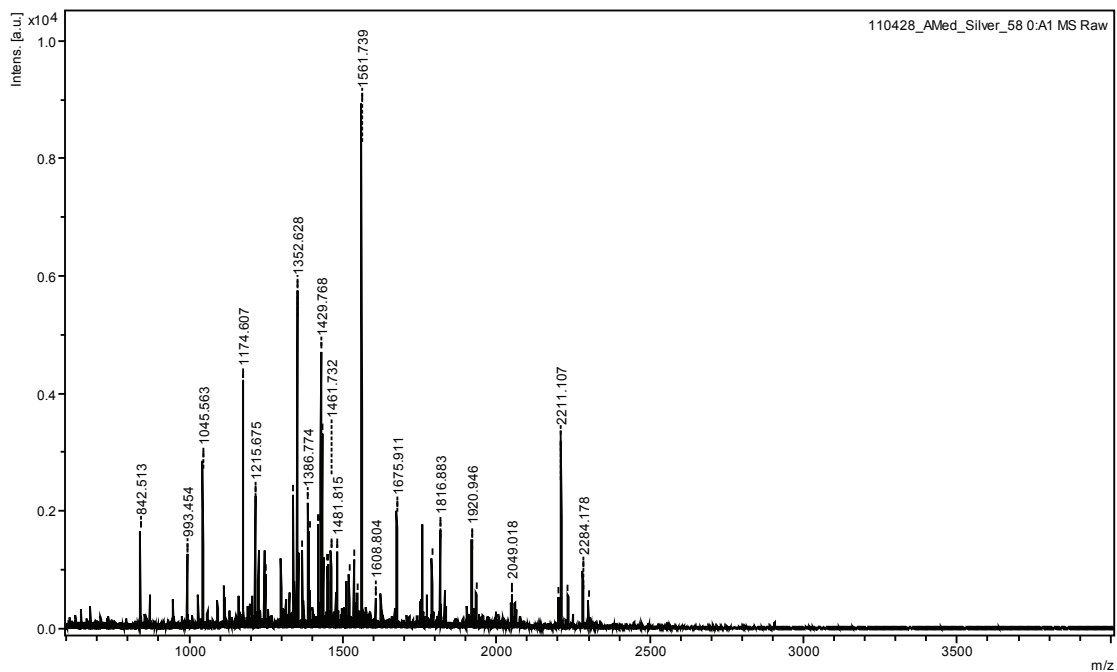

59

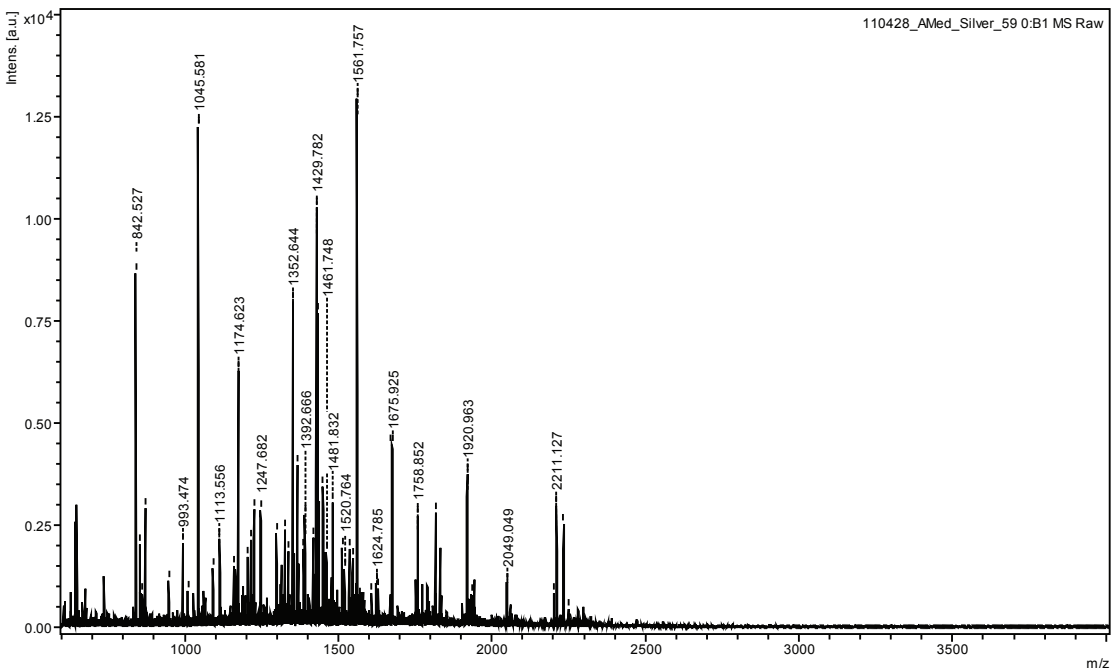

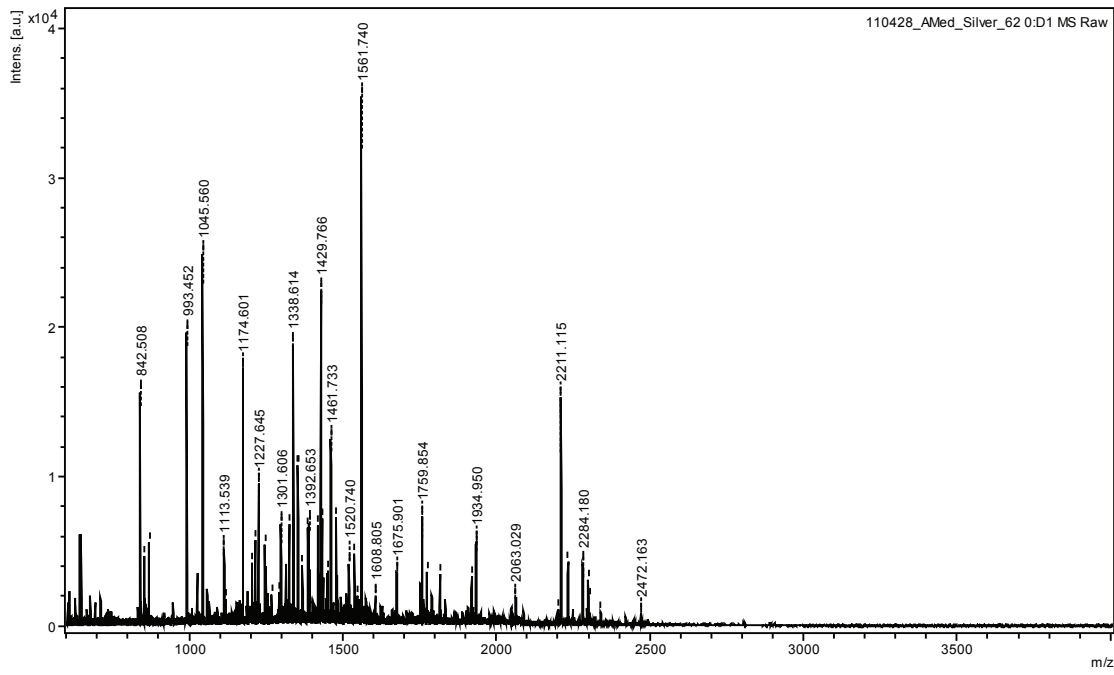

755

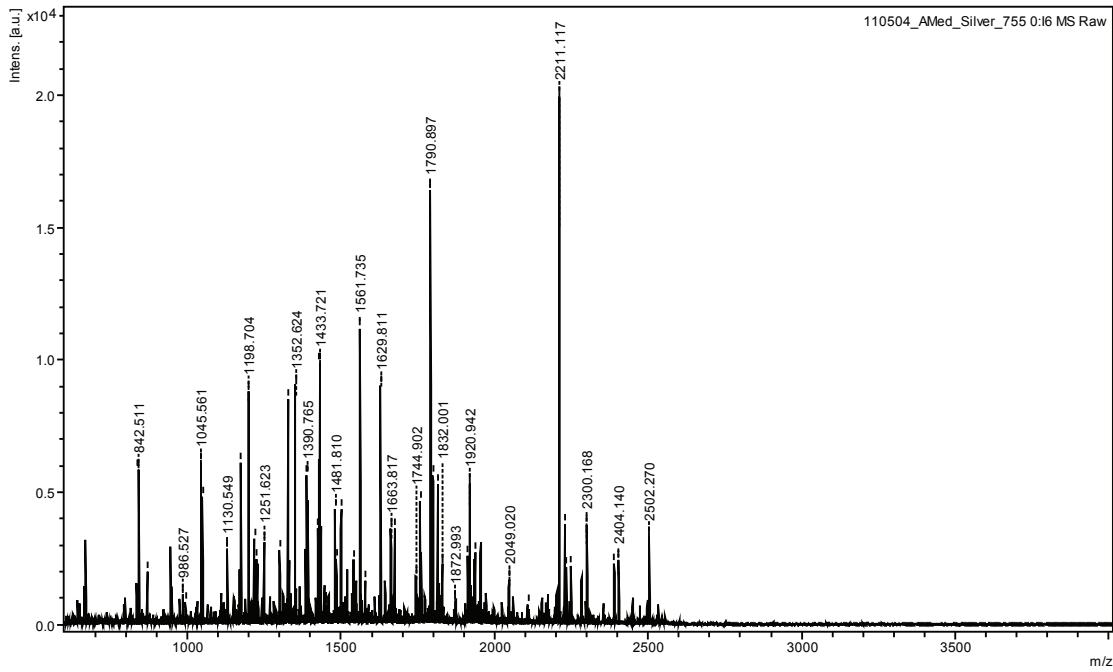

754

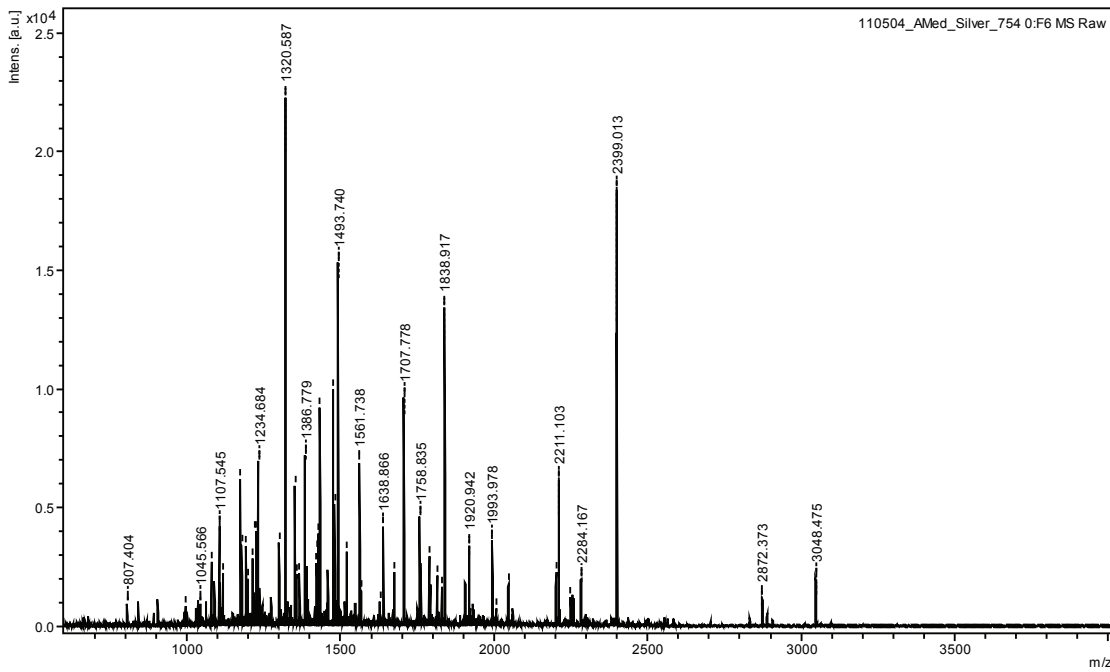

64

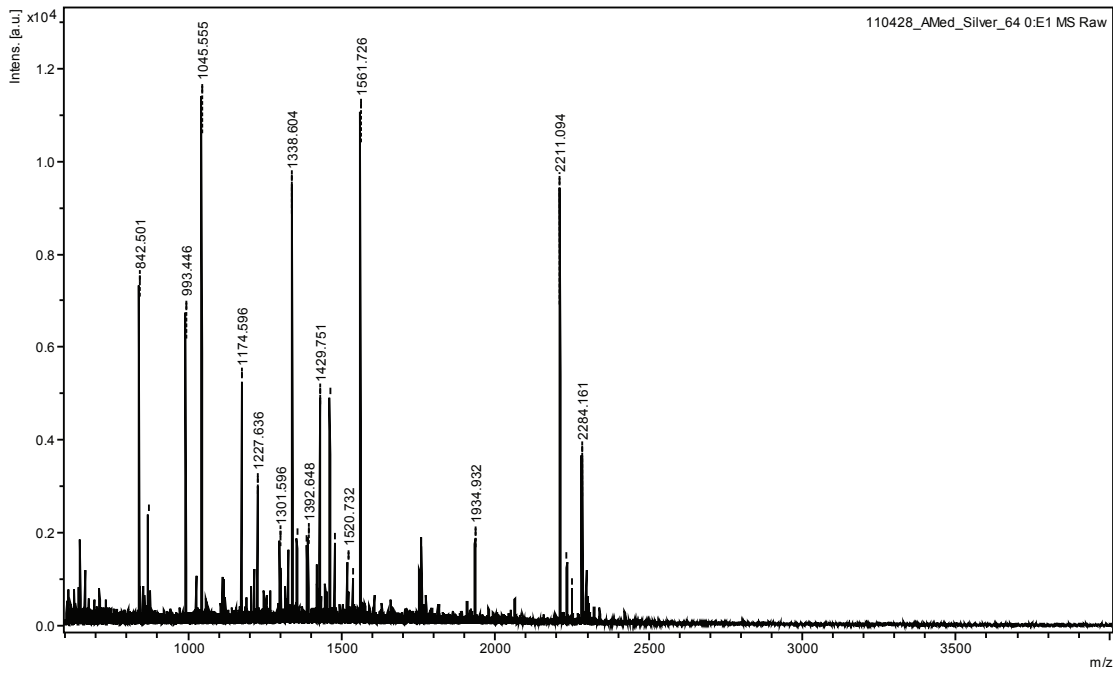

65

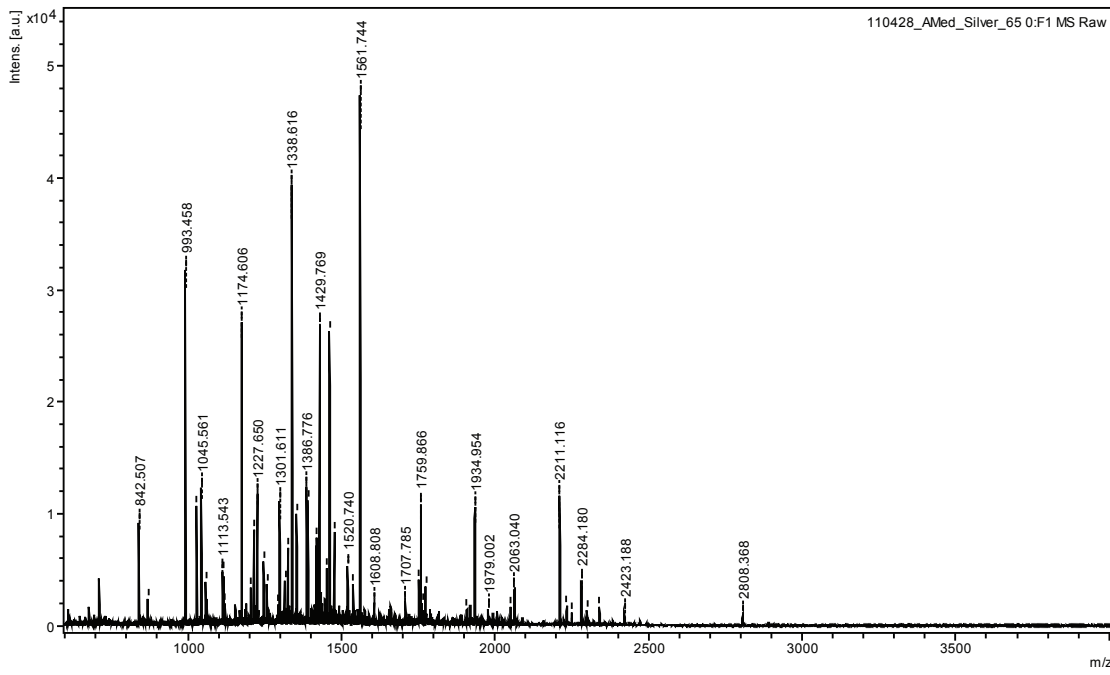

339

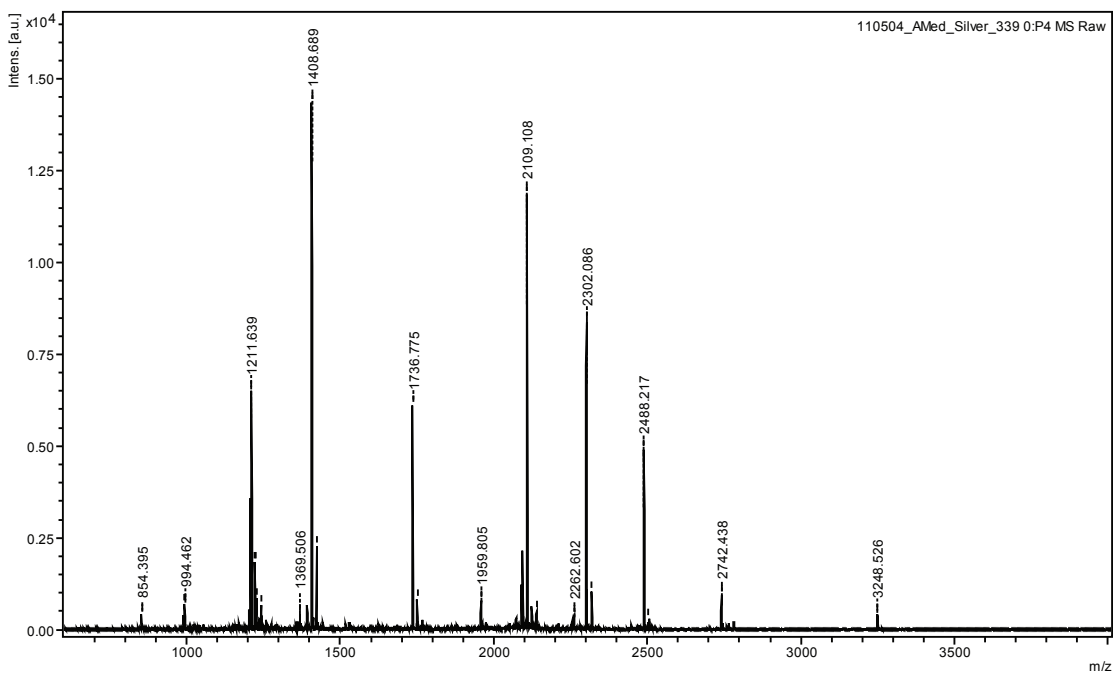

345

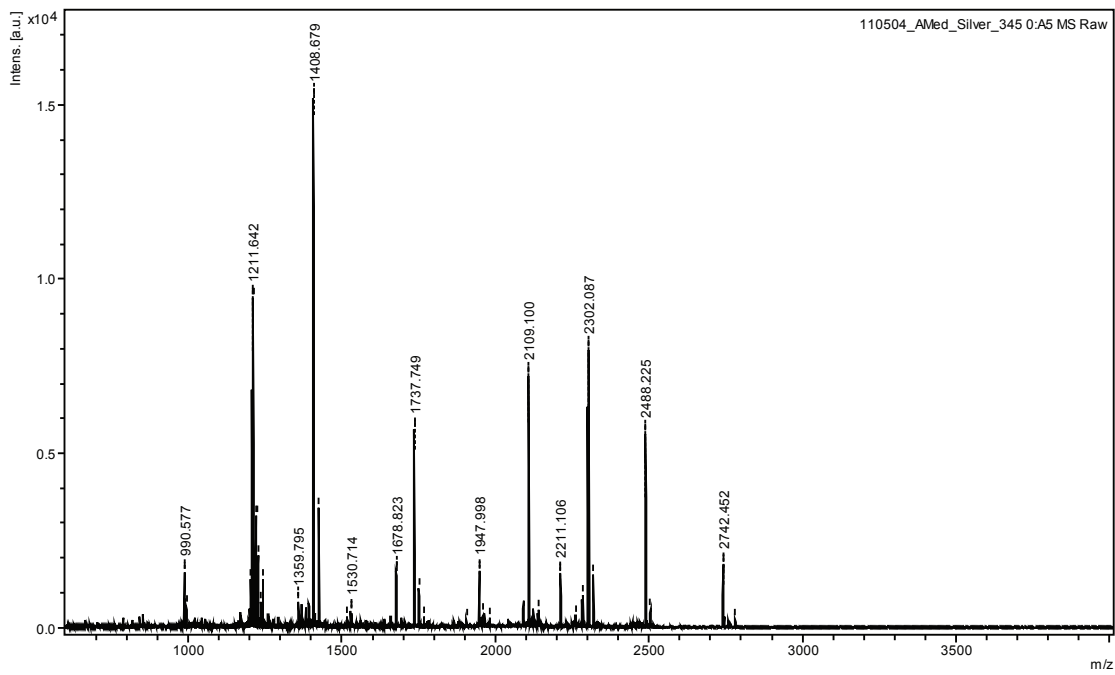

355

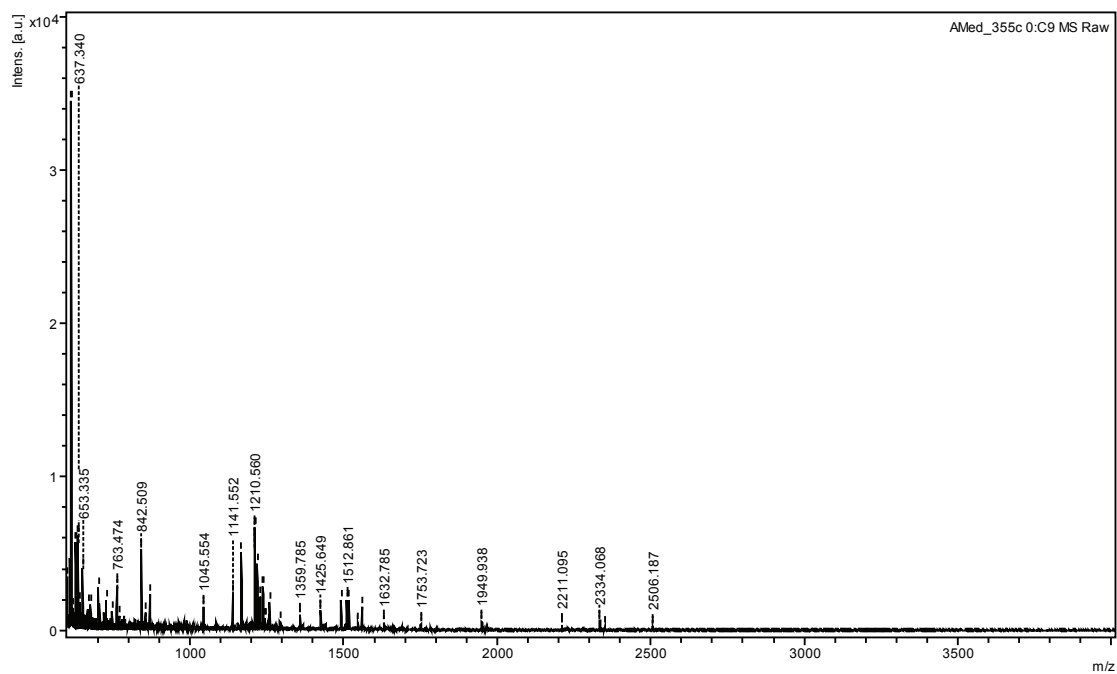

389

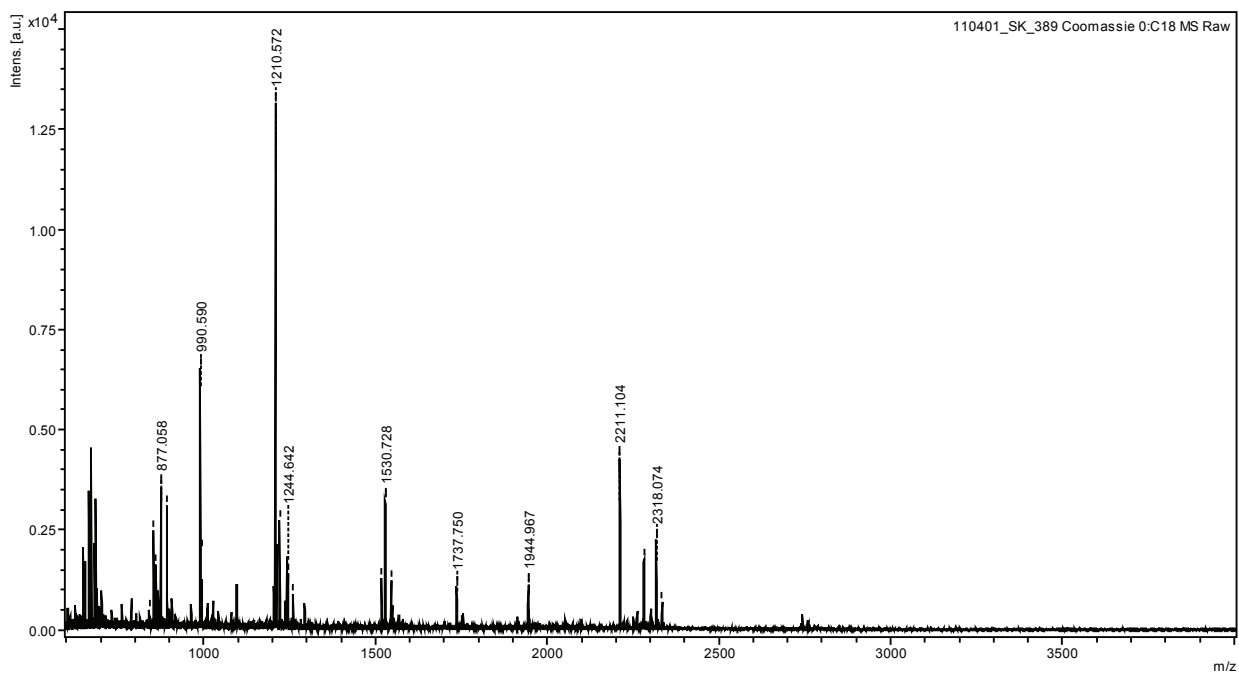

394

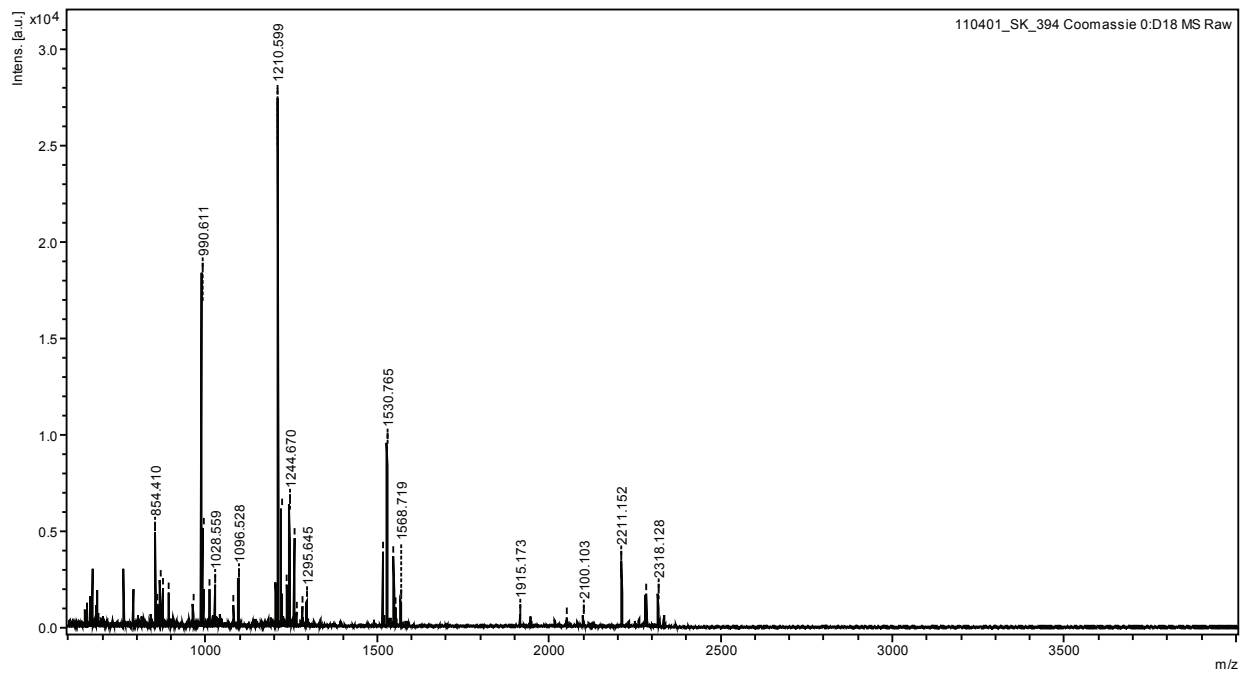

363

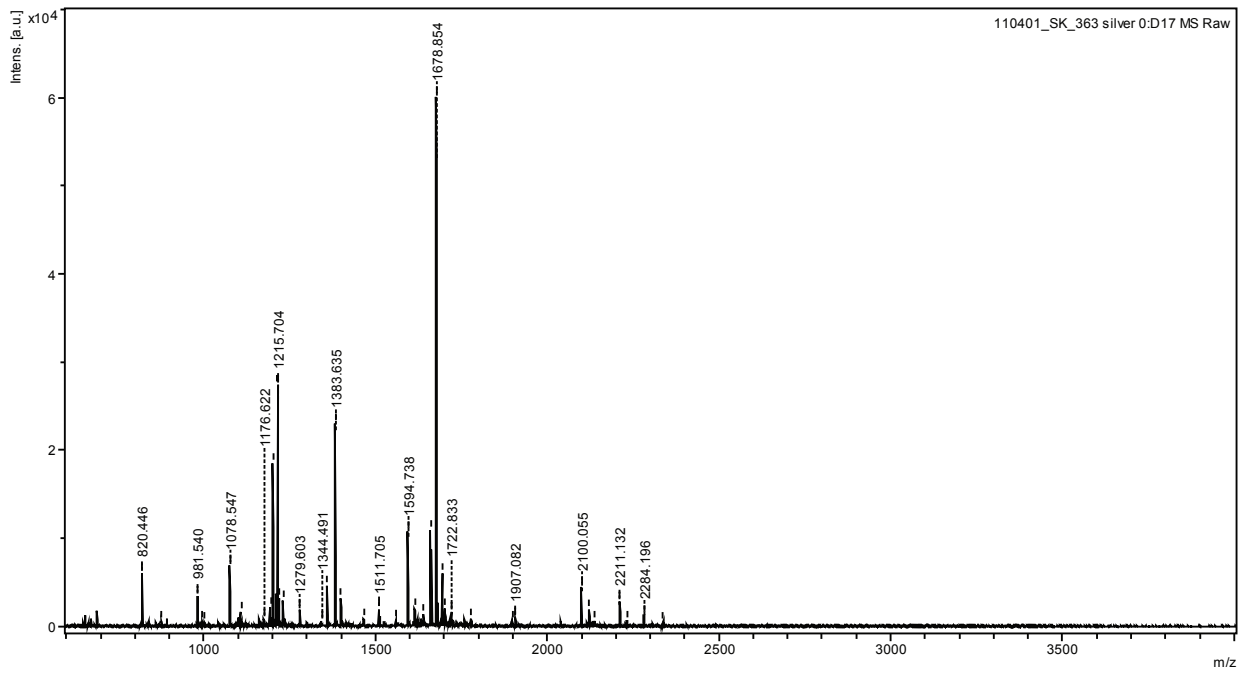

331

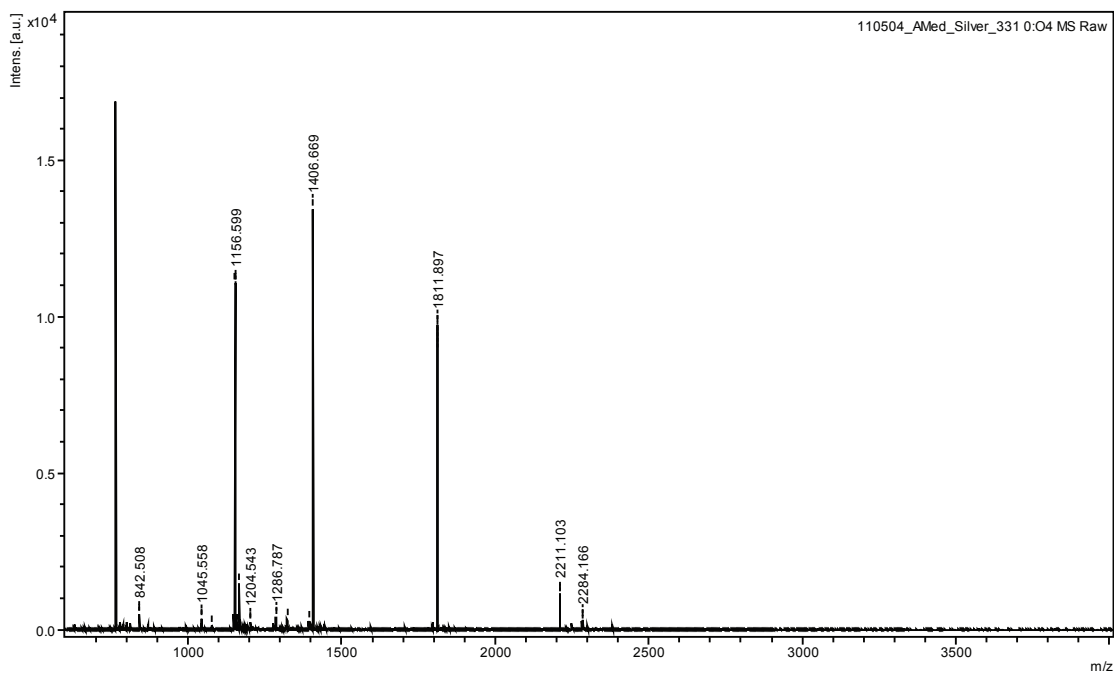



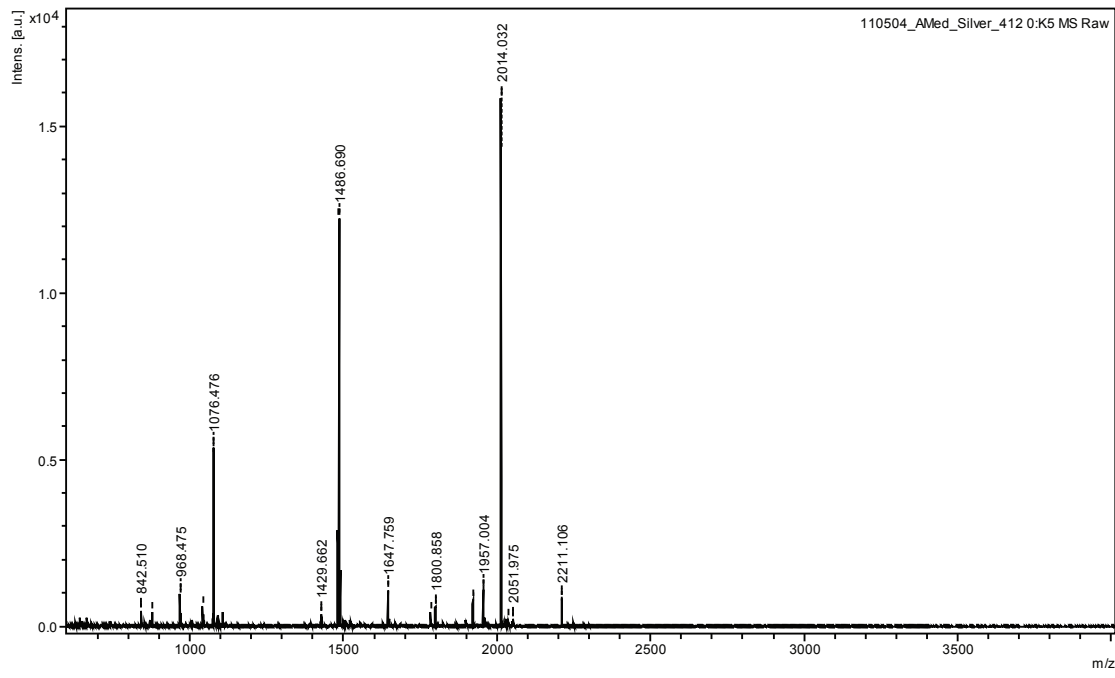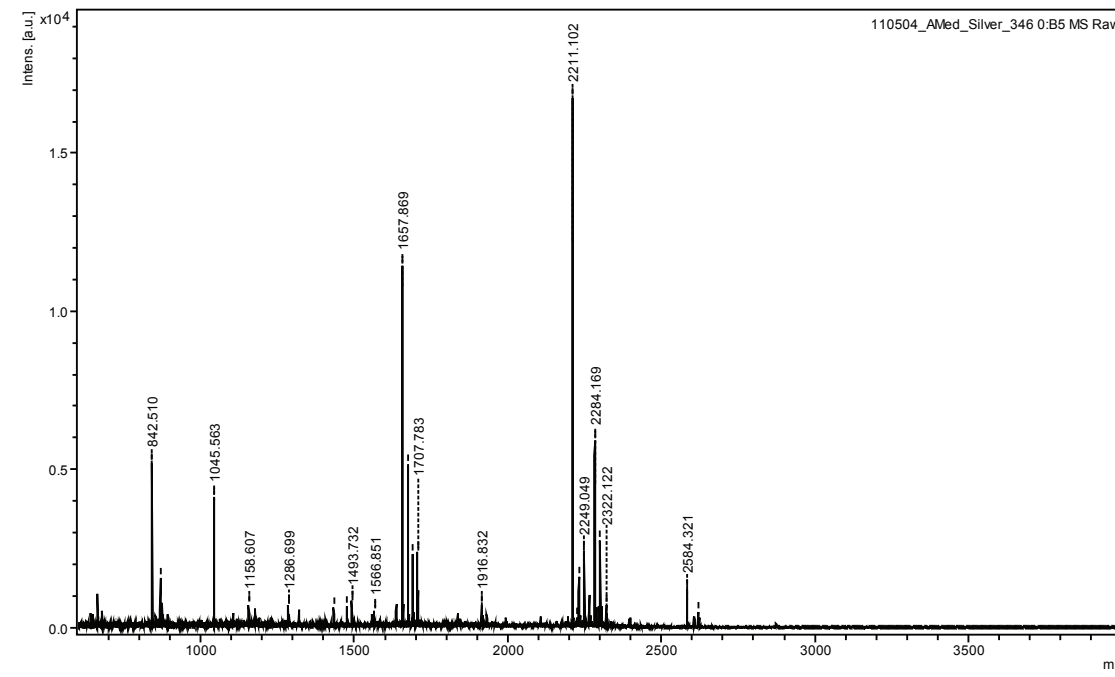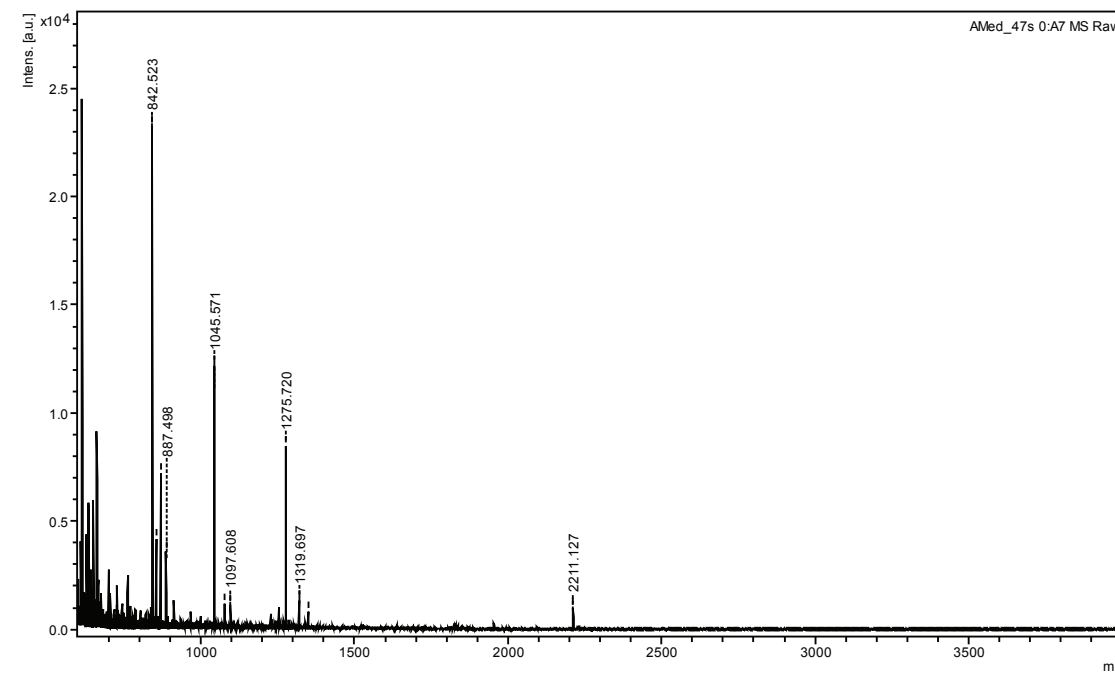

52

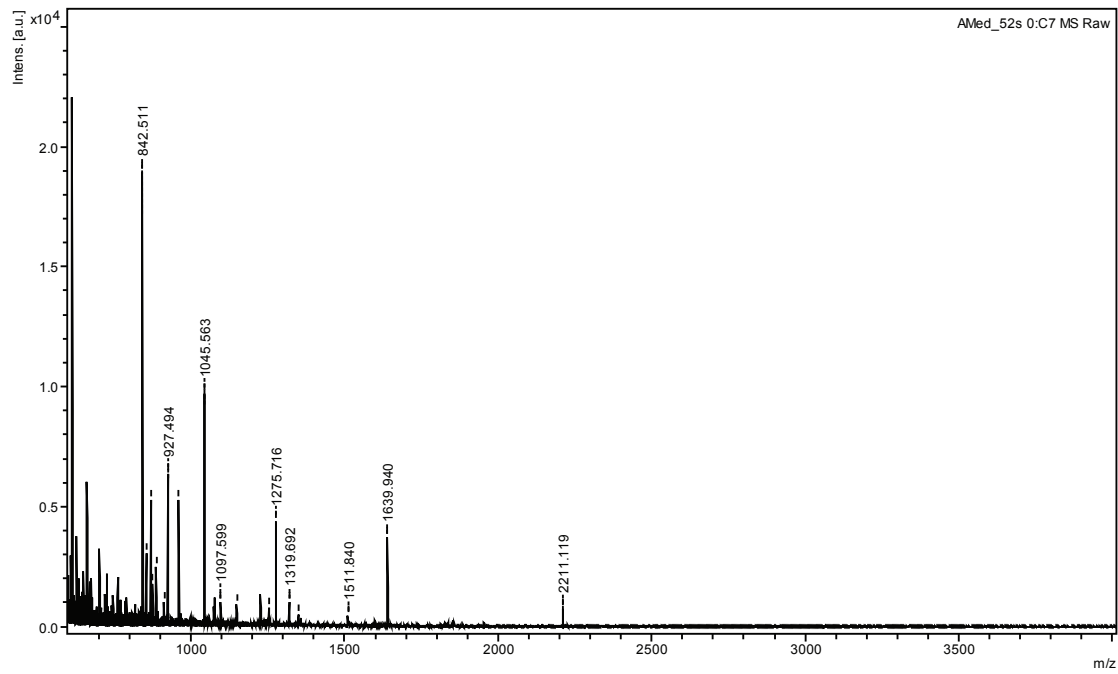

53

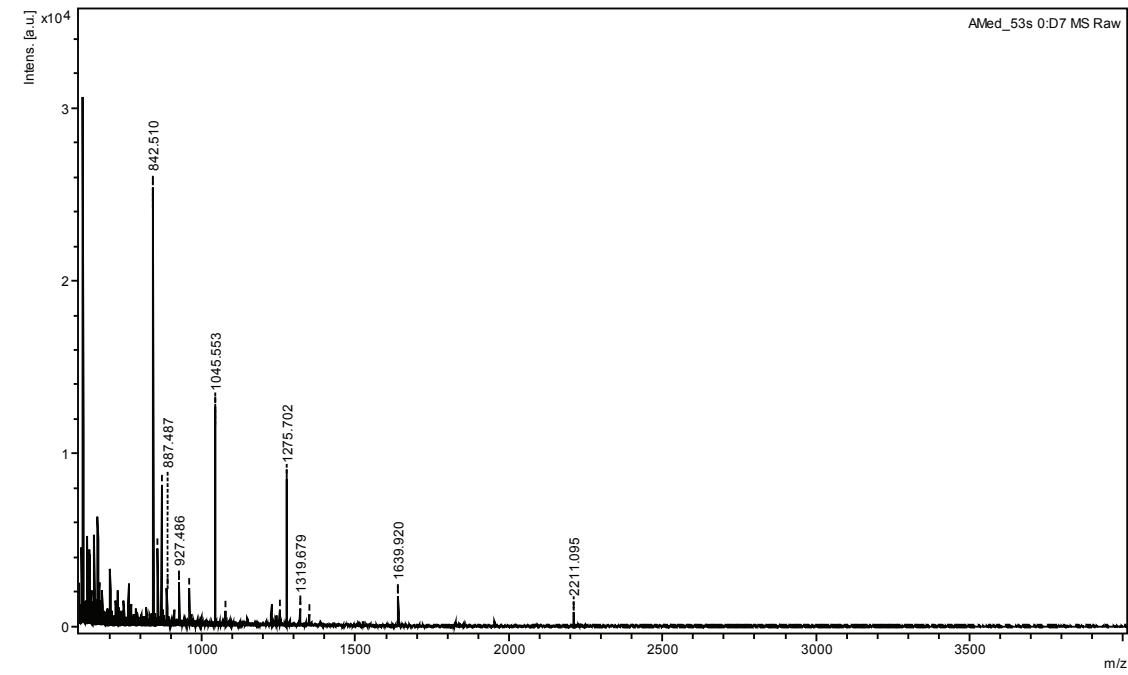

70

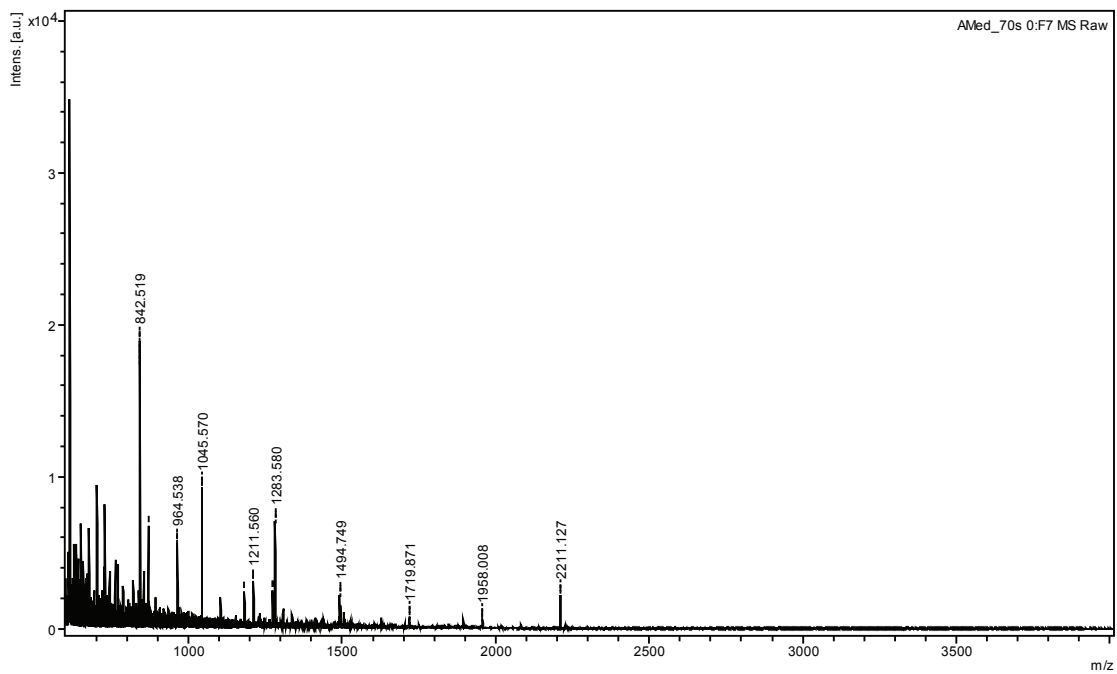

71

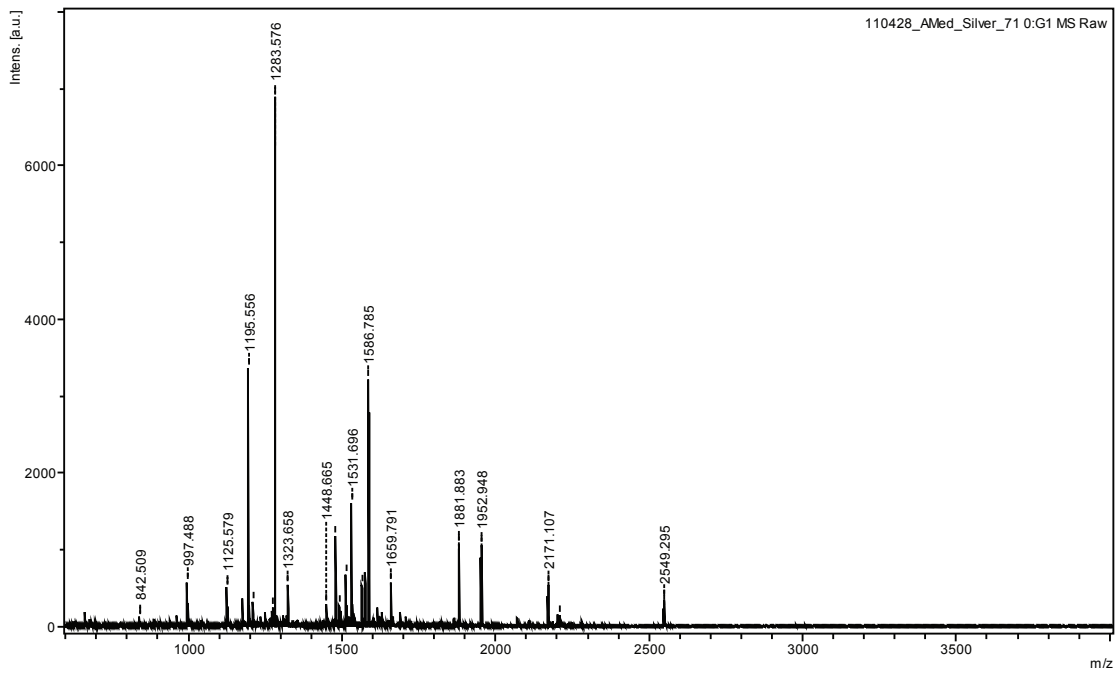

72

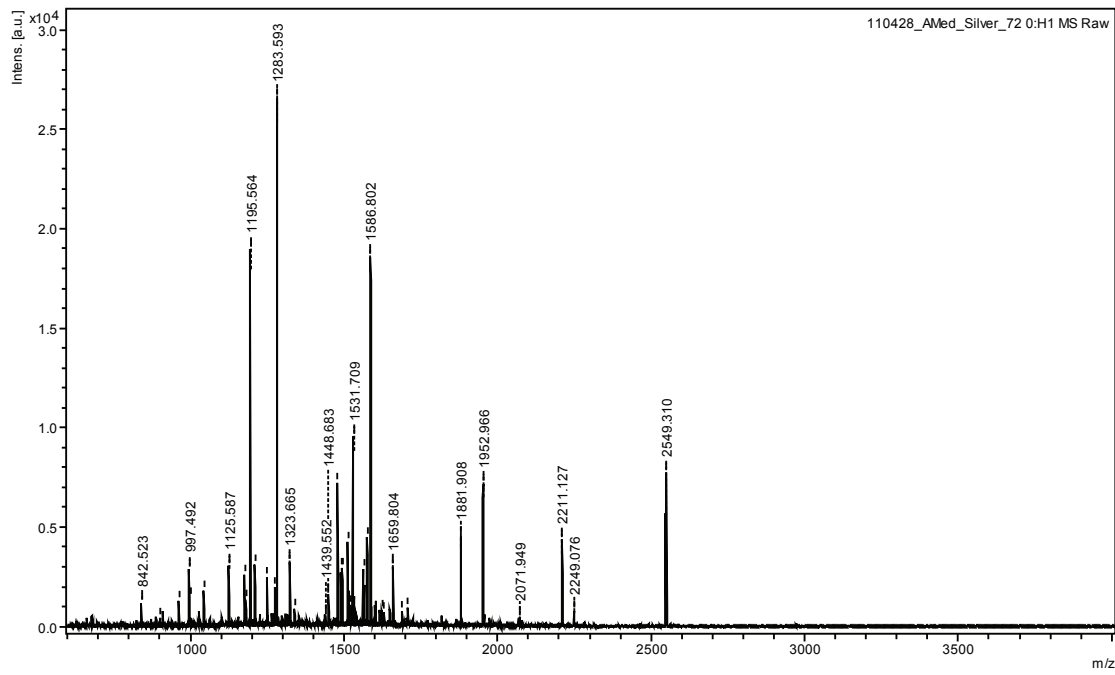

75

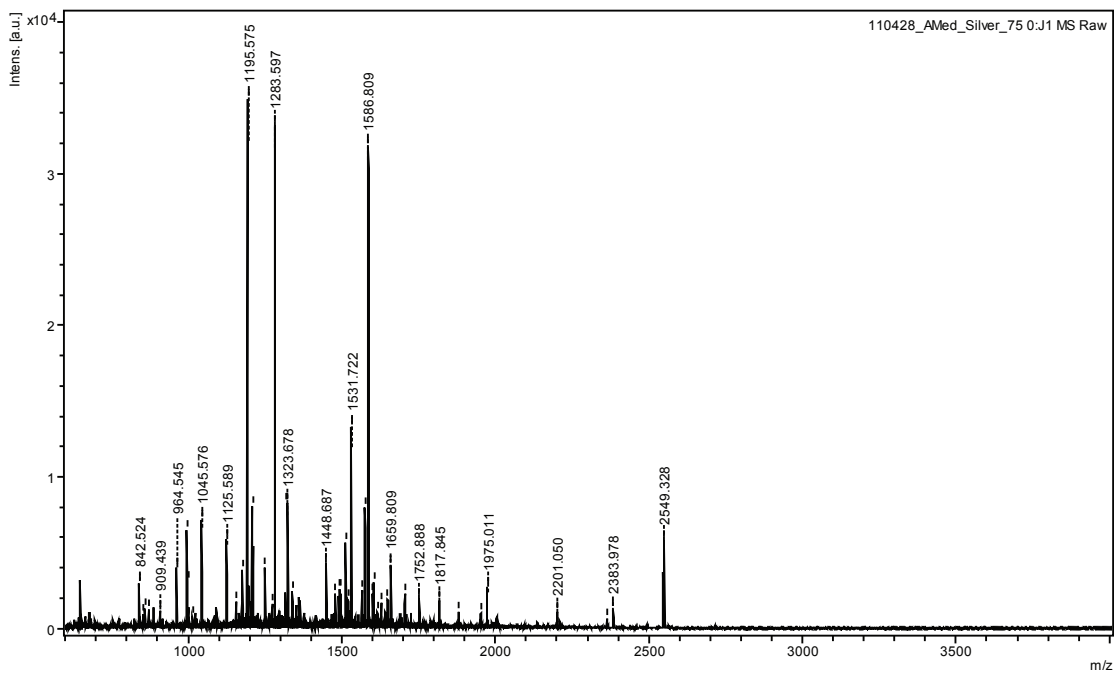

155

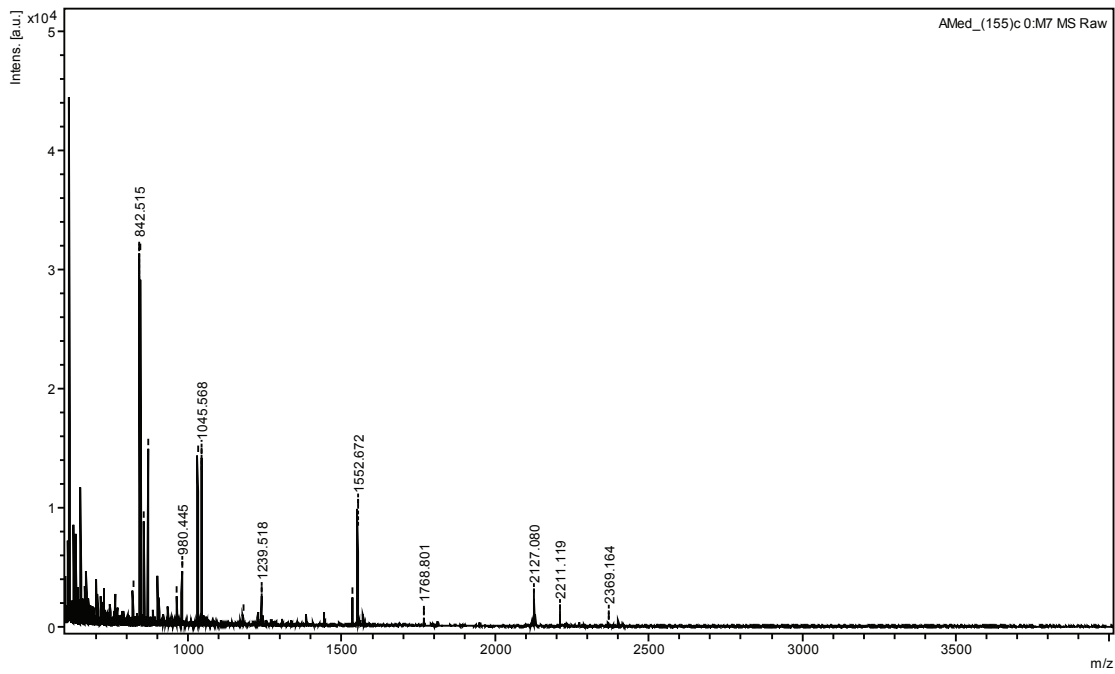

167

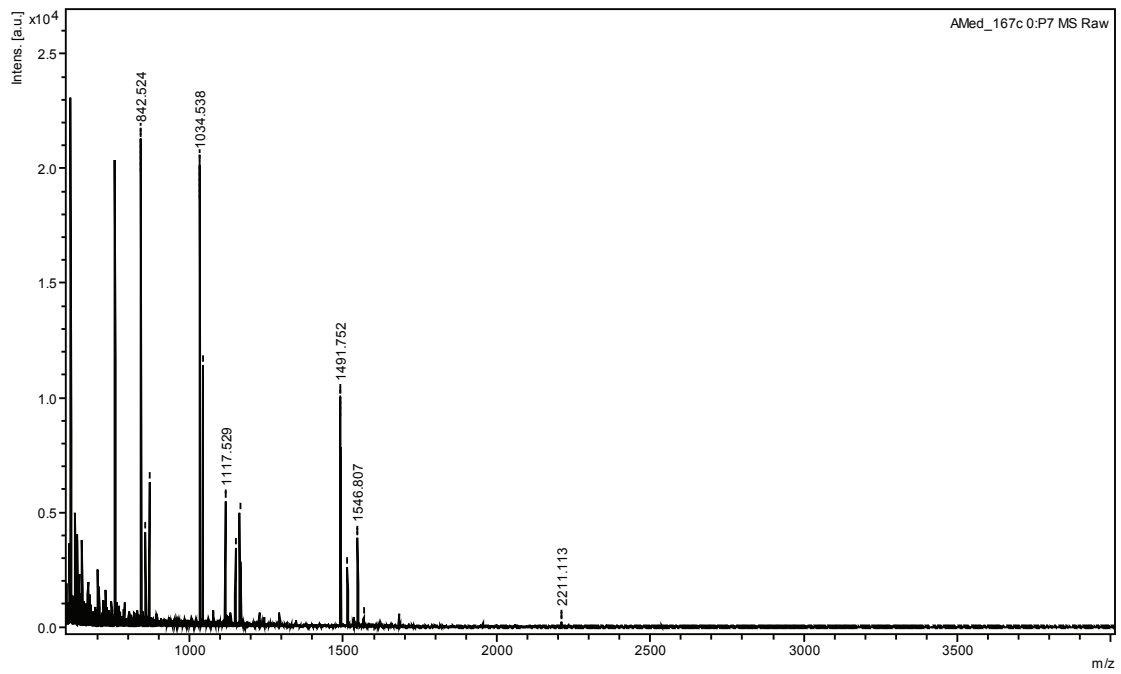

80

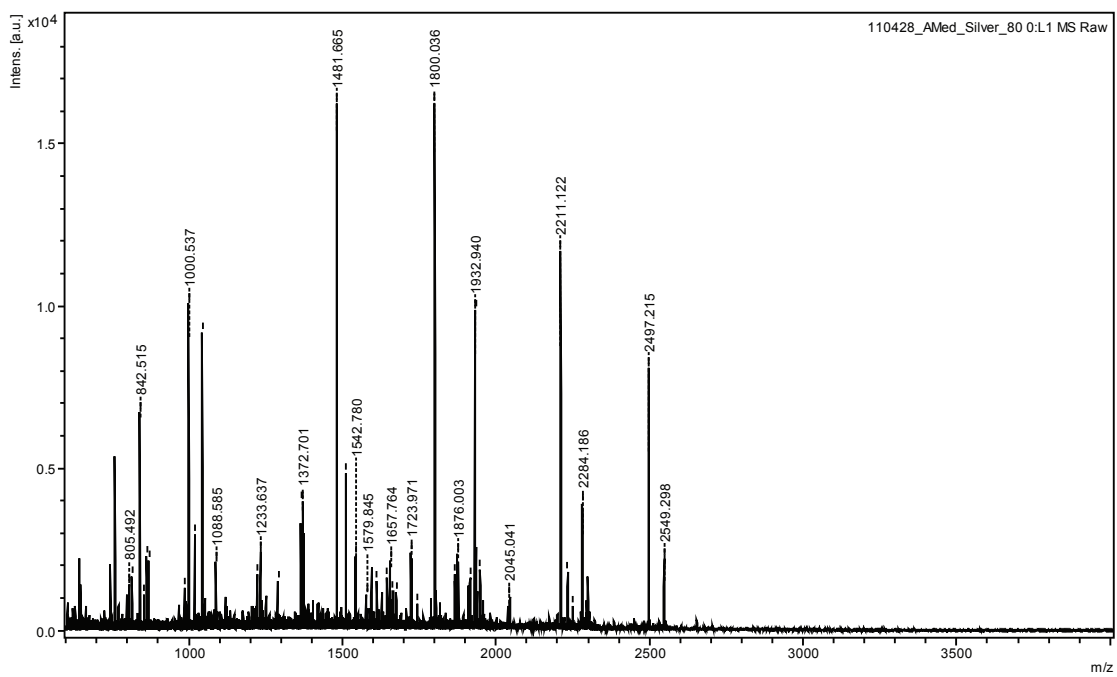

## 231\_233

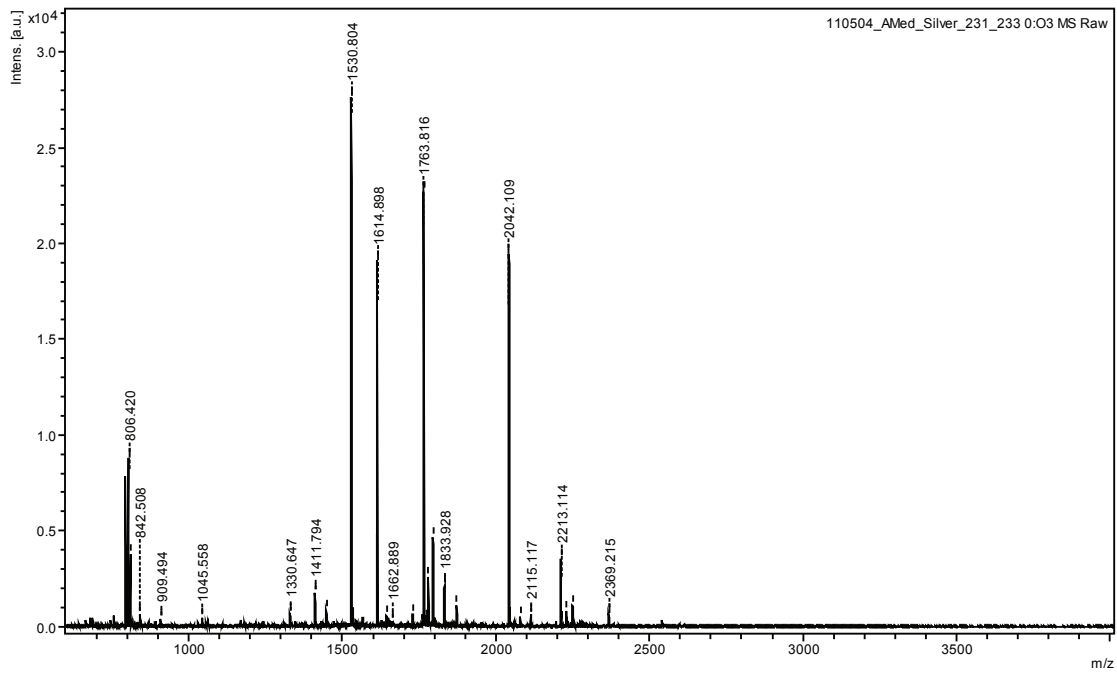

## 239

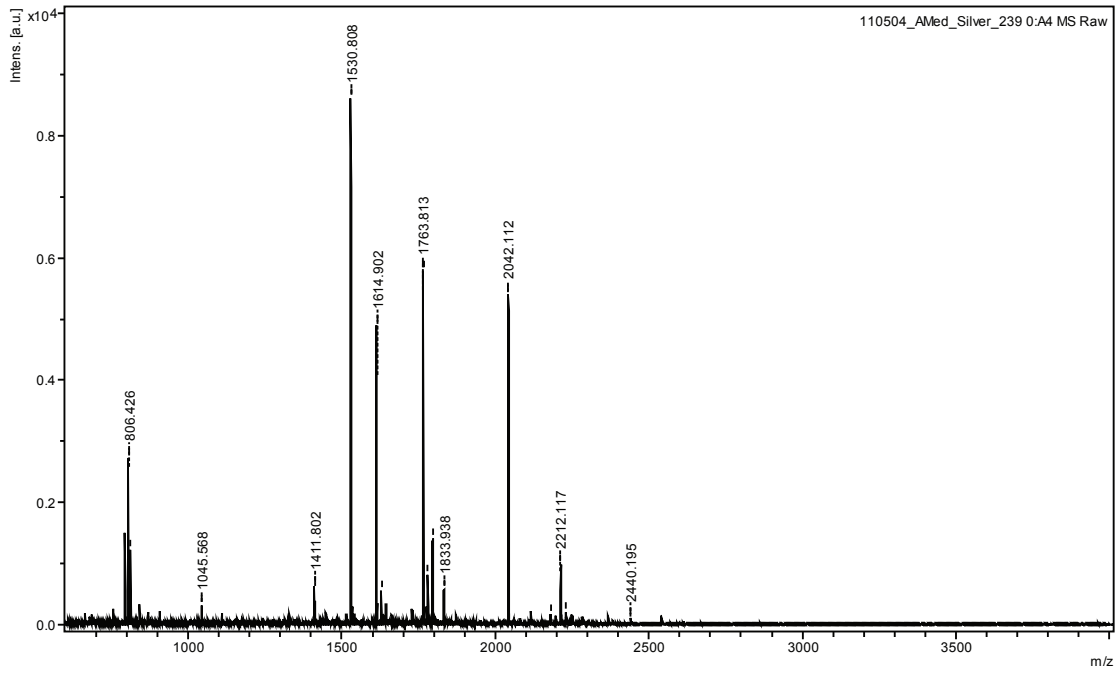

## 266

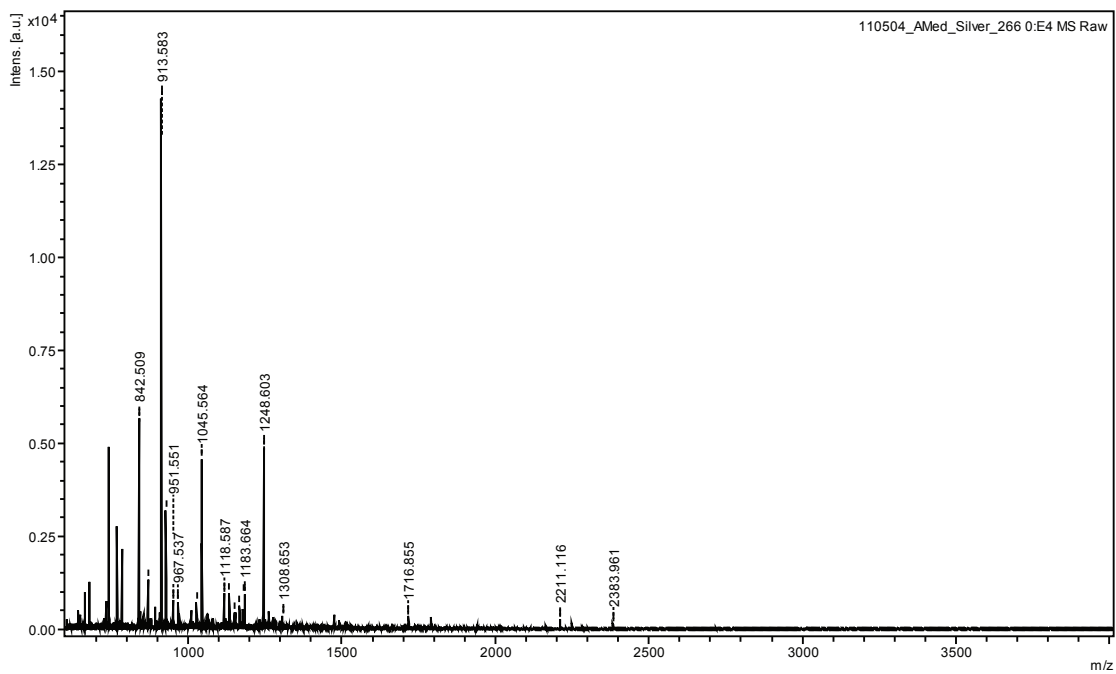

180

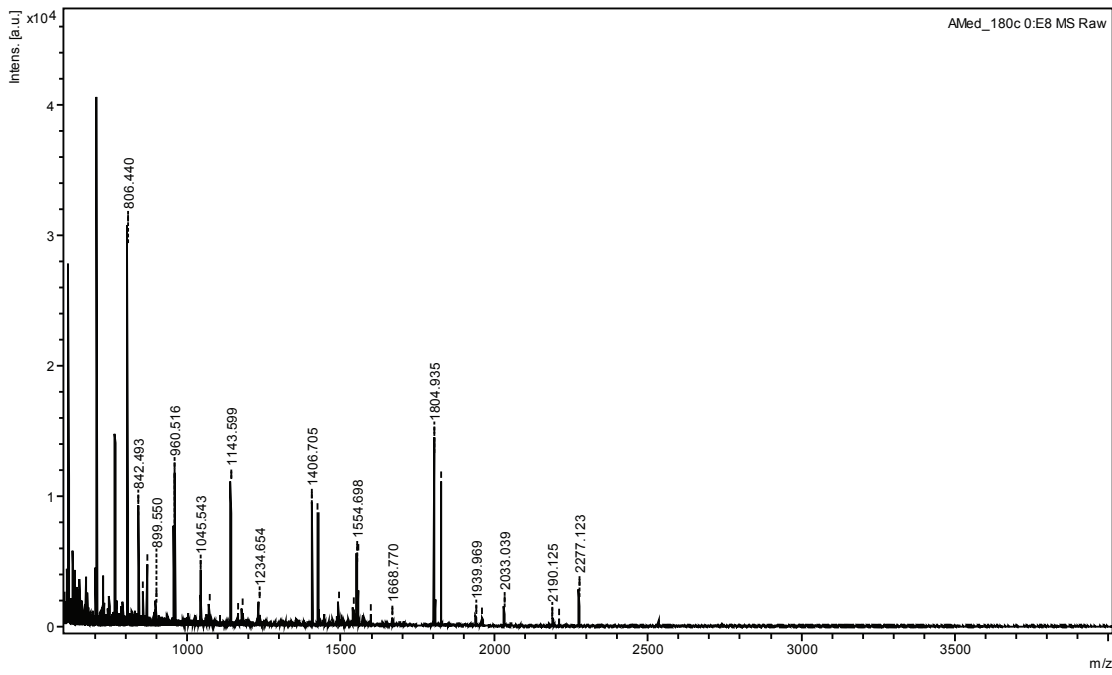

182

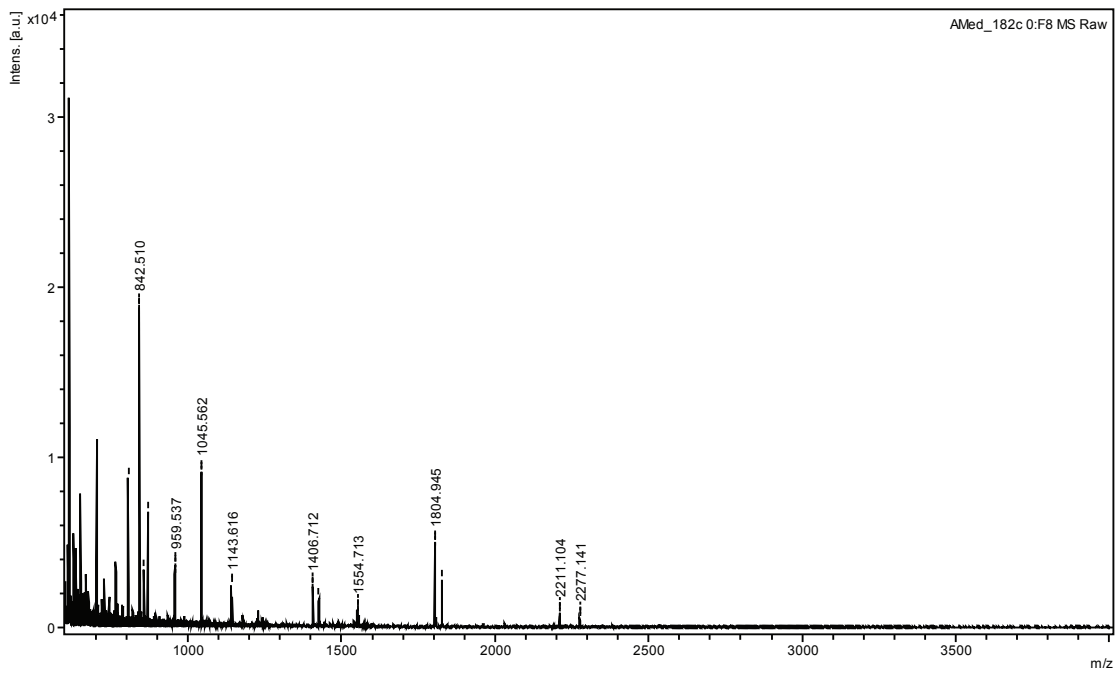

185

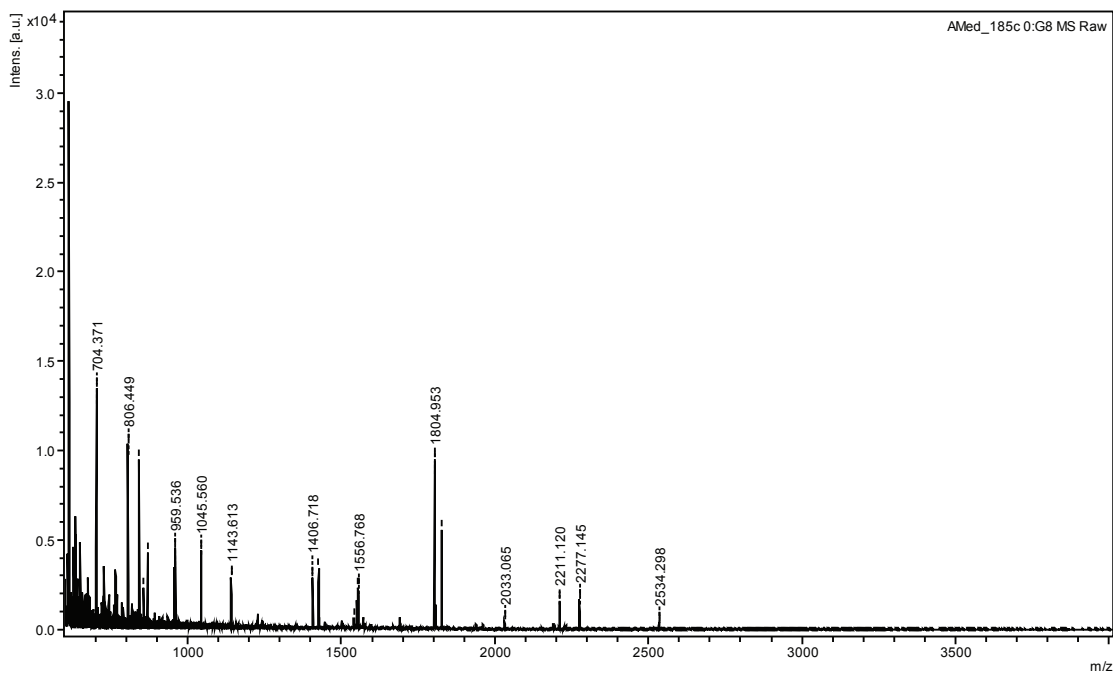

76

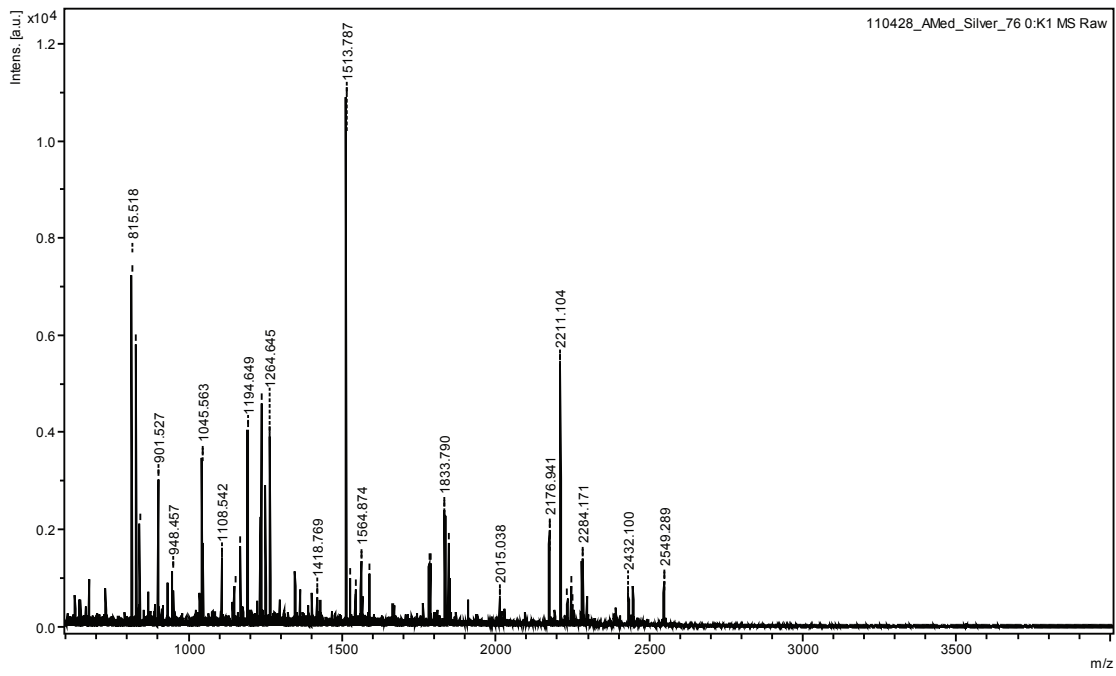

316

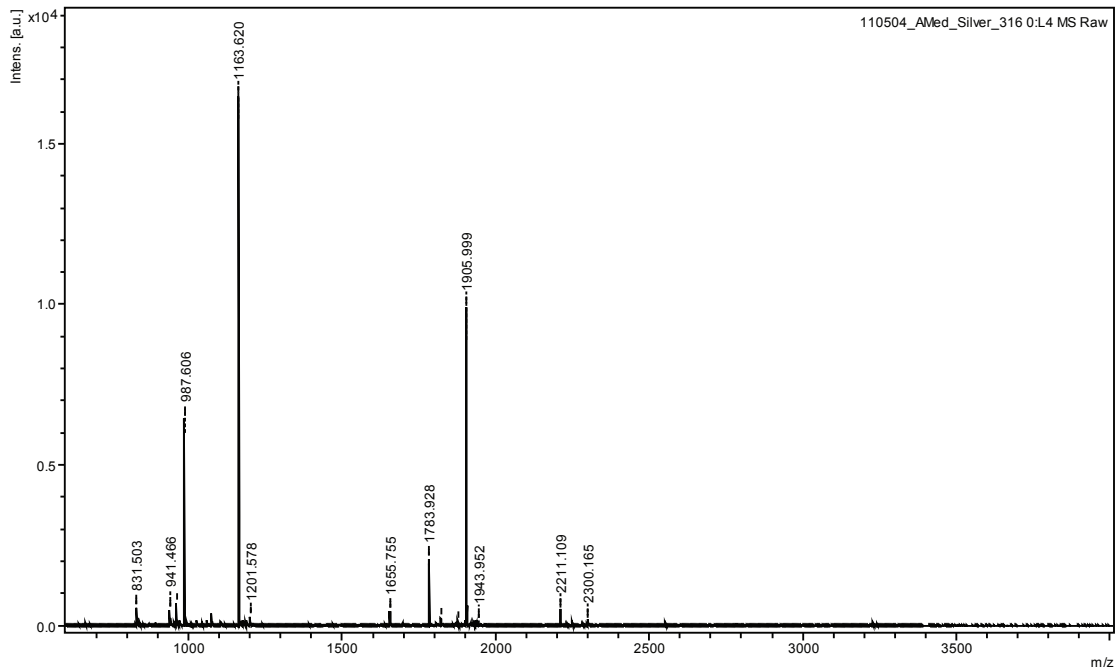

360

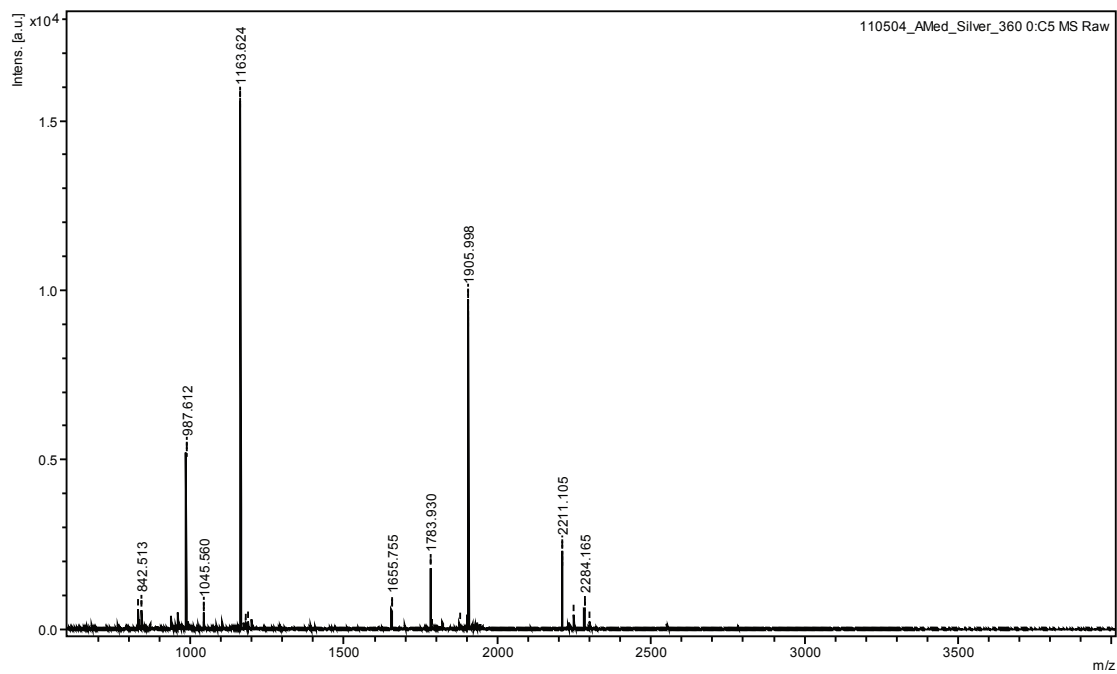

243

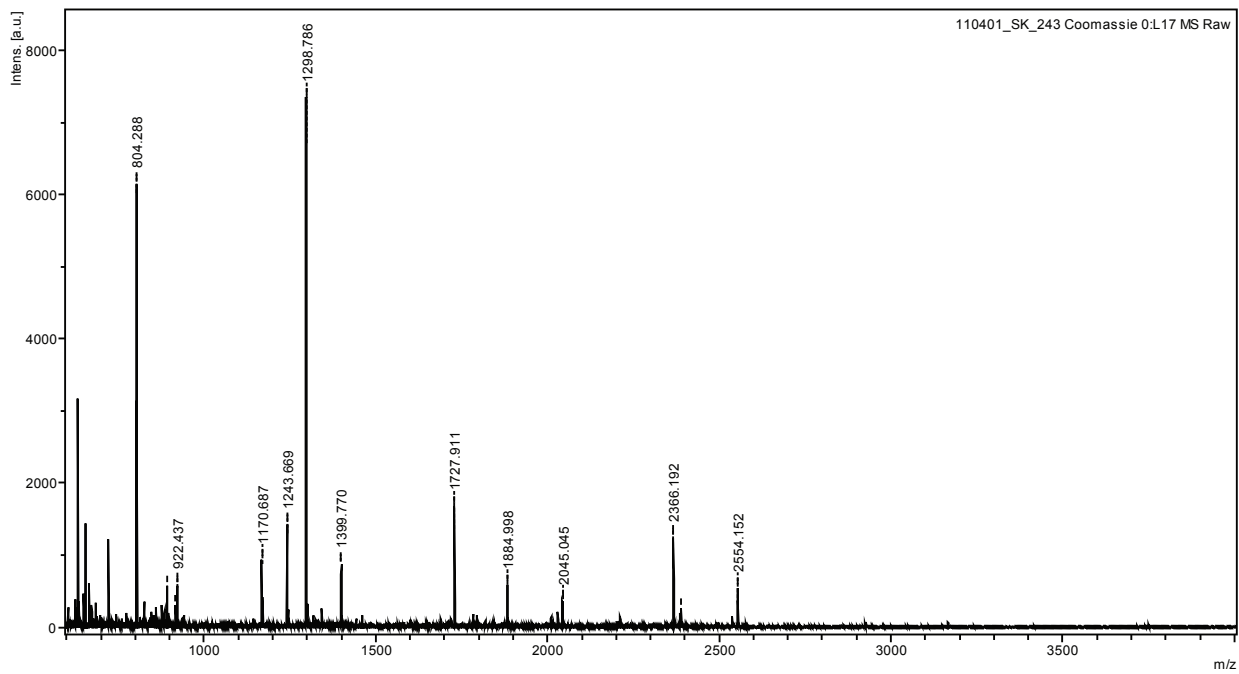

248

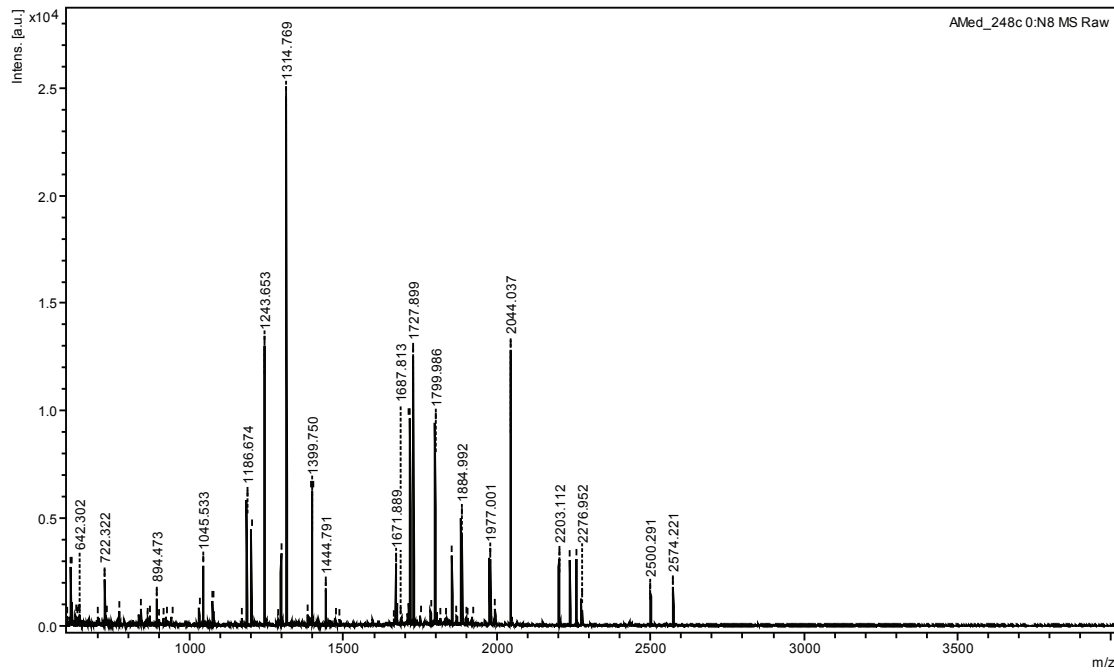

280

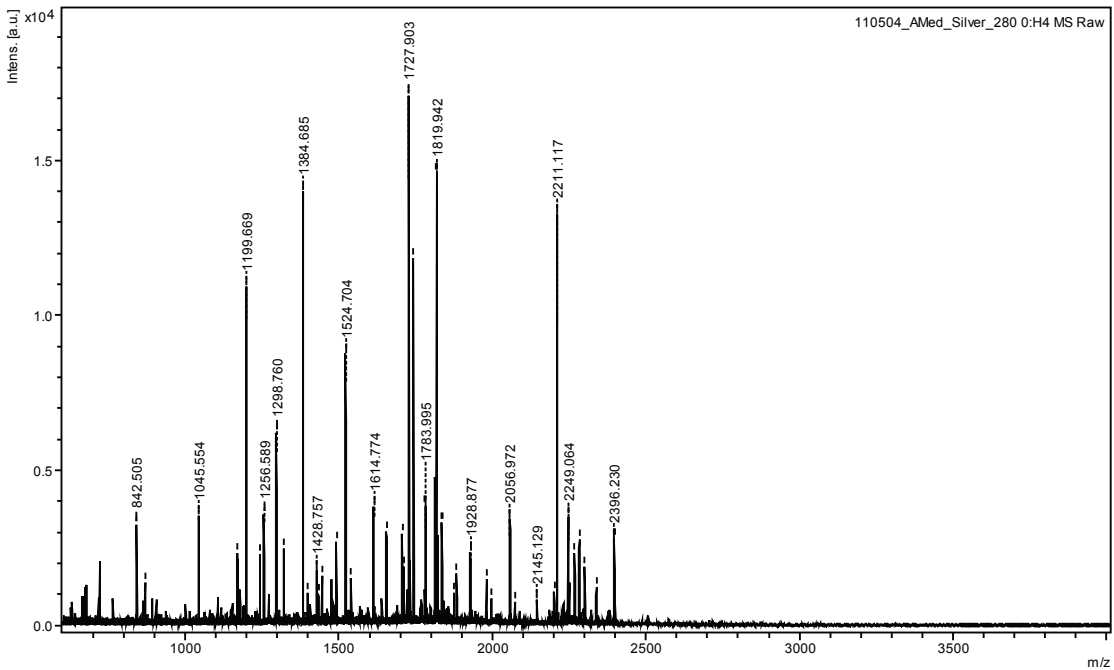



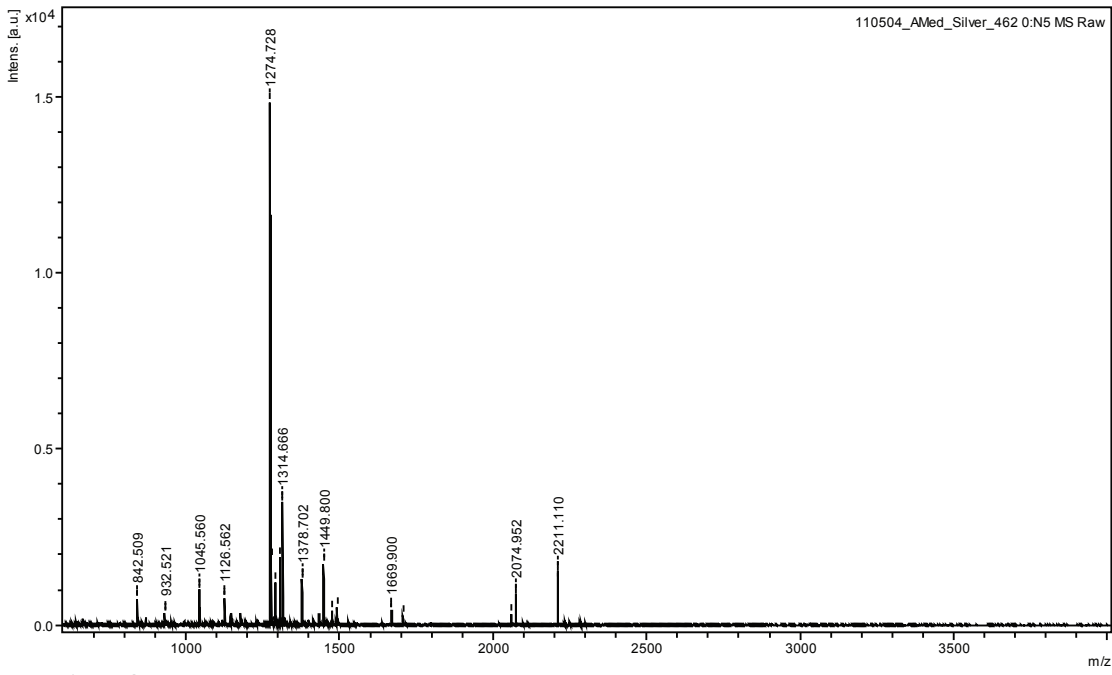

465\_484

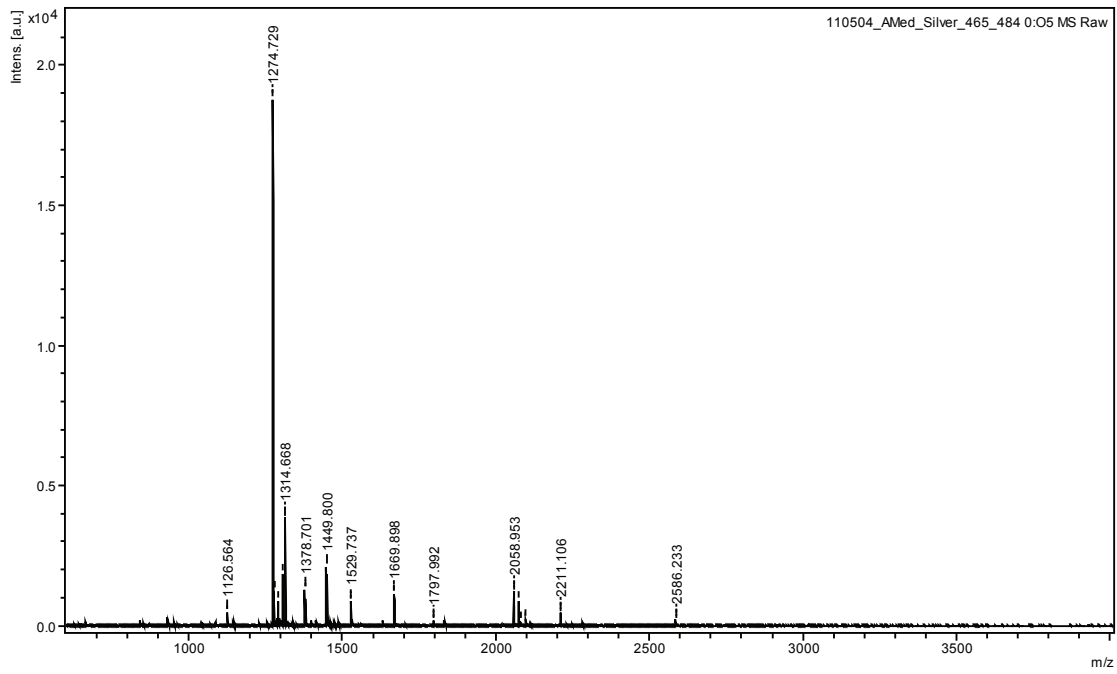

468

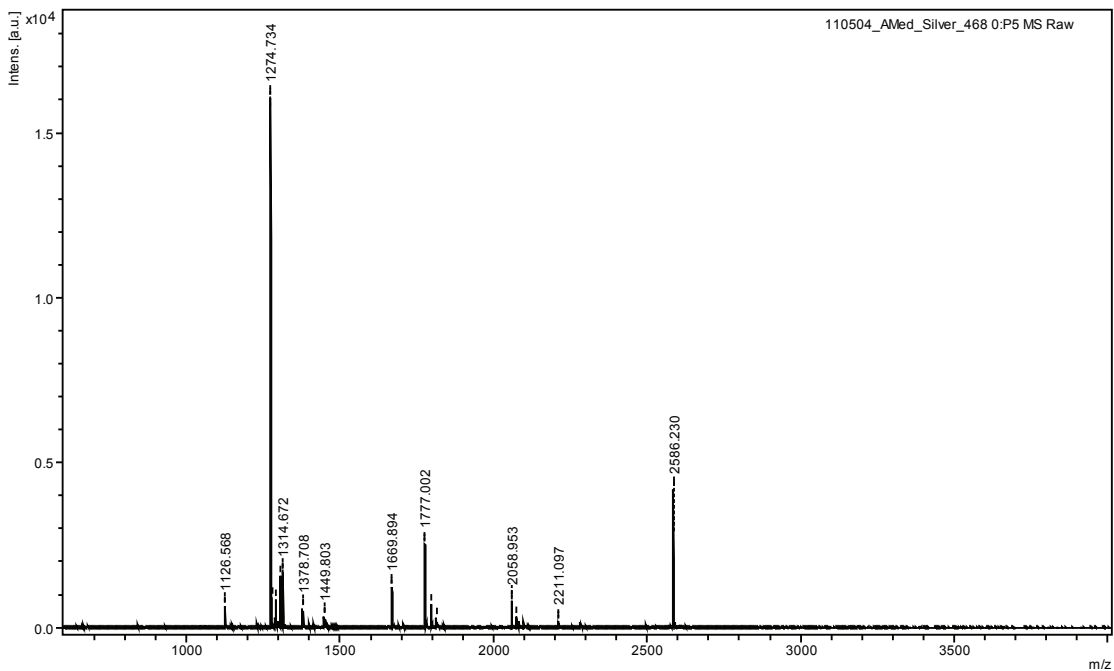

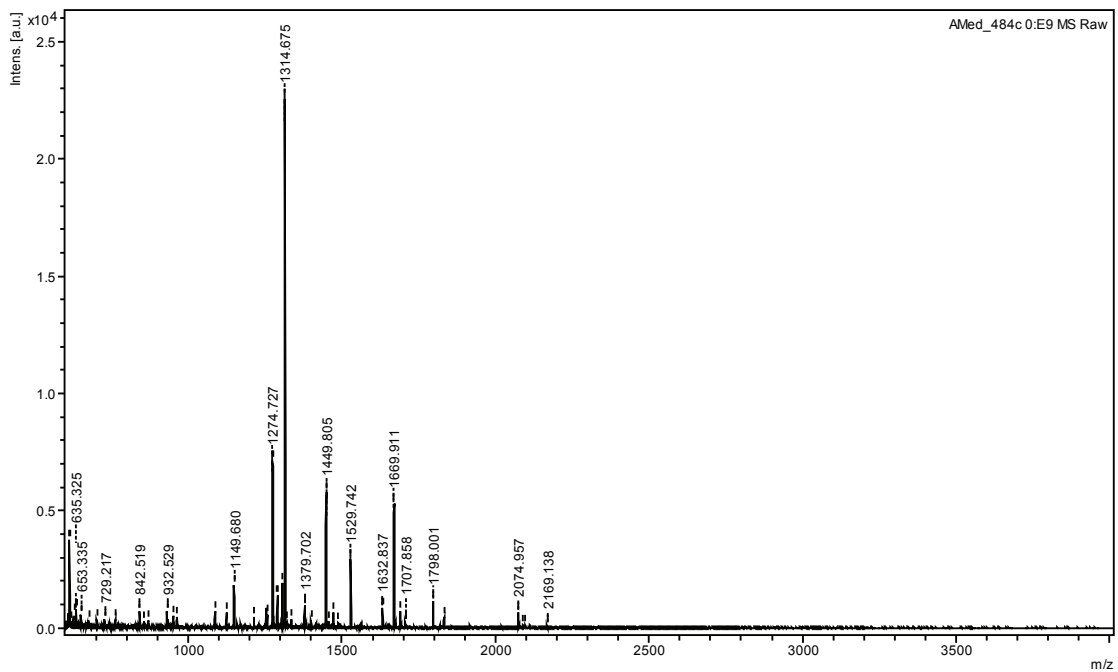

492

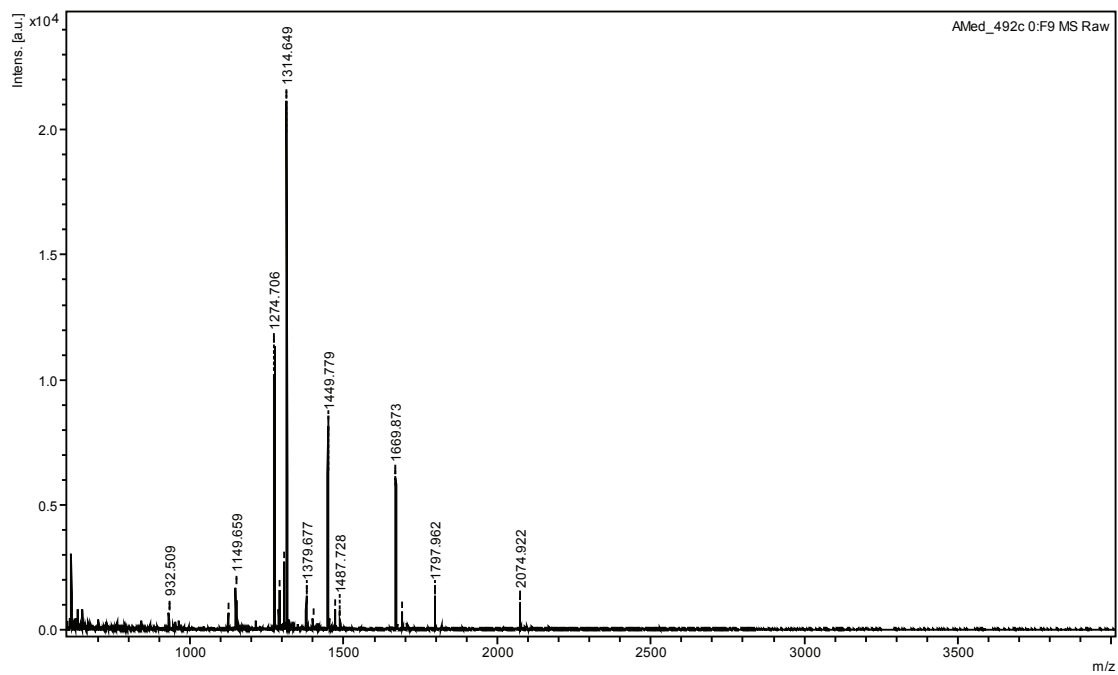

747

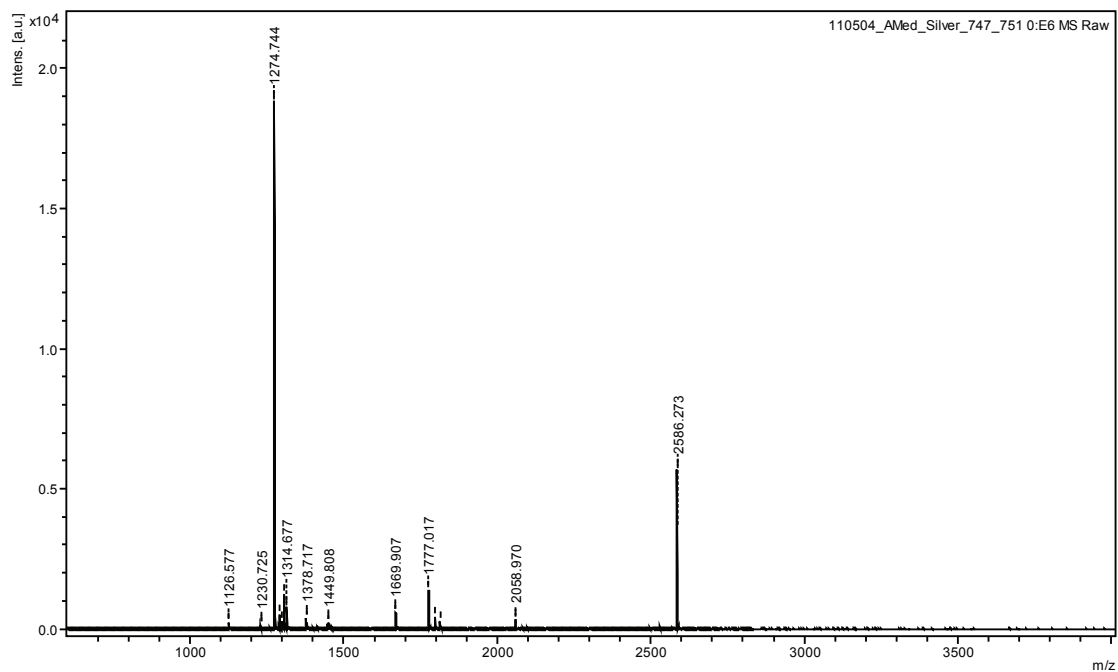

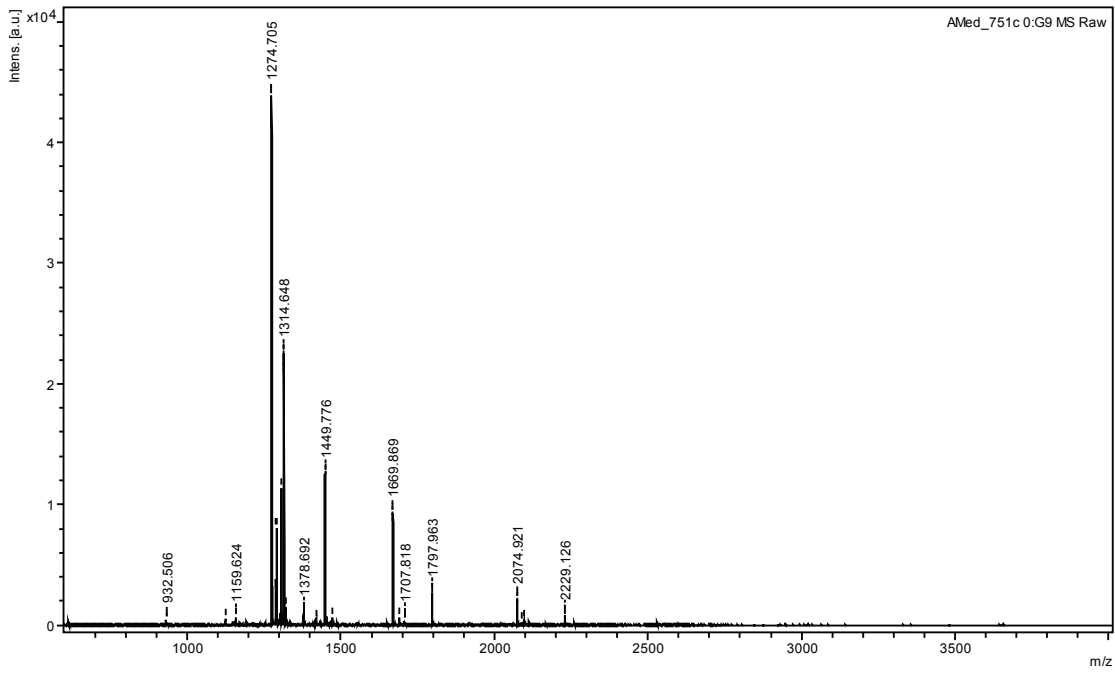

480

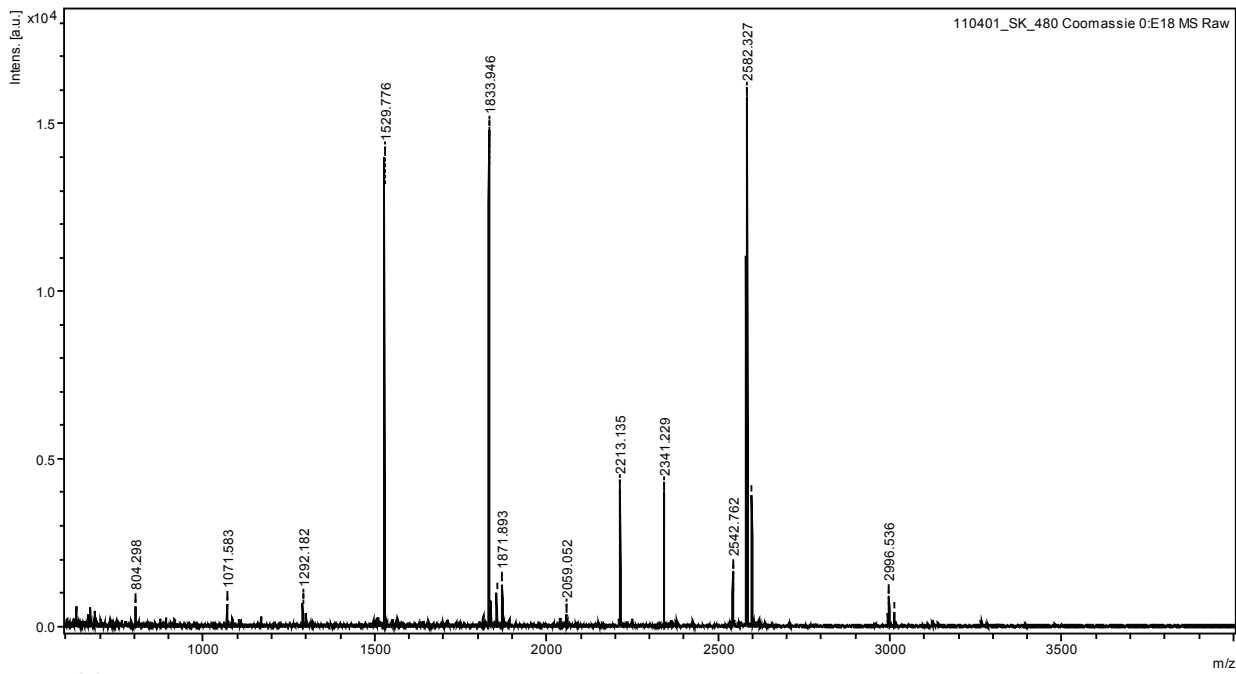

488

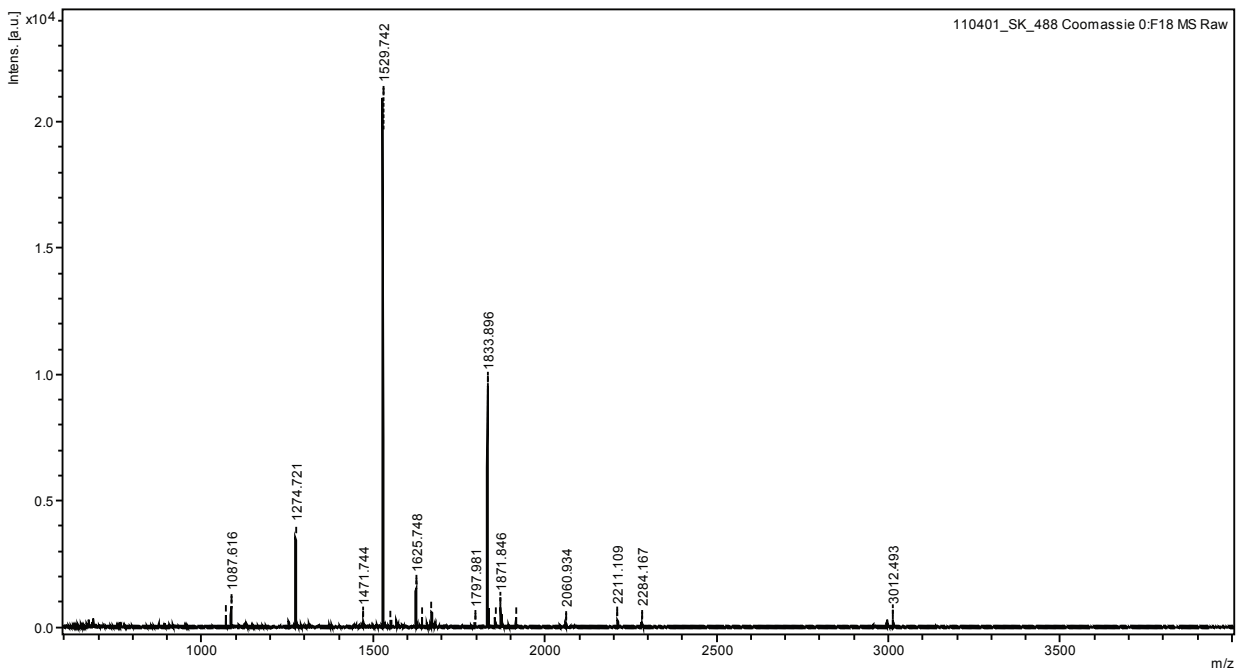

117

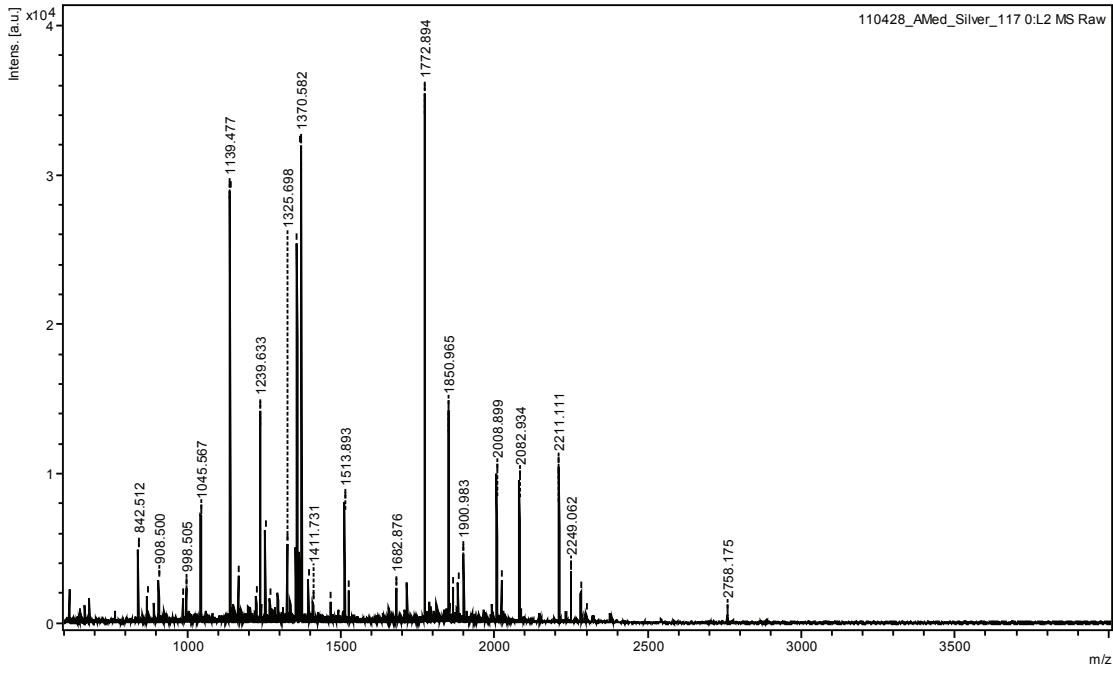

122

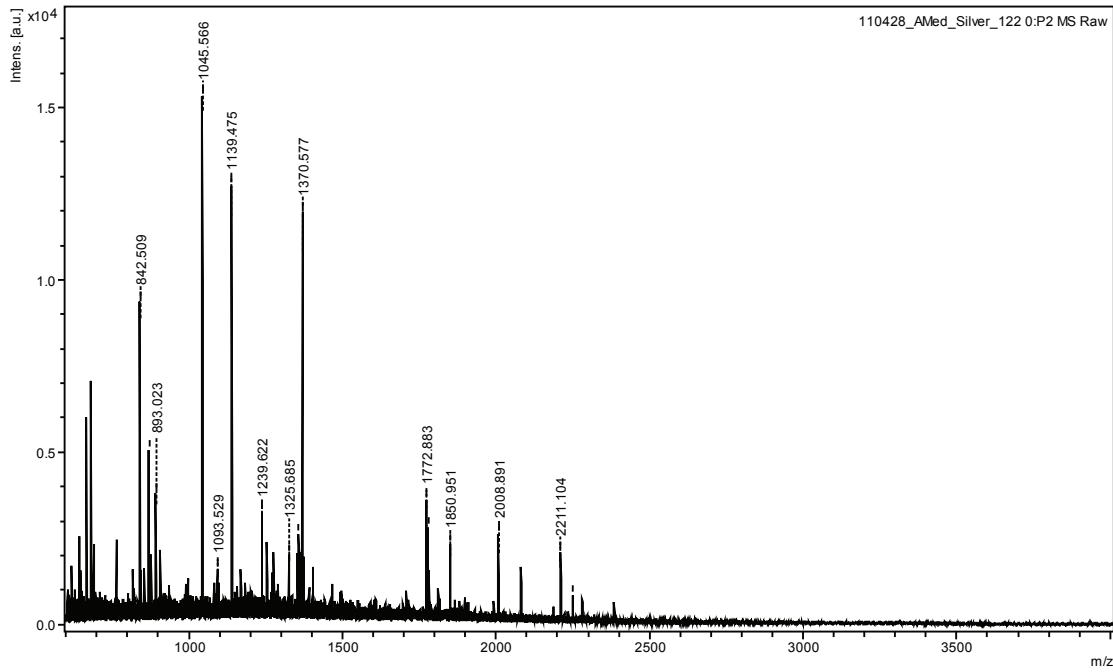

322

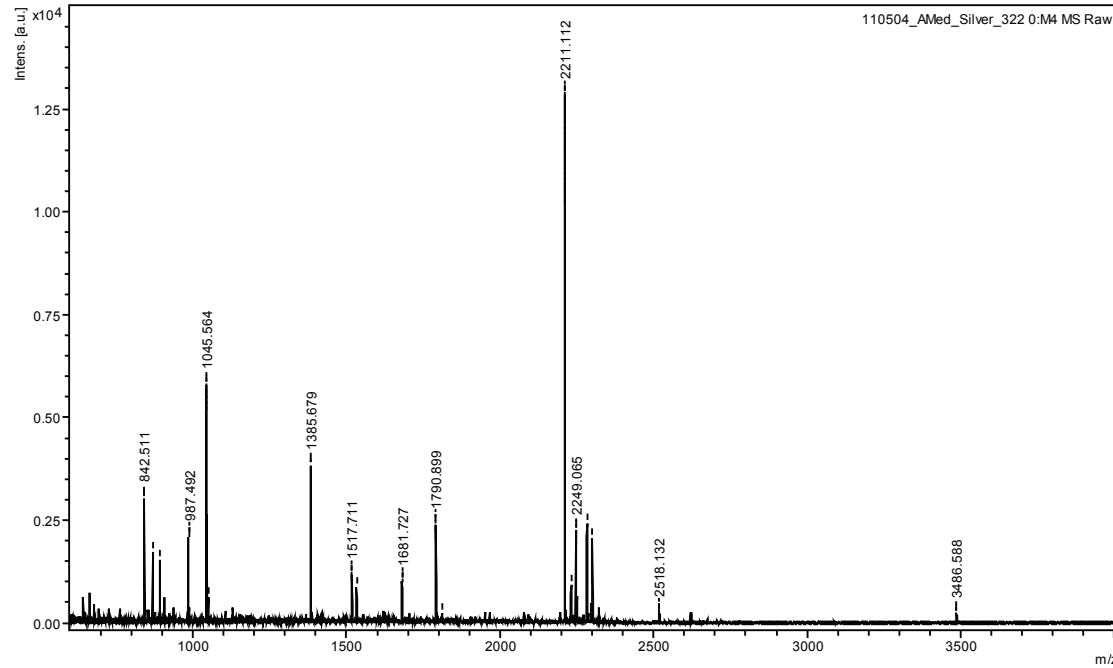

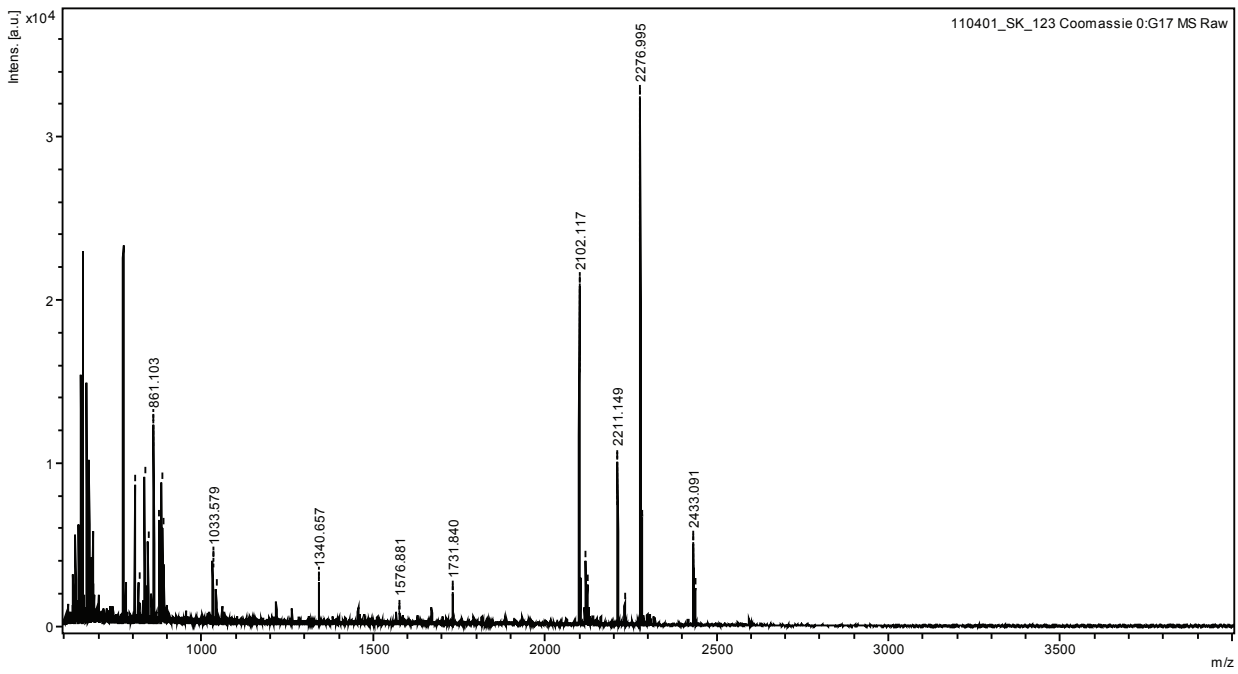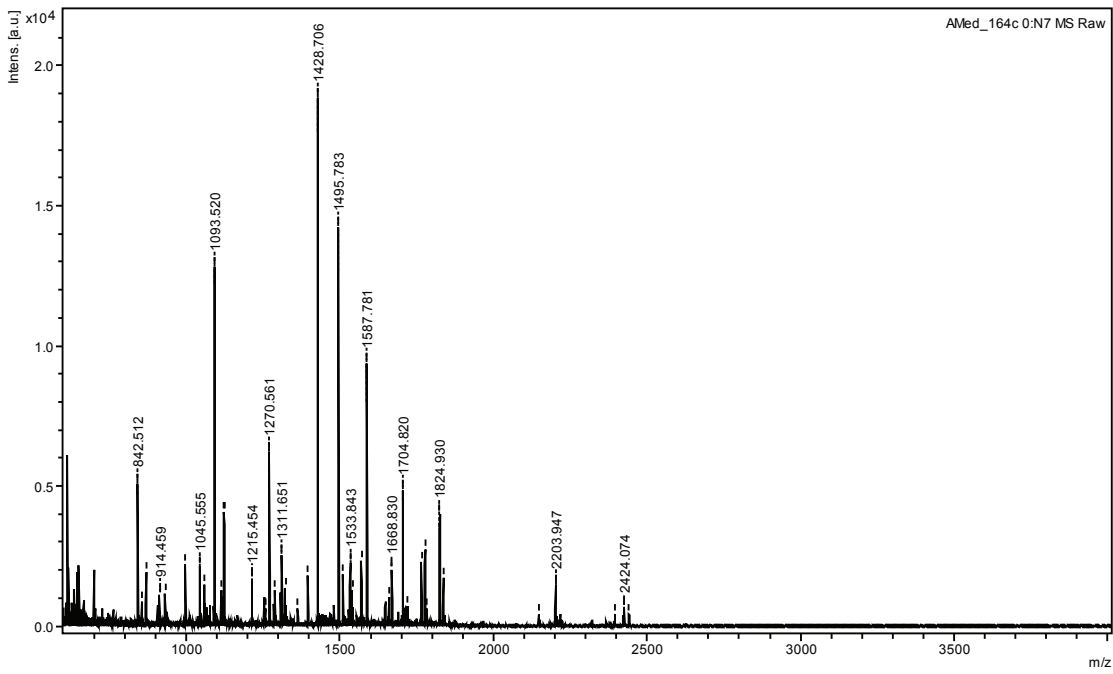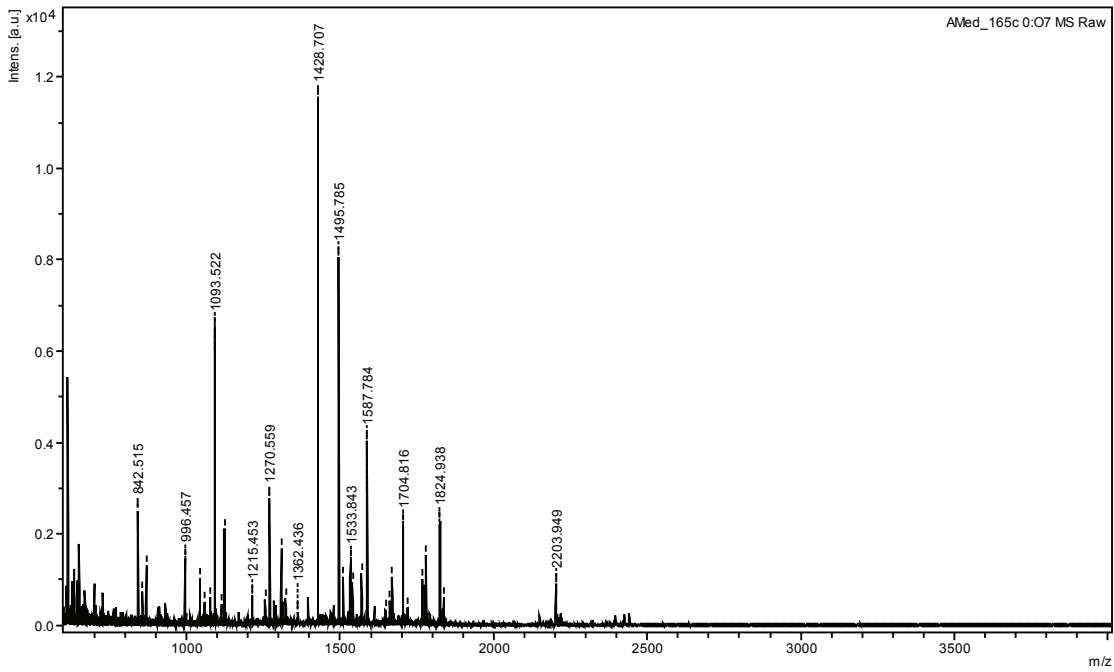

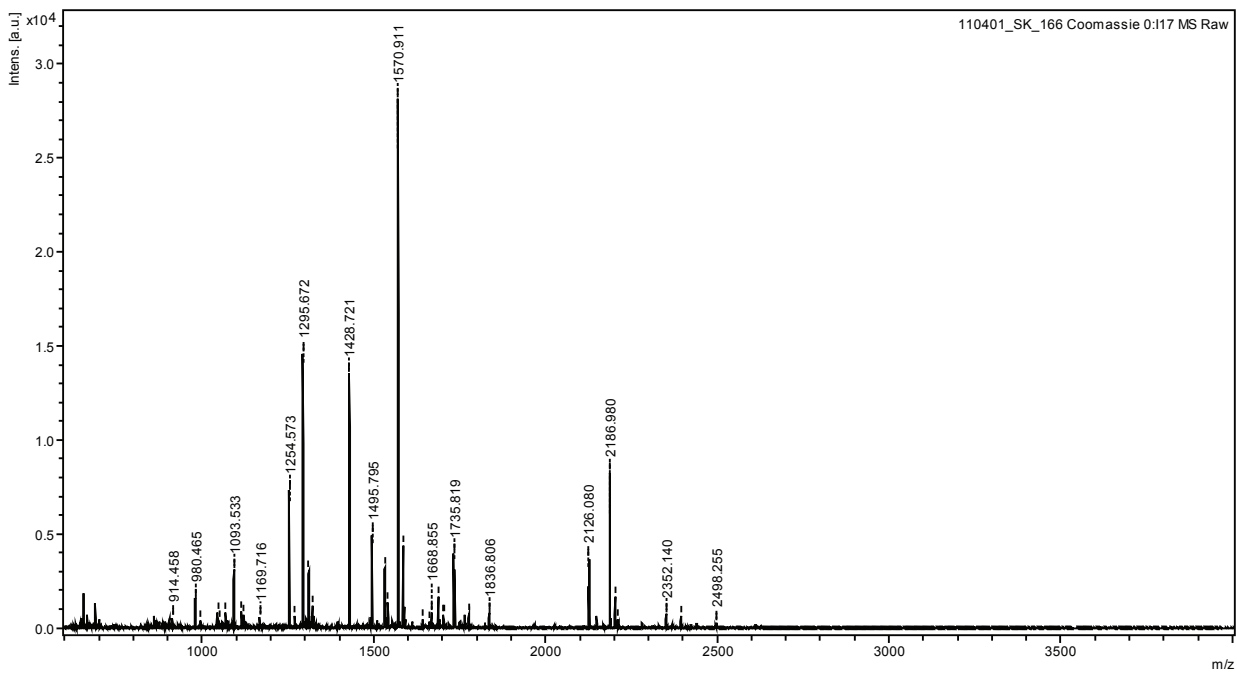

170

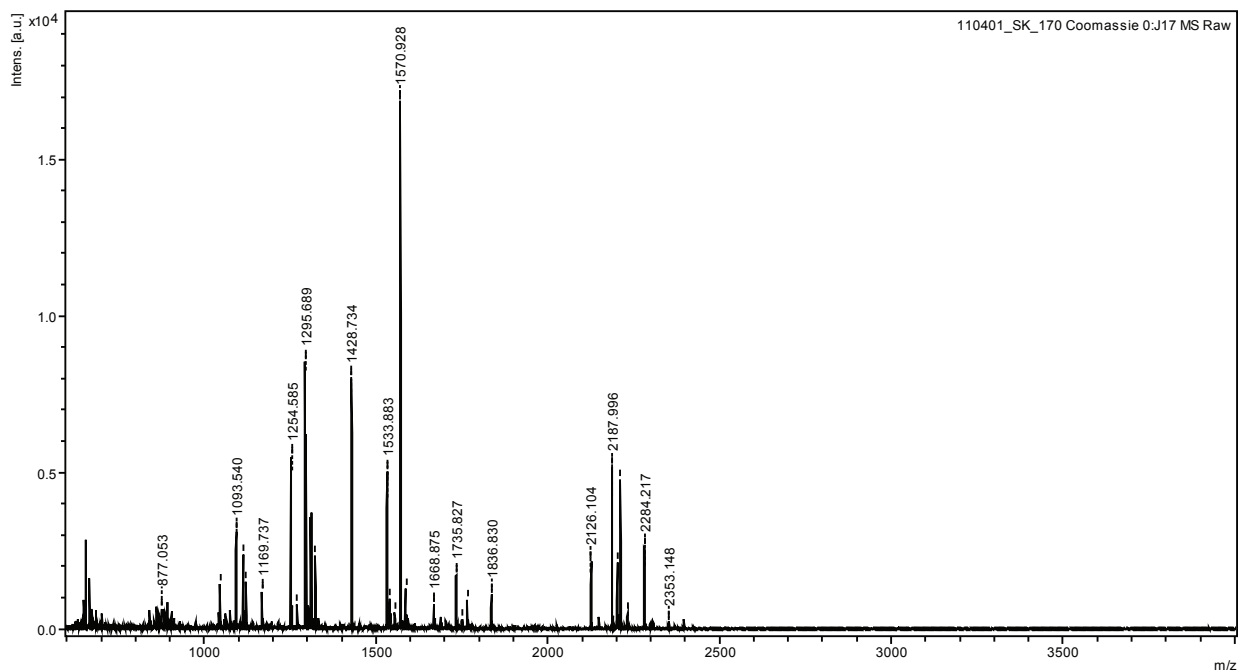

171

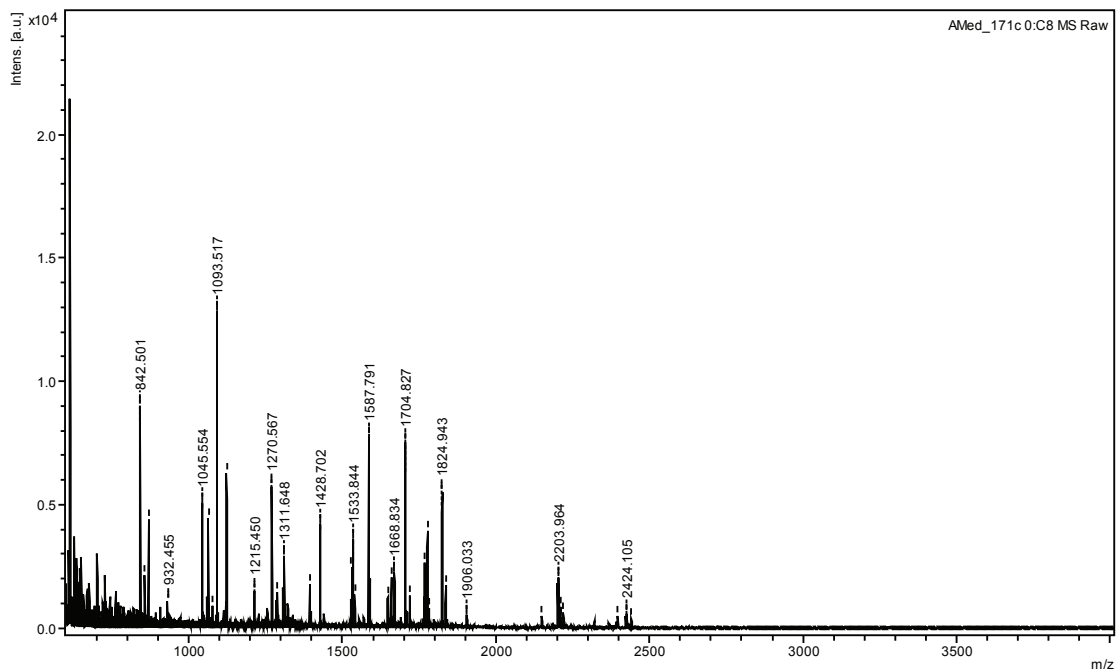

175

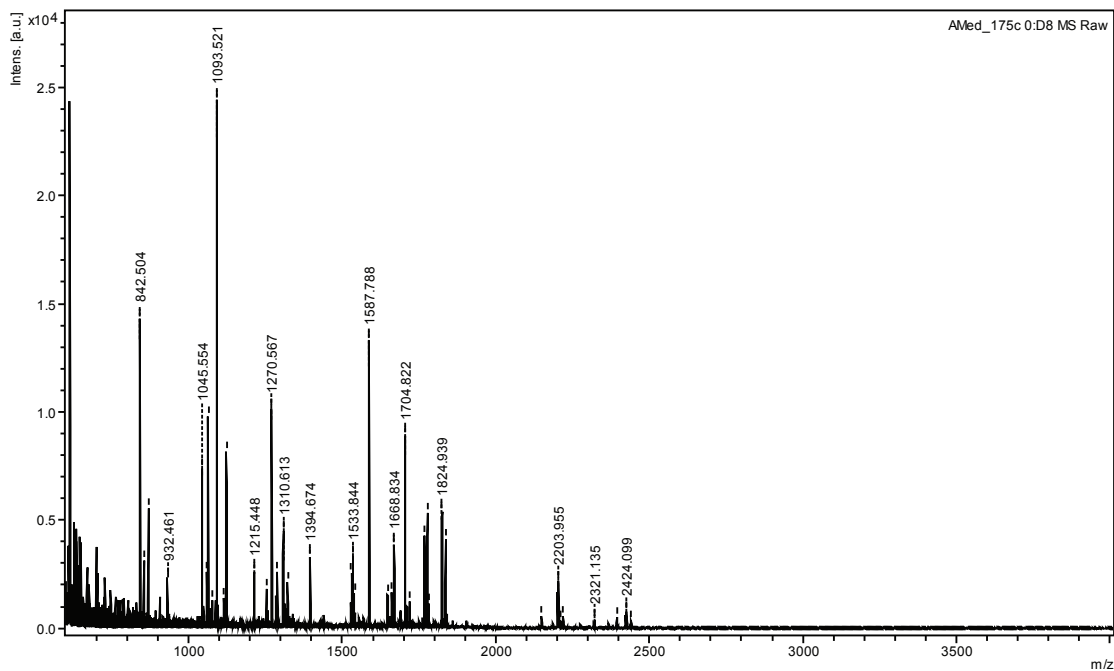

193

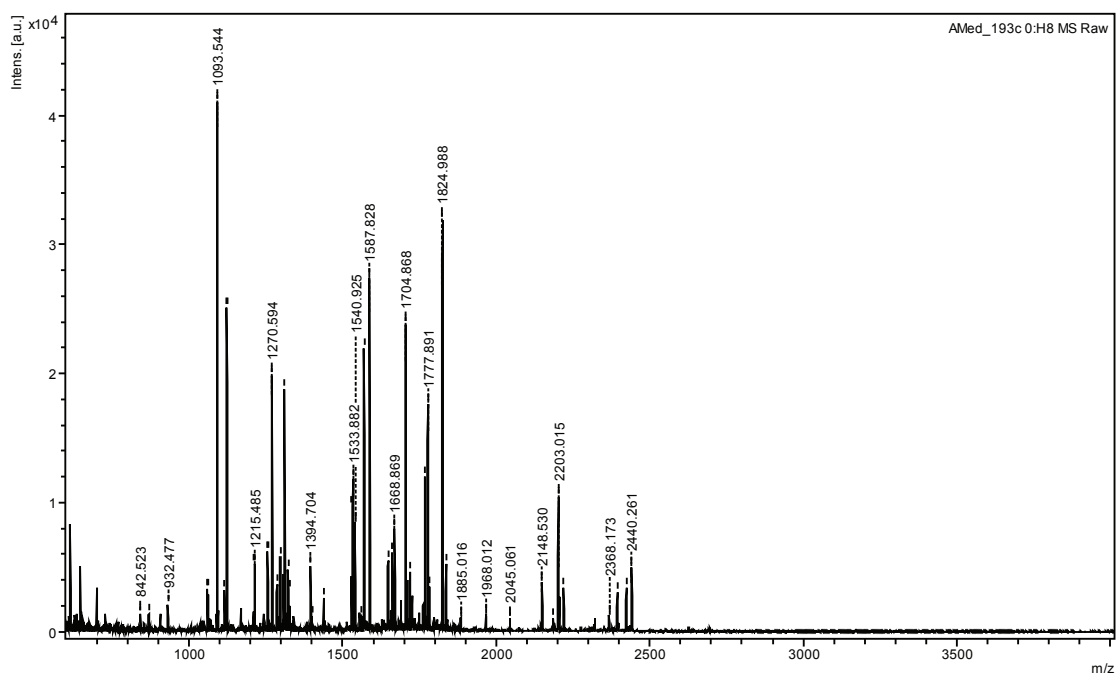

241

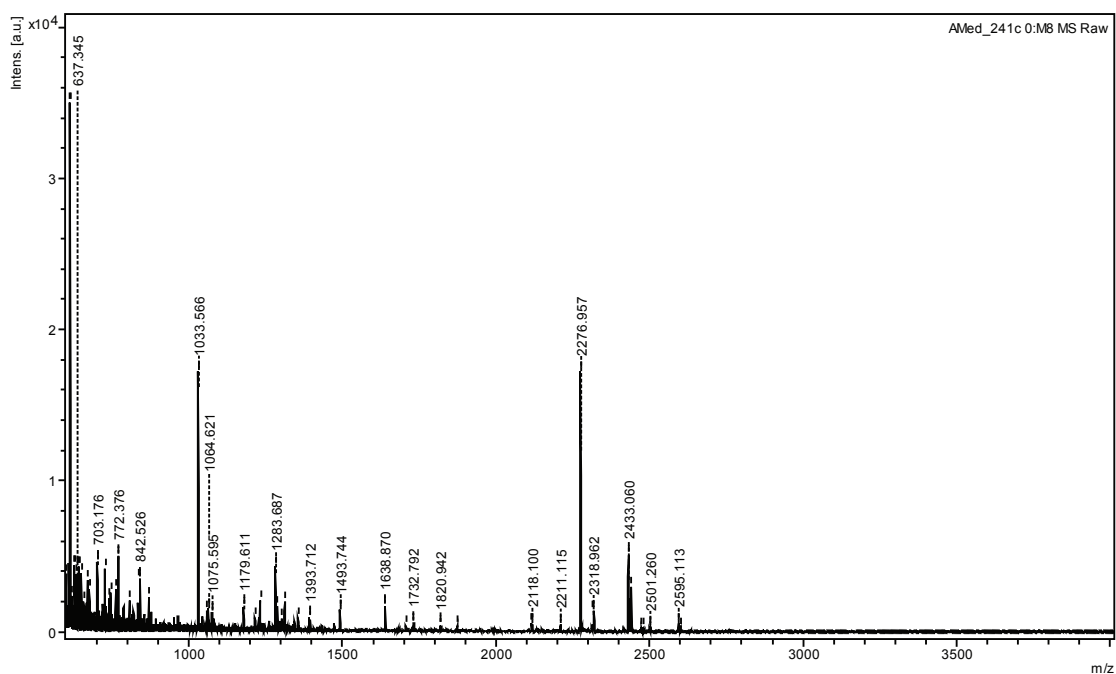

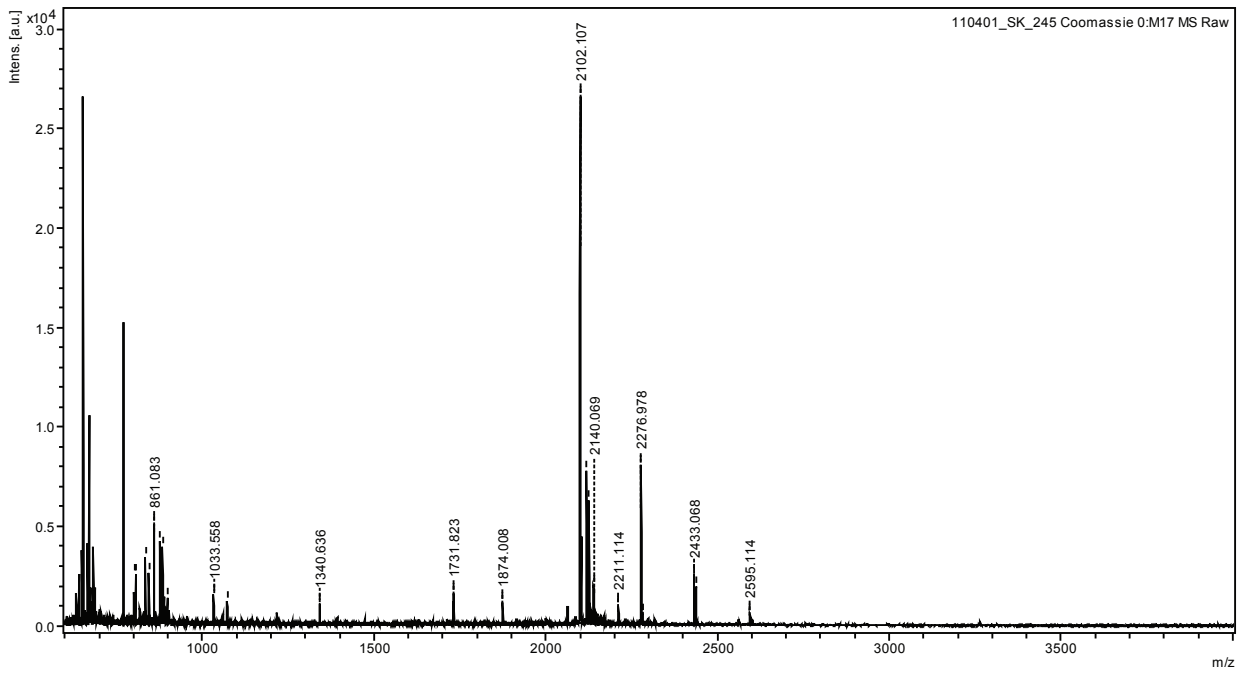

262

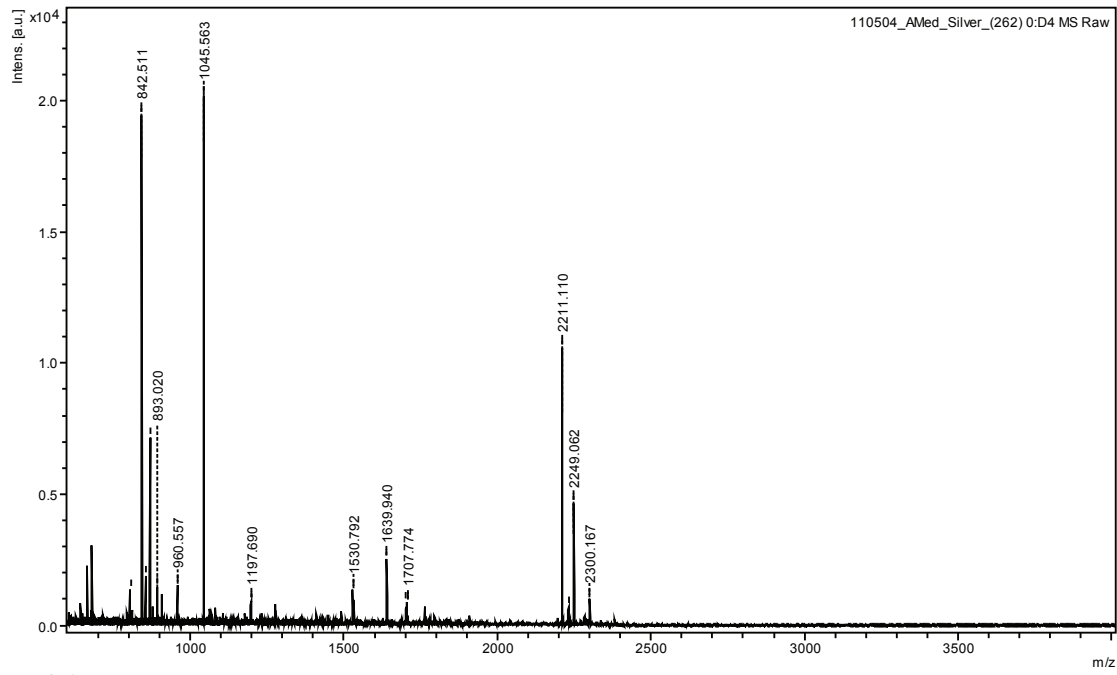

267

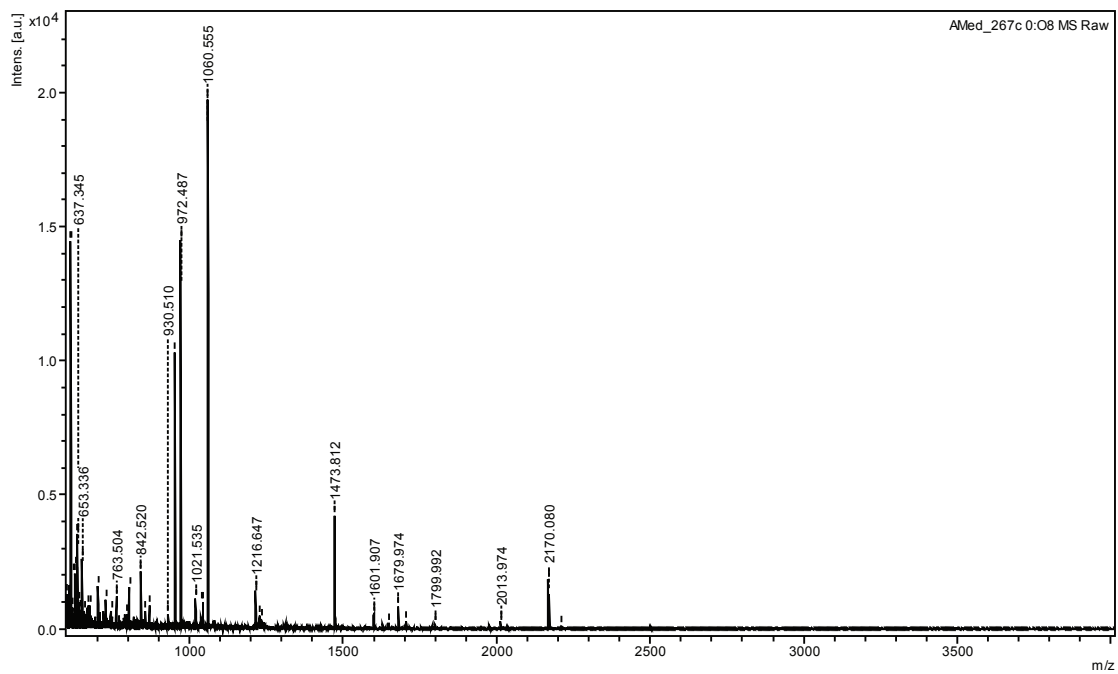



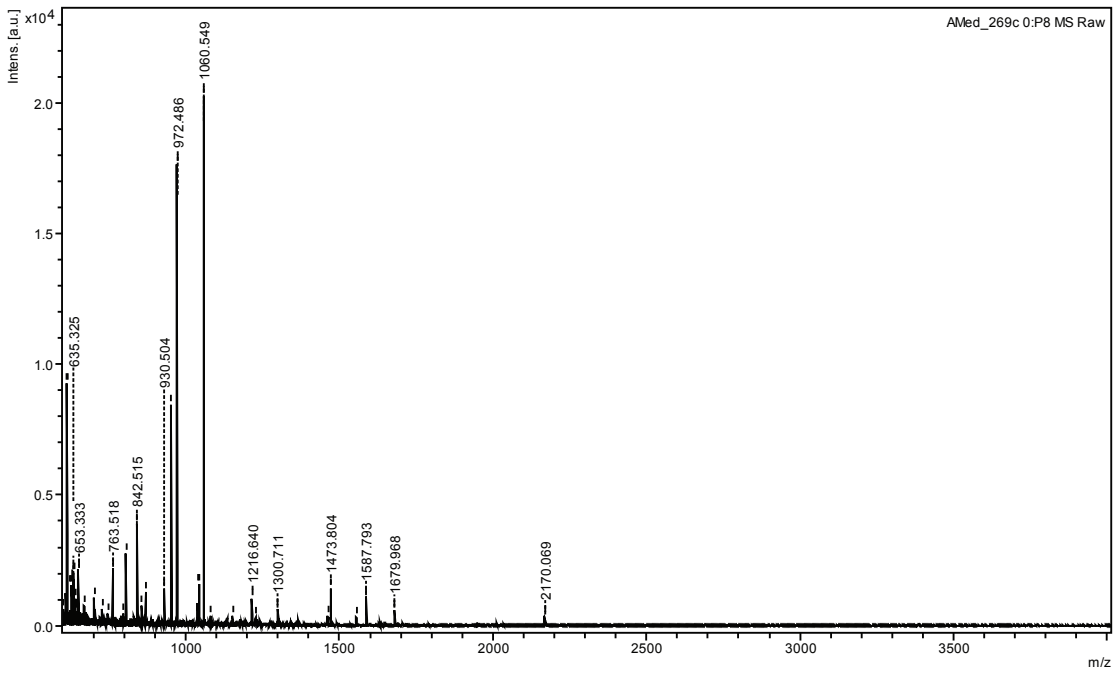

272

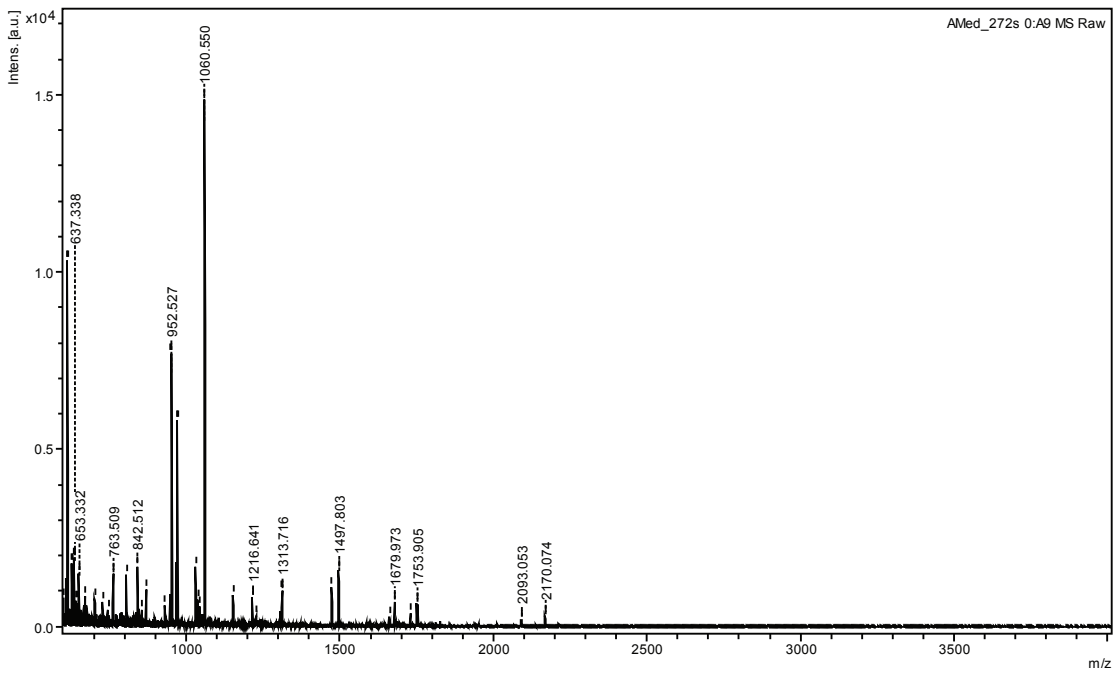

148

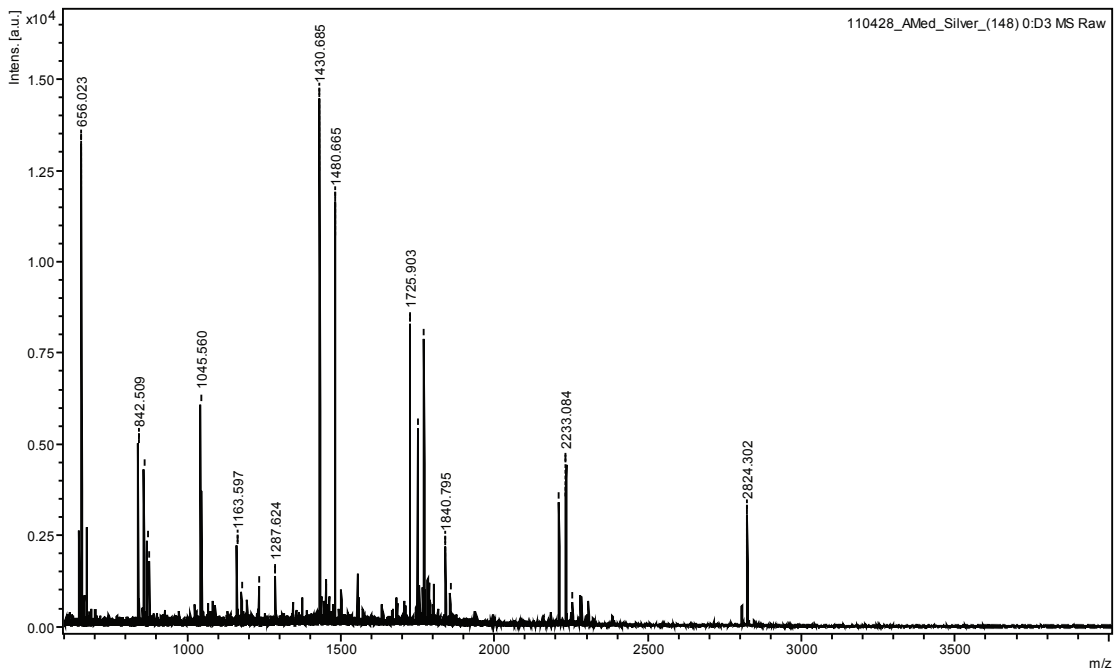

149

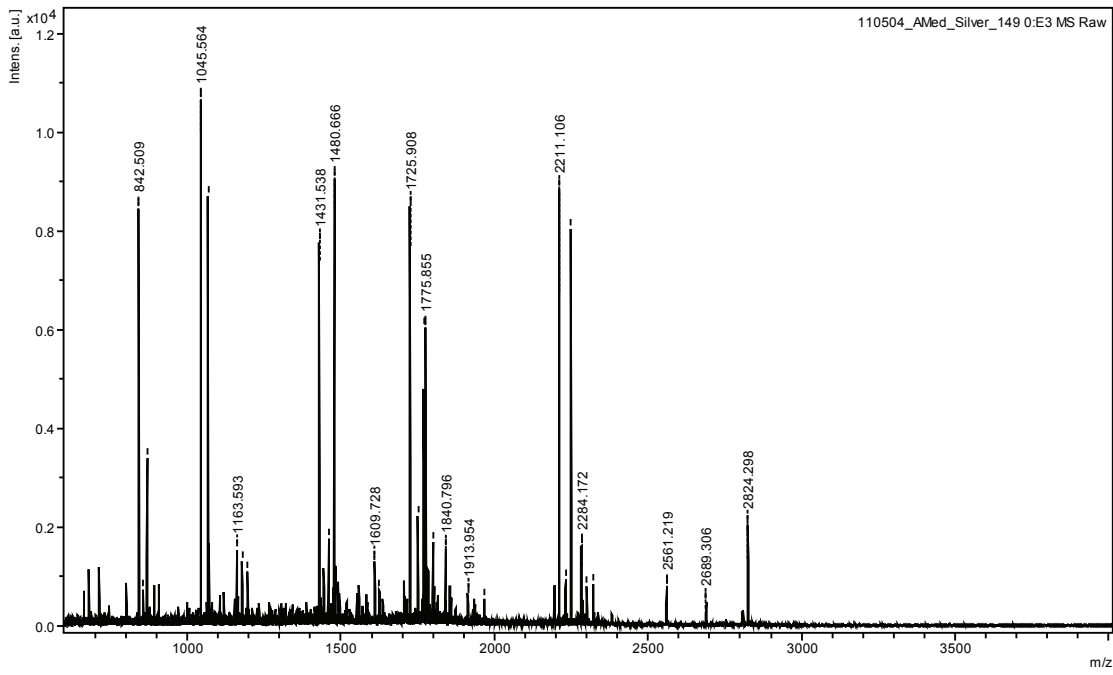

230

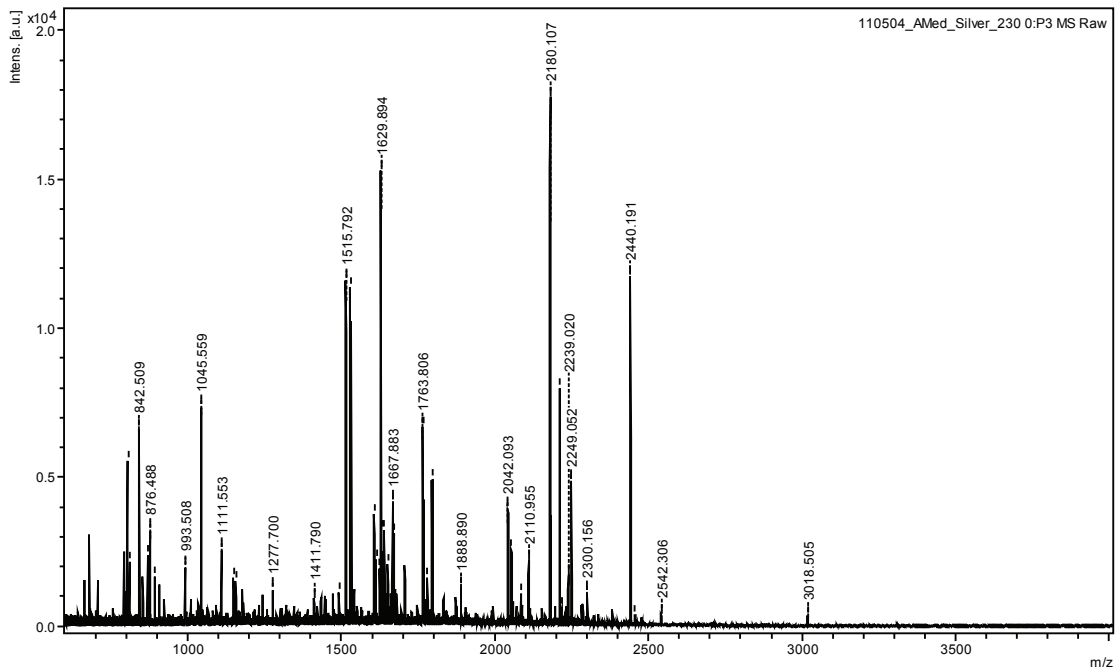

451

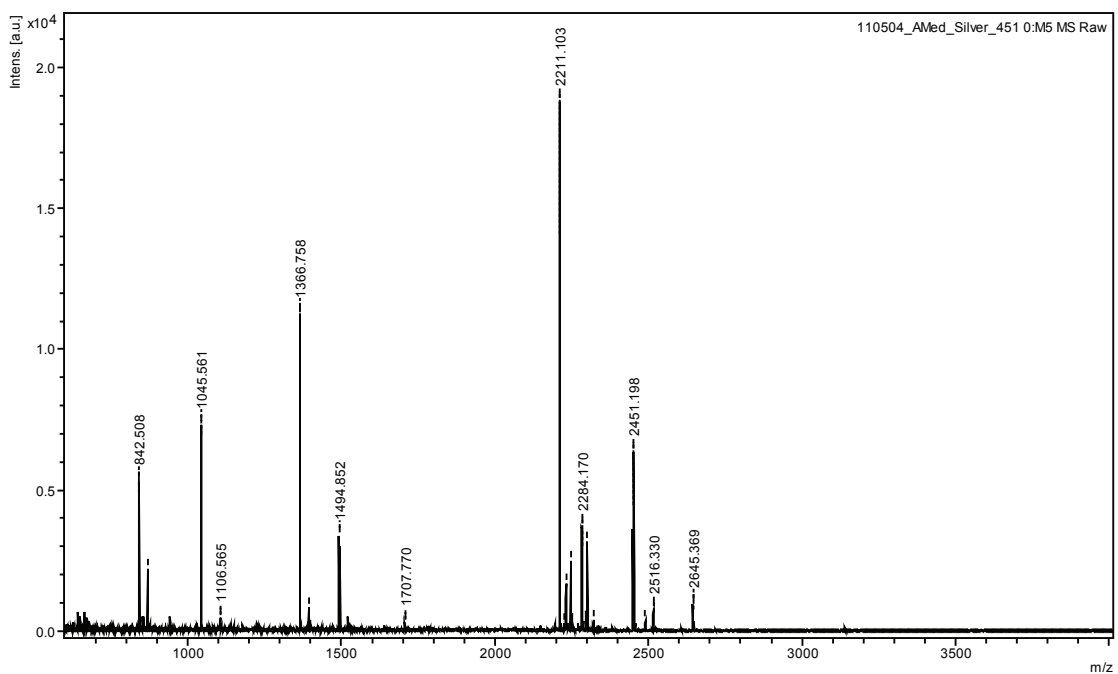

102

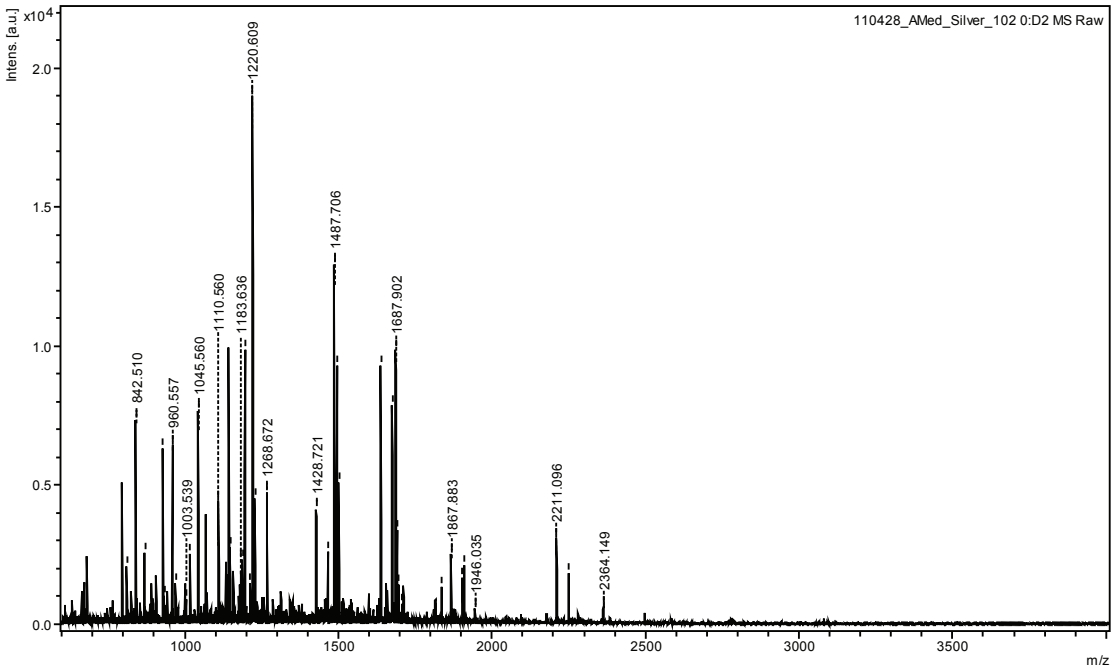

106

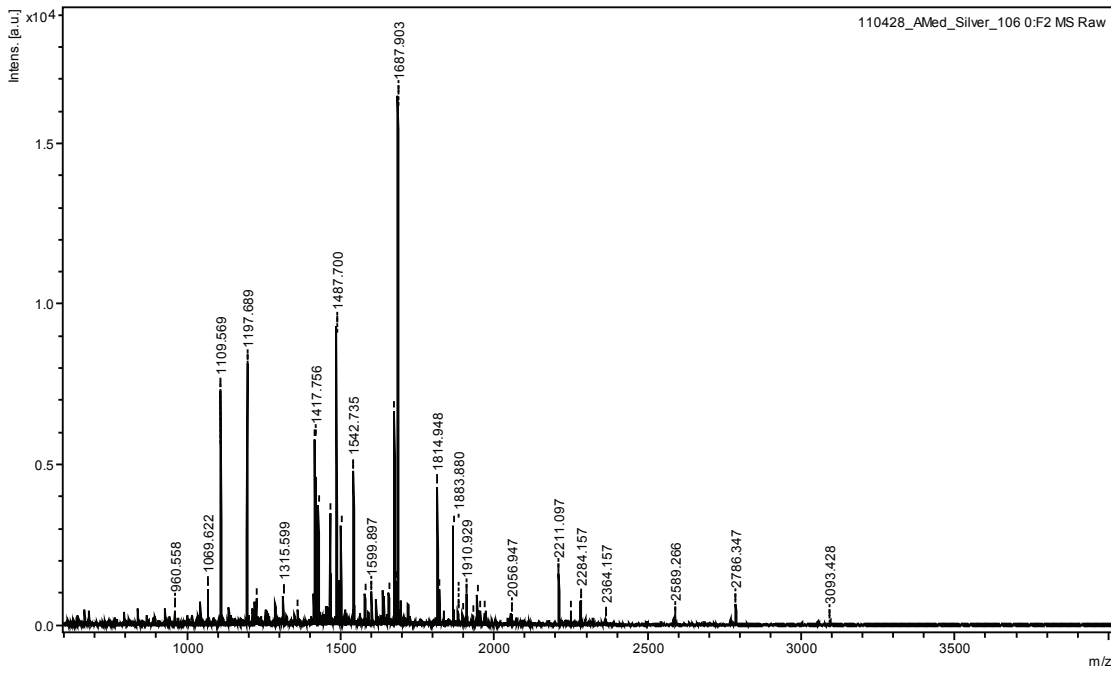

107

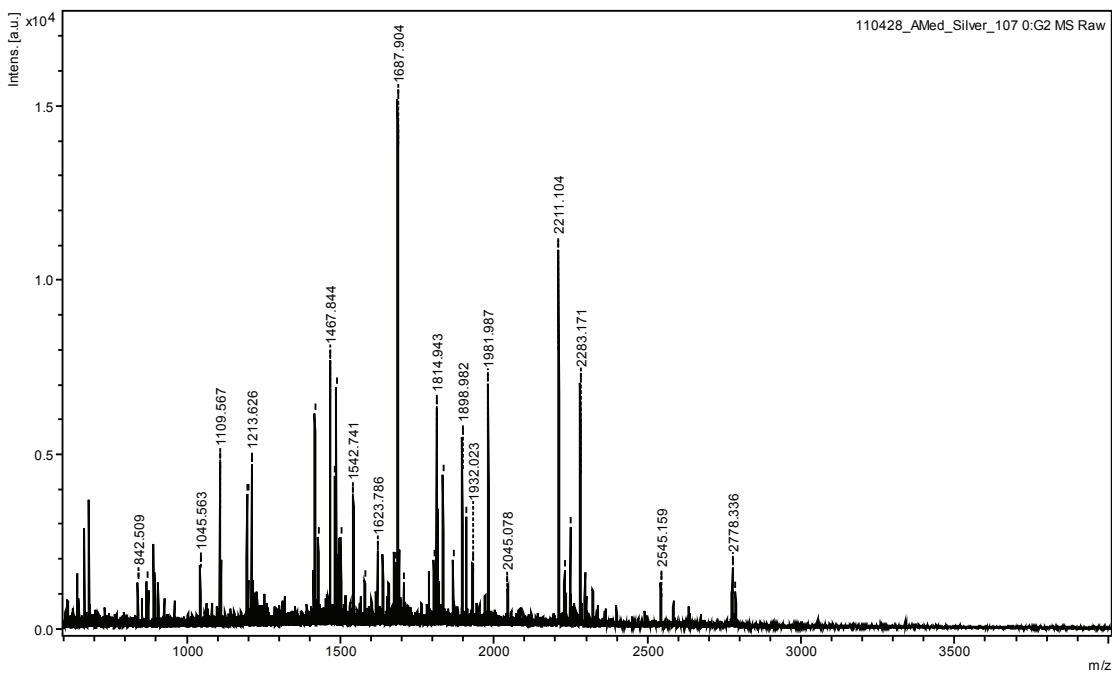

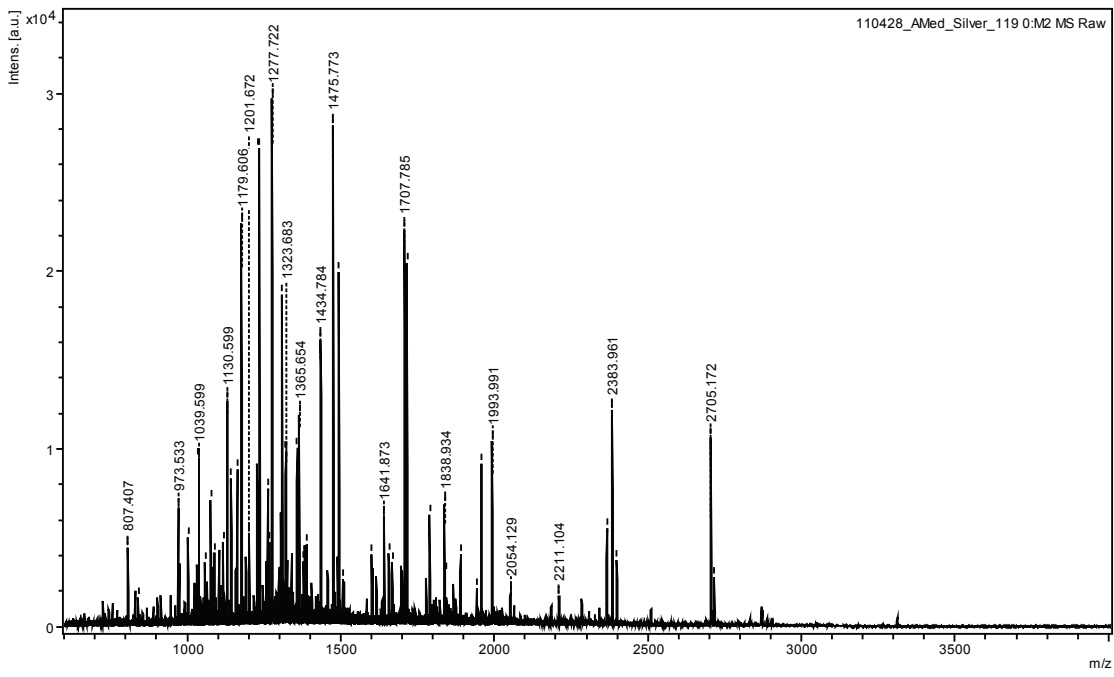

222

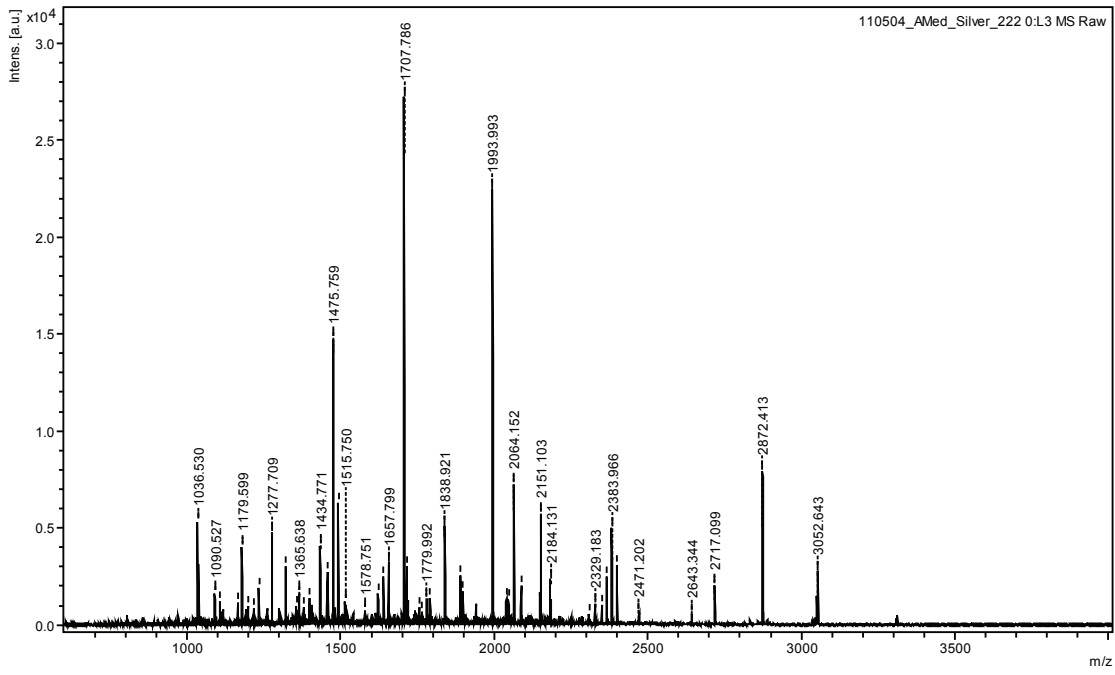

252

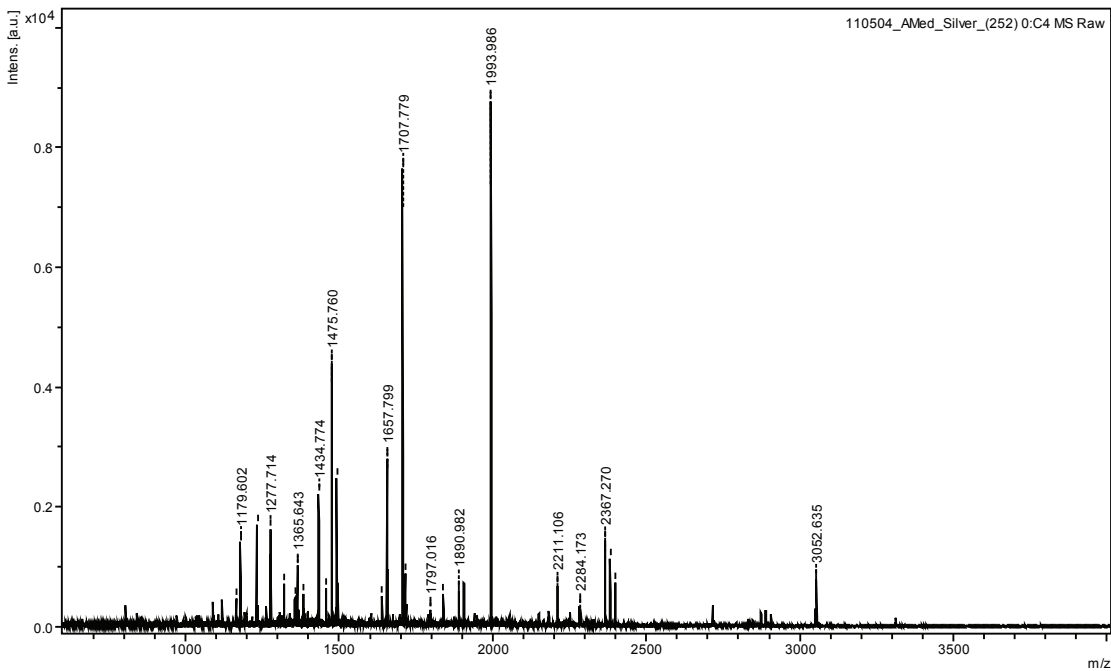

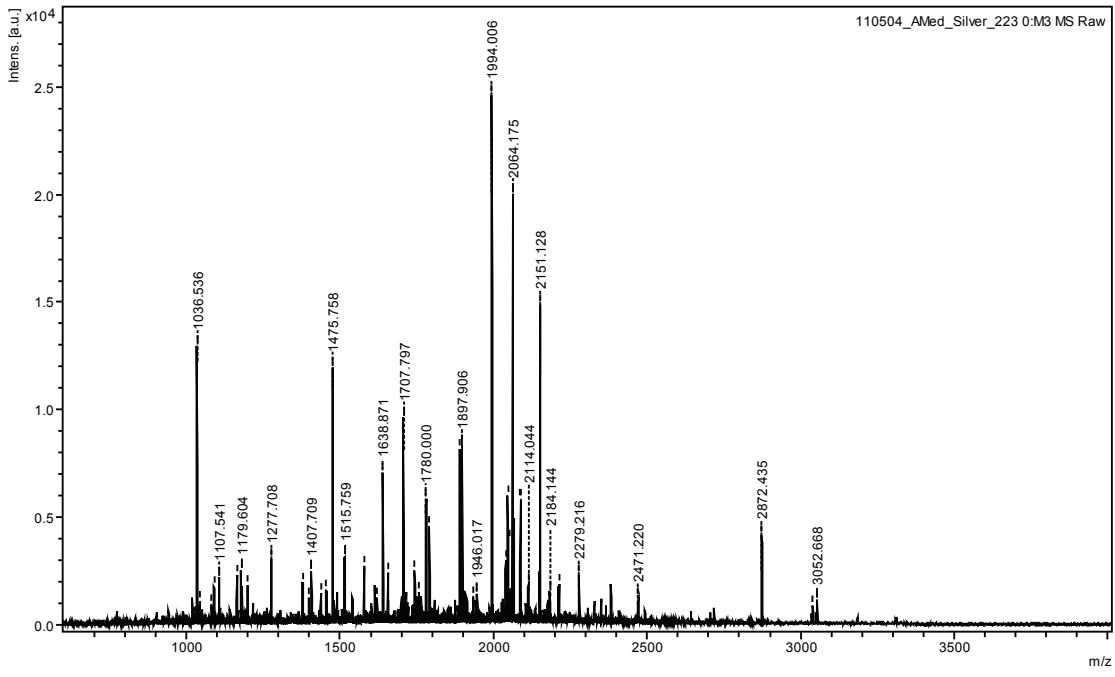

Supplement: supp_M112.021873_mcp.M112.021873-2.pdf [file supp_M112.021873_mcp.M112.021873-2.pdf]
